# Supplementary material for: Translation of Monoclonal Antibodies Pharmacokinetics from Animal to Human Using Physiologically Based Modeling in Open Systems Pharmacology (OSP) Suite: A Retrospective Analysis of Bevacizumab
Source: MDPI journal article supplement (doi:10.3390/pharmaceutics15082129), 2023-08-14
Supplement: s1 [file s1]

# Project Fit-singe

bpasquiers

August 3, 2023

# Contents

|          |                                                      |           |
|----------|------------------------------------------------------|-----------|
| <b>I</b> | <b>Building Blocks</b>                               | <b>6</b>  |
| <b>1</b> | <b>Individuals</b>                                   | <b>7</b>  |
| 1.1      | monkey . . . . .                                     | 7         |
| 1.1.1    | Biometrics . . . . .                                 | 7         |
| 1.1.2    | Anatomy & Physiology . . . . .                       | 7         |
| 1.1.3    | Expression . . . . .                                 | 8         |
| 1.1.3.1  | Metabolizing Enzymes . . . . .                       | 8         |
| 1.1.3.2  | Transport Proteins . . . . .                         | 8         |
| 1.1.3.3  | Protein Binding Partners . . . . .                   | 8         |
| 1.2      | HV_sim . . . . .                                     | 8         |
| 1.2.1    | Biometrics . . . . .                                 | 8         |
| 1.2.2    | Anatomy & Physiology . . . . .                       | 9         |
| 1.2.3    | Expression . . . . .                                 | 9         |
| 1.2.3.1  | Metabolizing Enzymes . . . . .                       | 9         |
| 1.2.3.2  | Transport Proteins . . . . .                         | 9         |
| 1.2.3.3  | Protein Binding Partners . . . . .                   | 9         |
| 1.3      | HV_sim_VEGF . . . . .                                | 9         |
| 1.3.1    | Biometrics . . . . .                                 | 9         |
| 1.3.2    | Anatomy & Physiology . . . . .                       | 10        |
| 1.3.3    | Expression . . . . .                                 | 10        |
| 1.3.3.1  | Metabolizing Enzymes . . . . .                       | 10        |
| 1.3.3.2  | Transport Proteins . . . . .                         | 10        |
| 1.3.3.3  | Protein Binding Partners . . . . .                   | 10        |
| 1.4      | monkey_VEGF . . . . .                                | 10        |
| 1.4.1    | Biometrics . . . . .                                 | 10        |
| 1.4.2    | Anatomy & Physiology . . . . .                       | 11        |
| 1.4.3    | Expression . . . . .                                 | 11        |
| 1.4.3.1  | Metabolizing Enzymes . . . . .                       | 11        |
| 1.4.3.2  | Transport Proteins . . . . .                         | 11        |
| 1.4.3.3  | Protein Binding Partners . . . . .                   | 11        |
| <b>2</b> | <b>Compounds</b>                                     | <b>12</b> |
| 2.1      | bevacizumab_monkey . . . . .                         | 12        |
| 2.1.1    | Basic Physico-chemistry . . . . .                    | 12        |
| 2.1.1.1  | Molecular weight . . . . .                           | 12        |
| 2.1.1.2  | Lipophilicity . . . . .                              | 12        |
| 2.1.1.3  | Fraction unbound (plasma, reference value) . . . . . | 12        |
| 2.1.1.4  | Solubility . . . . .                                 | 13        |
| 2.1.2    | ADME . . . . .                                       | 13        |
| 2.1.2.1  | Absorption . . . . .                                 | 13        |
| 2.1.2.2  | Distribution . . . . .                               | 13        |
| 2.2      | bevacizumab_xtend_monkey . . . . .                   | 13        |
| 2.2.1    | Basic Physico-chemistry . . . . .                    | 13        |
| 2.2.1.1  | Molecular weight . . . . .                           | 14        |
| 2.2.1.2  | Lipophilicity . . . . .                              | 14        |
| 2.2.1.3  | Fraction unbound (plasma, reference value) . . . . . | 14        |
| 2.2.1.4  | Solubility . . . . .                                 | 14        |

|           |                                            |           |
|-----------|--------------------------------------------|-----------|
| 2.2.2     | ADME                                       | 14        |
| 2.2.2.1   | Absorption                                 | 14        |
| 2.2.2.2   | Distribution                               | 15        |
| 2.3       | Bevacizumab_human_sim                      | 15        |
| 2.3.1     | Basic Physico-chemistry                    | 15        |
| 2.3.1.1   | Molecular weight                           | 15        |
| 2.3.1.2   | Lipophilicity                              | 15        |
| 2.3.1.3   | Fraction unbound (plasma, reference value) | 16        |
| 2.3.1.4   | Solubility                                 | 16        |
| 2.3.2     | ADME                                       | 16        |
| 2.3.2.1   | Absorption                                 | 16        |
| 2.3.2.2   | Distribution                               | 16        |
| 2.4       | bevacizumab_monkey_VEGF                    | 17        |
| 2.4.1     | Basic Physico-chemistry                    | 17        |
| 2.4.1.1   | Molecular weight                           | 17        |
| 2.4.1.2   | Lipophilicity                              | 17        |
| 2.4.1.3   | Fraction unbound (plasma, reference value) | 17        |
| 2.4.1.4   | Solubility                                 | 18        |
| 2.4.2     | ADME                                       | 18        |
| 2.4.2.1   | Absorption                                 | 18        |
| 2.4.2.2   | Distribution                               | 18        |
| <b>3</b>  | <b>Protocols</b>                           | <b>20</b> |
| 3.1       | Perfusion 60 min_4 mg/kg                   | 20        |
| 3.2       | Perfusion 90 min_1mg/kg                    | 20        |
| 3.3       | Perfusion 90 min_3mg/kg                    | 21        |
| 3.4       | Perfusion 90 min_0.5mg/kg                  | 21        |
| <b>II</b> | <b>Simulations</b>                         | <b>22</b> |
| <b>1</b>  | <b>Monkey_beava_4mpk</b>                   | <b>23</b> |
| 1.1       | Used building blocks                       | 23        |
| 1.2       | Simulation Properties                      | 23        |
| 1.2.1     | Model Structure                            | 23        |
| 1.2.2     | Compounds                                  | 23        |
| 1.2.2.1   | bevacizumab_monkey                         | 23        |
| 1.2.3     | Administration                             | 24        |
| 1.2.3.1   | bevacizumab_monkey                         | 24        |
| 1.3       | Charts                                     | 24        |
| 1.3.1     | Time Profile Analysis                      | 25        |
| 1.3.1.1   | Global PK-Analyses                         | 25        |
| 1.3.1.2   | PK-Analyses                                | 25        |
| <b>2</b>  | <b>Monkey_beava-xtend_4mpk</b>             | <b>27</b> |
| 2.1       | Used building blocks                       | 27        |
| 2.2       | Simulation Properties                      | 27        |
| 2.2.1     | Model Structure                            | 27        |
| 2.2.2     | Compounds                                  | 27        |
| 2.2.2.1   | bevacizumab_xtend_monkey                   | 27        |
| 2.2.3     | Administration                             | 28        |
| 2.2.3.1   | bevacizumab_xtend_monkey                   | 28        |
| 2.3       | Charts                                     | 28        |
| 2.3.1     | Time Profile Analysis                      | 29        |
| 2.3.1.1   | Global PK-Analyses                         | 29        |
| 2.3.1.2   | PK-Analyses                                | 29        |

|          |                             |           |
|----------|-----------------------------|-----------|
| <b>3</b> | <b>Sim_HV_1mg/kg</b>        | <b>31</b> |
| 3.1      | Used building blocks        | 31        |
| 3.2      | Simulation Properties       | 31        |
| 3.2.1    | Model Structure             | 31        |
| 3.2.2    | Compounds                   | 31        |
| 3.2.2.1  | Bevacizumab_human_sim       | 31        |
| 3.2.3    | Administration              | 32        |
| 3.2.3.1  | Bevacizumab_human_sim       | 32        |
| 3.3      | Charts                      | 32        |
| 3.3.1    | Time Profile Analysis       | 33        |
| 3.3.1.1  | Global PK-Analyses          | 33        |
| 3.3.1.2  | PK-Analyses                 | 33        |
| <b>4</b> | <b>Sim_HV_3mg/kg</b>        | <b>38</b> |
| 4.1      | Used building blocks        | 38        |
| 4.2      | Simulation Properties       | 38        |
| 4.2.1    | Model Structure             | 38        |
| 4.2.2    | Compounds                   | 38        |
| 4.2.2.1  | Bevacizumab_human_sim       | 38        |
| 4.2.3    | Administration              | 39        |
| 4.2.3.1  | Bevacizumab_human_sim       | 39        |
| 4.3      | Charts                      | 39        |
| 4.3.1    | Time Profile Analysis       | 40        |
| 4.3.1.1  | Global PK-Analyses          | 40        |
| 4.3.1.2  | PK-Analyses                 | 40        |
| <b>5</b> | <b>Sim_HV_0.5mg/kg</b>      | <b>44</b> |
| 5.1      | Used building blocks        | 44        |
| 5.2      | Simulation Properties       | 44        |
| 5.2.1    | Model Structure             | 44        |
| 5.2.2    | Compounds                   | 44        |
| 5.2.2.1  | Bevacizumab_human_sim       | 44        |
| 5.2.3    | Administration              | 45        |
| 5.2.3.1  | Bevacizumab_human_sim       | 45        |
| 5.3      | Charts                      | 45        |
| 5.3.1    | Time Profile Analysis       | 46        |
| 5.3.1.1  | Global PK-Analyses          | 46        |
| 5.3.1.2  | PK-Analyses                 | 46        |
| <b>6</b> | <b>Sim_HV_0.5mg/kg_VEGF</b> | <b>50</b> |
| 6.1      | Used building blocks        | 50        |
| 6.2      | Simulation Properties       | 50        |
| 6.2.1    | Model Structure             | 50        |
| 6.2.2    | Compounds                   | 50        |
| 6.2.2.1  | Bevacizumab_human_sim       | 50        |
| 6.2.3    | Processes                   | 51        |
| 6.2.3.1  | Bevacizumab_human_sim       | 51        |
| 6.2.4    | Administration              | 51        |
| 6.2.4.1  | Bevacizumab_human_sim       | 51        |
| 6.3      | Charts                      | 51        |
| 6.3.1    | Time Profile Analysis       | 52        |
| 6.3.1.1  | Global PK-Analyses          | 52        |
| 6.3.1.2  | PK-Analyses                 | 52        |

|            |                                                                                            |           |
|------------|--------------------------------------------------------------------------------------------|-----------|
| <b>7</b>   | <b>Sim_HV_1mg/kg_VEGF</b>                                                                  | <b>56</b> |
| 7.1        | Used building blocks                                                                       | 56        |
| 7.2        | Simulation Properties                                                                      | 56        |
| 7.2.1      | Model Structure                                                                            | 56        |
| 7.2.2      | Compounds                                                                                  | 56        |
| 7.2.2.1    | Bevacizumab_human_sim                                                                      | 56        |
| 7.2.3      | Processes                                                                                  | 57        |
| 7.2.3.1    | Bevacizumab_human_sim                                                                      | 57        |
| 7.2.4      | Administration                                                                             | 57        |
| 7.2.4.1    | Bevacizumab_human_sim                                                                      | 57        |
| 7.3        | Charts                                                                                     | 57        |
| 7.3.1      | Time Profile Analysis                                                                      | 58        |
| 7.3.1.1    | Global PK-Analyses                                                                         | 58        |
| 7.3.1.2    | PK-Analyses                                                                                | 58        |
| <b>8</b>   | <b>Sim_HV_3mg/kg_VEGF</b>                                                                  | <b>63</b> |
| 8.1        | Used building blocks                                                                       | 63        |
| 8.2        | Simulation Properties                                                                      | 63        |
| 8.2.1      | Model Structure                                                                            | 63        |
| 8.2.2      | Compounds                                                                                  | 63        |
| 8.2.2.1    | Bevacizumab_human_sim                                                                      | 63        |
| 8.2.3      | Processes                                                                                  | 64        |
| 8.2.3.1    | Bevacizumab_human_sim                                                                      | 64        |
| 8.2.4      | Administration                                                                             | 64        |
| 8.2.4.1    | Bevacizumab_human_sim                                                                      | 64        |
| 8.3        | Charts                                                                                     | 64        |
| 8.3.1      | Time Profile Analysis                                                                      | 65        |
| 8.3.1.1    | Global PK-Analyses                                                                         | 65        |
| 8.3.1.2    | PK-Analyses                                                                                | 65        |
| <b>9</b>   | <b>Monkey_beva_4mpk_vegf</b>                                                               | <b>69</b> |
| 9.1        | Used building blocks                                                                       | 69        |
| 9.2        | Simulation Properties                                                                      | 69        |
| 9.2.1      | Model Structure                                                                            | 69        |
| 9.2.2      | Compounds                                                                                  | 69        |
| 9.2.2.1    | bevacizumab_monkey_VEGF                                                                    | 69        |
| 9.2.3      | Processes                                                                                  | 70        |
| 9.2.3.1    | bevacizumab_monkey_VEGF                                                                    | 70        |
| 9.2.4      | Administration                                                                             | 70        |
| 9.2.4.1    | bevacizumab_monkey_VEGF                                                                    | 70        |
| 9.3        | Charts                                                                                     | 70        |
| 9.3.1      | Time Profile Analysis                                                                      | 71        |
| 9.3.1.1    | Global PK-Analyses                                                                         | 71        |
| 9.3.1.2    | PK-Analyses                                                                                | 71        |
| <b>III</b> | <b>Simulation Comparisons</b>                                                              | <b>73</b> |
| <b>1</b>   | <b>Comparison_Sim_HV_3mg/kg</b>                                                            | <b>74</b> |
| <b>2</b>   | <b>Comparison_Sim_HV_1mg/kg</b>                                                            | <b>75</b> |
| <b>3</b>   | <b>Comparison_Sim_HV_0.5mg/kg</b>                                                          | <b>76</b> |
| <b>IV</b>  | <b>Observed Data</b>                                                                       | <b>77</b> |
| <b>1</b>   | <b>Beva_Zalevksy2010_monkey_4mpk..Monkey.iv perfusion.4.bevacizumab_monkey</b>             | <b>78</b> |
| <b>2</b>   | <b>Beva-xtend_Zalevksy2010_monkey_4mpk..Monkey.iv perfusion.4.bevacizumab_xtend_monkey</b> | <b>80</b> |

|    |                                                                       |    |
|----|-----------------------------------------------------------------------|----|
| 3  | Beva_Demarchi2021_HV_1mpk..Human.iv perfusion.1.Bevacizumab_human_sim | 82 |
| 4  | Beva_Hetema2017_HV_1mpk..Human.iv perfusion.1.Bevacizumab_human_sim   | 83 |
| 5  | Beva_Hummel2022_HV_1mpk..Human.iv perfusion.1.Bevacizumab_human_sim   | 84 |
| 6  | Beva_Wang2019_HV_1mpk..Human.iv perfusion.1.Bevacizumab_human_sim     | 86 |
| 7  | Beva_wu2019_HV_1mpk..Human.iv perfusion.1.Bevacizumab_human_sim.1     | 87 |
| 8  | Beva_wu2019_HV_1mpk..Human.iv perfusion.1.Bevacizumab_human_sim.2     | 88 |
| 9  | Beva_wu2019_HV_1mpk..Human.iv perfusion.1.Bevacizumab_human_sim.3     | 89 |
| 10 | Beva_shin2020_HV_3mpk..Human.iv perfusion.3.Bevacizumab_human_sim.1   | 90 |
| 11 | Beva_shin2020_HV_3mpk..Human.iv perfusion.3.Bevacizumab_human_sim.2   | 91 |
| 12 | Beva_shin2020_HV_3mpk..Human.iv perfusion.3.Bevacizumab_human_sim.3   | 92 |
| 13 | Beva_sinn2021_HV_3mpk..Human.iv perfusion.3.Bevacizumab_human_sim     | 93 |
| 14 | Beva_li2017_HV_0.5mpk..Human.iv perfusion.0.5.Bevacizumab_human_sim.1 | 95 |
| 15 | Beva_li2017_HV_0.5mpk..Human.iv perfusion.0.5.Bevacizumab_human_sim.2 | 96 |
| 16 | Beva_li2017_HV_0.5mpk..Human.iv perfusion.0.5.Bevacizumab_human_sim.3 | 97 |
| 17 | Beva_li2017_HV_0.5mpk..Human.iv perfusion.0.5.Bevacizumab_human_sim.4 | 98 |
| 18 | Beva_li2017_HV_0.5mpk..Human.iv perfusion.0.5.Bevacizumab_human_sim.5 | 99 |

**Part I**

**Building Blocks**

# Chapter 1

## Individuals

### 1.1 monkey

#### 1.1.1 Biometrics

##### Population Properties

| Population Properties | Value   |
|-----------------------|---------|
| Species               | Monkey  |
| Population            | Monkey  |
| Gender                | Unknown |

**Table 1.1:** Population Properties

##### Individual Parameters

| Individual Parameters | Value | Unit |
|-----------------------|-------|------|
| Weight                | 3.00  | kg   |

**Table 1.2:** Individual Parameters

##### Calculation methods

| Category                  | Calculation methods   |
|---------------------------|-----------------------|
| Endothelial surface areas | Organ vascularization |

**Table 1.3:** Calculation methods

#### 1.1.2 Anatomy & Physiology

Default



### 1.1.3 Expression

#### 1.1.3.1 Metabolizing Enzymes

None

#### 1.1.3.2 Transport Proteins

None

#### 1.1.3.3 Protein Binding Partners

VEGFA

Reference concentration: 3.00E-4  $\mu\text{mol/l}$

t1/2 (liver): 36.00 h

t1/2 (intestine): 23.00 h

Ontogeny/Variability like: Undefined

Localization: Interstitial, BloodCellsMembrane, VascMembraneTissueSide

Expression Levels

| Relative expression | Name | Value  |
|---------------------|------|--------|
| VEGFA               | 0.18 | 0.18 % |
| VEGFA               | 0.18 | 0.18 % |

**Table 1.4:** Expression Levels

## 1.2 HV\_sim

### 1.2.1 Biometrics

#### Population Properties

| Population Properties | Value                 |
|-----------------------|-----------------------|
| Species               | Human                 |
| Population            | European (ICRP, 2002) |
| Gender                | Male                  |

**Table 1.5:** Population Properties

#### Individual Parameters

| Individual Parameters | Value  | Unit              |
|-----------------------|--------|-------------------|
| Age                   | 30.00  | year(s)           |
| Weight                | 73.00  | kg                |
| Height                | 176.00 | cm                |
| BMI                   | 23.57  | kg/m <sup>2</sup> |

**Table 1.6:** Individual Parameters

**Calculation methods**

| Category                  | Calculation methods   |
|---------------------------|-----------------------|
| Endothelial surface areas | Organ vascularization |
| Body surface area         | Mosteller             |

**Table 1.7:** Calculation methods**1.2.2 Anatomy & Physiology**

Default

**1.2.3 Expression****1.2.3.1 Metabolizing Enzymes**

None

**1.2.3.2 Transport Proteins**

None

**1.2.3.3 Protein Binding Partners**

None

**1.3 HV\_sim\_VEGF****1.3.1 Biometrics****Population Properties**

| Population Properties | Value                 |
|-----------------------|-----------------------|
| Species               | Human                 |
| Population            | European (ICRP, 2002) |
| Gender                | Male                  |

**Table 1.8:** Population Properties**Individual Parameters**

| Individual Parameters | Value  | Unit              |
|-----------------------|--------|-------------------|
| Age                   | 30.00  | year(s)           |
| Weight                | 73.00  | kg                |
| Height                | 176.00 | cm                |
| BMI                   | 23.57  | kg/m <sup>2</sup> |

**Table 1.9:** Individual Parameters

**Calculation methods**

| Category                  | Calculation methods   |
|---------------------------|-----------------------|
| Endothelial surface areas | Organ vascularization |
| Body surface area         | Mosteller             |

**Table 1.10:** Calculation methods**1.3.2 Anatomy & Physiology**

Default

**1.3.3 Expression****1.3.3.1 Metabolizing Enzymes**

None

**1.3.3.2 Transport Proteins**

None

**1.3.3.3 Protein Binding Partners**

VEGFA

Reference concentration: 3.00E-3  $\mu\text{mol/l}$ 

t1/2 (liver): 36.00 h

t1/2 (intestine): 23.00 h

Ontogeny/Variability like: Undefined

Localization: Interstitial, BloodCellsMembrane, VascMembraneTissueSide

Expression Levels

| Relative expression | Name | Value  |
|---------------------|------|--------|
| VEGFA               | 0.18 | 0.18 % |
| VEGFA               | 0.18 | 0.18 % |

**Table 1.11:** Expression Levels**1.4 monkey\_VEGF****1.4.1 Biometrics****Population Properties**

| Population Properties | Value   |
|-----------------------|---------|
| Species               | Monkey  |
| Population            | Monkey  |
| Gender                | Unknown |

**Table 1.12:** Population Properties

**Individual Parameters**

| Individual Parameters | Value | Unit |
|-----------------------|-------|------|
| Weight                | 3.00  | kg   |

**Table 1.13:** Individual Parameters**Calculation methods**

| Category                  | Calculation methods   |
|---------------------------|-----------------------|
| Endothelial surface areas | Organ vascularization |

**Table 1.14:** Calculation methods**1.4.2 Anatomy & Physiology**

Default

**1.4.3 Expression****1.4.3.1 Metabolizing Enzymes**

None

**1.4.3.2 Transport Proteins**

None

**1.4.3.3 Protein Binding Partners**

VEGFA

Reference concentration: 3.00E-3  $\mu\text{mol/l}$ 

t1/2 (liver): 36.00 h

t1/2 (intestine): 23.00 h

Ontogeny/Variability like: Undefined

Localization: Interstitial, BloodCellsMembrane, VascMembraneTissueSide

Expression Levels

| Relative expression | Name | Value  |
|---------------------|------|--------|
| VEGFA               | 0.18 | 0.18 % |
| VEGFA               | 0.18 | 0.18 % |

**Table 1.15:** Expression Levels

# Chapter 2

## Compounds

### 2.1 bevacizumab\_monkey

#### 2.1.1 Basic Physico-chemistry

Is small molecule: No

##### 2.1.1.1 Molecular weight

| Parameter                  | Value     | Unit  |
|----------------------------|-----------|-------|
| Molecular weight           | 150.00    | kDa   |
| Effective molecular weight | 150000.00 | g/mol |
| I                          | 0         |       |
| F                          | 0         |       |
| Cl                         | 0         |       |
| Br                         | 0         |       |

**Table 2.1:** Molecular weight

##### 2.1.1.2 Lipophilicity

| Experiment  | Lipophilicity [Log Units] |
|-------------|---------------------------|
| Measurement | −5.00                     |

**Table 2.2:** Lipophilicity

Table 2.2 lists lipophilicity values for compound bevacizumab\_monkey.

##### 2.1.1.3 Fraction unbound (plasma, reference value)

| Experiment  | Fraction Unbound | Species |
|-------------|------------------|---------|
| Measurement | 1.00             | Monkey  |

**Table 2.3:** Fraction unbound (plasma, reference value)

Table 2.3 lists fraction unbound values for compound bevacizumab\_monkey.

**2.1.1.4 Solubility**

| Experiment  | Ref-pH | Solubility at Ref-pH [mg/l] | Solubility gain per charge |
|-------------|--------|-----------------------------|----------------------------|
| Measurement | 7.00   | 9999.00                     | 1000.00                    |

**Table 2.4:** Solubility

Table 2.4 lists solubility values for compound bevacizumab\_monkey.

**2.1.2 ADME****2.1.2.1 Absorption****Specific intestinal permeability**

| Experiment | Lipophilicity | Permeability [cm/min] |
|------------|---------------|-----------------------|
| Calculated | Measurement   | 0                     |

**Table 2.5:** Specific intestinal permeability

Table 2.5 lists intestinal permeability values for compound bevacizumab\_monkey.

**2.1.2.2 Distribution****Specific organ permeability**

| Experiment | Lipophilicity | Permeability [cm/min] |
|------------|---------------|-----------------------|
| Calculated | Measurement   | 0                     |

**Table 2.6:** Specific organ permeability

Table 2.6 lists organ permeability values for compound bevacizumab\_monkey.

**Calculation methods**

| Category                | Calculation methods |
|-------------------------|---------------------|
| Partition coefficients  | PK-Sim Standard     |
| Cellular permeabilities | PK-Sim Standard     |

**Table 2.7:** Calculation methods**2.2 bevacizumab\_xtend\_monkey****2.2.1 Basic Physico-chemistry**

Is small molecule: No

**2.2.1.1 Molecular weight**

| Parameter                  | Value     | Unit  |
|----------------------------|-----------|-------|
| Molecular weight           | 150.00    | kDa   |
| Effective molecular weight | 150000.00 | g/mol |
| I                          | 0         |       |
| F                          | 0         |       |
| Cl                         | 0         |       |
| Br                         | 0         |       |

**Table 2.8:** Molecular weight**2.2.1.2 Lipophilicity**

| Experiment  | Lipophilicity [Log Units] |
|-------------|---------------------------|
| Measurement | −5.00                     |

**Table 2.9:** Lipophilicity

Table 2.9 lists lipophilicity values for compound bevacizumab\_xtend\_monkey.

**2.2.1.3 Fraction unbound (plasma, reference value)**

| Experiment  | Fraction Unbound | Species |
|-------------|------------------|---------|
| Measurement | 1.00             | Monkey  |

**Table 2.10:** Fraction unbound (plasma, reference value)

Table 2.10 lists fraction unbound values for compound bevacizumab\_xtend\_monkey.

**2.2.1.4 Solubility**

| Experiment  | Ref-pH | Solubility at Ref-pH [mg/l] | Solubility gain per charge |
|-------------|--------|-----------------------------|----------------------------|
| Measurement | 7.00   | 9999.00                     | 1000.00                    |

**Table 2.11:** Solubility

Table 2.11 lists solubility values for compound bevacizumab\_xtend\_monkey.

**2.2.2 ADME****2.2.2.1 Absorption****Specific intestinal permeability**

| Experiment | Lipophilicity | Permeability [cm/min] |
|------------|---------------|-----------------------|
| Calculated | Measurement   | 0                     |

**Table 2.12:** Specific intestinal permeability

Table 2.12 lists intestinal permeability values for compound bevacizumab\_xtend\_monkey.

### 2.2.2.2 Distribution

#### Specific organ permeability

| Experiment | Lipophilicity | Permeability [cm/min] |
|------------|---------------|-----------------------|
| Calculated | Measurement   | 0                     |

**Table 2.13:** Specific organ permeability

Table 2.13 lists organ permeability values for compound bevacizumab\_xtend\_monkey.

#### Calculation methods

| Category                | Calculation methods |
|-------------------------|---------------------|
| Partition coefficients  | PK-Sim Standard     |
| Cellular permeabilities | PK-Sim Standard     |

**Table 2.14:** Calculation methods

## 2.3 Bevacizumab\_human\_sim

### 2.3.1 Basic Physico-chemistry

Is small molecule: No

#### 2.3.1.1 Molecular weight

| Parameter                  | Value     | Unit  |
|----------------------------|-----------|-------|
| Molecular weight           | 150.00    | kDa   |
| Effective molecular weight | 150000.00 | g/mol |
| I                          | 0         |       |
| F                          | 0         |       |
| Cl                         | 0         |       |
| Br                         | 0         |       |

**Table 2.15:** Molecular weight

#### 2.3.1.2 Lipophilicity

| Experiment  | Lipophilicity [Log Units] |
|-------------|---------------------------|
| Measurement | -5.00                     |

**Table 2.16:** Lipophilicity

Table 2.16 lists lipophilicity values for compound Bevacizumab\_human\_sim.



**2.3.1.3 Fraction unbound (plasma, reference value)**

| Experiment  | Fraction Unbound | Species |
|-------------|------------------|---------|
| Measurement | 1.00             | Human   |

**Table 2.17:** Fraction unbound (plasma, reference value)

Table 2.17 lists fraction unbound values for compound Bevacizumab\_human\_sim.

**2.3.1.4 Solubility**

| Experiment  | Ref-pH | Solubility at Ref-pH [mg/l] | Solubility gain per charge |
|-------------|--------|-----------------------------|----------------------------|
| Measurement | 7.00   | 9999.00                     | 1000.00                    |

**Table 2.18:** Solubility

Table 2.18 lists solubility values for compound Bevacizumab\_human\_sim.

**2.3.2 ADME****2.3.2.1 Absorption****Specific intestinal permeability**

| Experiment | Lipophilicity | Permeability [cm/min] |
|------------|---------------|-----------------------|
| Calculated | Measurement   | 0                     |

**Table 2.19:** Specific intestinal permeability

Table 2.19 lists intestinal permeability values for compound Bevacizumab\_human\_sim.

**2.3.2.2 Distribution****Specific organ permeability**

| Experiment | Lipophilicity | Permeability [cm/min] |
|------------|---------------|-----------------------|
| Calculated | Measurement   | 0                     |

**Table 2.20:** Specific organ permeability

Table 2.20 lists organ permeability values for compound Bevacizumab\_human\_sim.

**Calculation methods**

| Category                | Calculation methods |
|-------------------------|---------------------|
| Partition coefficients  | PK-Sim Standard     |
| Cellular permeabilities | PK-Sim Standard     |

**Table 2.21:** Calculation methods

VEGF 2-Paper 2

Process Type: Specific Binding

| Parameter | Value                 | Unit   |
|-----------|-----------------------|--------|
| koff      | $3.10 \times 10^{-5}$ | 1/s    |
| Kd        | 0.06                  | nmol/l |

Table 2.22: Parameters

VEGFA-Paper

Process Type: Specific Binding

| Parameter | Value                 | Unit   |
|-----------|-----------------------|--------|
| koff      | $3.10 \times 10^{-5}$ | 1/s    |
| Kd        | 0.06                  | nmol/l |

Table 2.23: Parameters

## 2.4 bevacizumab\_monkey\_VEGF

### 2.4.1 Basic Physico-chemistry

Is small molecule: No

#### 2.4.1.1 Molecular weight

| Parameter                  | Value     | Unit  |
|----------------------------|-----------|-------|
| Molecular weight           | 150.00    | kDa   |
| Effective molecular weight | 150000.00 | g/mol |
| I                          | 0         |       |
| F                          | 0         |       |
| Cl                         | 0         |       |
| Br                         | 0         |       |

Table 2.24: Molecular weight

#### 2.4.1.2 Lipophilicity

| Experiment  | Lipophilicity [Log Units] |
|-------------|---------------------------|
| Measurement | -5.00                     |

Table 2.25: Lipophilicity

Table 2.25 lists lipophilicity values for compound bevacizumab\_monkey\_VEGF.

#### 2.4.1.3 Fraction unbound (plasma, reference value)

| Experiment  | Fraction Unbound | Species |
|-------------|------------------|---------|
| Measurement | 1.00             | Monkey  |

**Table 2.26:** Fraction unbound (plasma, reference value)

Table 2.26 lists fraction unbound values for compound bevacizumab\_monkey\_VEGF.

#### 2.4.1.4 Solubility

| Experiment  | Ref-pH | Solubility at Ref-pH [mg/l] | Solubility gain per charge |
|-------------|--------|-----------------------------|----------------------------|
| Measurement | 7.00   | 9999.00                     | 1000.00                    |

**Table 2.27:** Solubility

Table 2.27 lists solubility values for compound bevacizumab\_monkey\_VEGF.

### 2.4.2 ADME

#### 2.4.2.1 Absorption

##### Specific intestinal permeability

| Experiment | Lipophilicity | Permeability [cm/min] |
|------------|---------------|-----------------------|
| Calculated | Measurement   | 0                     |

**Table 2.28:** Specific intestinal permeability

Table 2.28 lists intestinal permeability values for compound bevacizumab\_monkey\_VEGF.

#### 2.4.2.2 Distribution

##### Specific organ permeability

| Experiment | Lipophilicity | Permeability [cm/min] |
|------------|---------------|-----------------------|
| Calculated | Measurement   | 0                     |

**Table 2.29:** Specific organ permeability

Table 2.29 lists organ permeability values for compound bevacizumab\_monkey\_VEGF.

#### Calculation methods

| Category                | Calculation methods |
|-------------------------|---------------------|
| Partition coefficients  | PK-Sim Standard     |
| Cellular permeabilities | PK-Sim Standard     |

**Table 2.30:** Calculation methods

VEGFA-paper

Process Type: Specific Binding

| Parameter | Value | Unit   |
|-----------|-------|--------|
| koff      | 4.06  | 1/s    |
| Kd        | 0.03  | nmol/l |

**Table 2.31:** Parameters

# Chapter 3

## Protocols

### 3.1 Perfusion 60 min\_4 mg/kg

| Property            | Value                |
|---------------------|----------------------|
| Process Type        | Simple protocol      |
| Administration type | Intravenous Infusion |
| Dosing interval     | Single               |

**Table 3.1**

| Parameter     | Value | Unit  |
|---------------|-------|-------|
| Dose          | 4.00  | mg/kg |
| Infusion time | 60.00 | min   |

**Table 3.2:** Parameters

### 3.2 Perfusion 90 min\_1mg/kg

| Property            | Value                |
|---------------------|----------------------|
| Process Type        | Simple protocol      |
| Administration type | Intravenous Infusion |
| Dosing interval     | Single               |

**Table 3.3**

| Parameter     | Value | Unit  |
|---------------|-------|-------|
| Dose          | 1.00  | mg/kg |
| Infusion time | 90.00 | min   |

**Table 3.4:** Parameters

### 3.3 Perfusion 90 min\_3mg/kg

| Property            | Value                |
|---------------------|----------------------|
| Process Type        | Simple protocol      |
| Administration type | Intravenous Infusion |
| Dosing interval     | Single               |

Table 3.5

| Parameter     | Value | Unit  |
|---------------|-------|-------|
| Dose          | 3.00  | mg/kg |
| Infusion time | 90.00 | min   |

Table 3.6: Parameters

### 3.4 Perfusion 90 min\_0.5mg/kg

| Property            | Value                |
|---------------------|----------------------|
| Process Type        | Simple protocol      |
| Administration type | Intravenous Infusion |
| Dosing interval     | Single               |

Table 3.7

| Parameter     | Value | Unit  |
|---------------|-------|-------|
| Dose          | 0.50  | mg/kg |
| Infusion time | 90.00 | min   |

Table 3.8: Parameters

## Part II

# Simulations

# Chapter 1

## Monkey\_beva\_4mpk

### 1.1 Used building blocks

| Building Block | Name                                                 |
|----------------|------------------------------------------------------|
| Individual     | monkey (see section 1.1 in Part I)                   |
| Compound       | bevacizumab_monkey (see section 2.1 in Part I)       |
| Protocol       | Perfusion 60 min_4 mg/kg (see section 3.1 in Part I) |

**Table 1.1:** Building Block

### 1.2 Simulation Properties

#### 1.2.1 Model Structure

Allow aging

No

Calculation methods

| Category                  | Calculation methods   |
|---------------------------|-----------------------|
| Endothelial surface areas | Organ vascularization |

**Table 1.2:** Calculation methods

#### 1.2.2 Compounds

##### 1.2.2.1 bevacizumab\_monkey

Compound Configuration

| Parameter                                  | Alternative in compound | Value   | Unit      |
|--------------------------------------------|-------------------------|---------|-----------|
| Solubility                                 | Measurement             | 9999.00 | mg/l      |
| Lipophilicity                              | Measurement             | −5.00   | Log Units |
| Fraction unbound (plasma, reference value) | Measurement             | 1.00    |           |
| Specific organ permeability                | Calculated              | 0       | cm/min    |
| <i>continued on next page</i>              |                         |         |           |



| <i>continued from previous page</i> |                         |       |        |
|-------------------------------------|-------------------------|-------|--------|
| Parameter                           | Alternative in compound | Value | Unit   |
| Specific intestinal permeability    | Calculated              | 0     | cm/min |

**Table 1.3:** Compound Configuration**Calculation methods**

| Category                | Calculation methods |
|-------------------------|---------------------|
| Partition coefficients  | PK-Sim Standard     |
| Cellular permeabilities | PK-Sim Standard     |

**Table 1.4:** Calculation methods**1.2.3 Administration****1.2.3.1 bevacizumab\_monkey****Simple protocol**

Intravenous Infusion

Dosing interval: Single

Dose: 4.00 mg/kg

Infusion time: 60.00 min

**1.3 Charts**

### 1.3.1 Time Profile Analysis

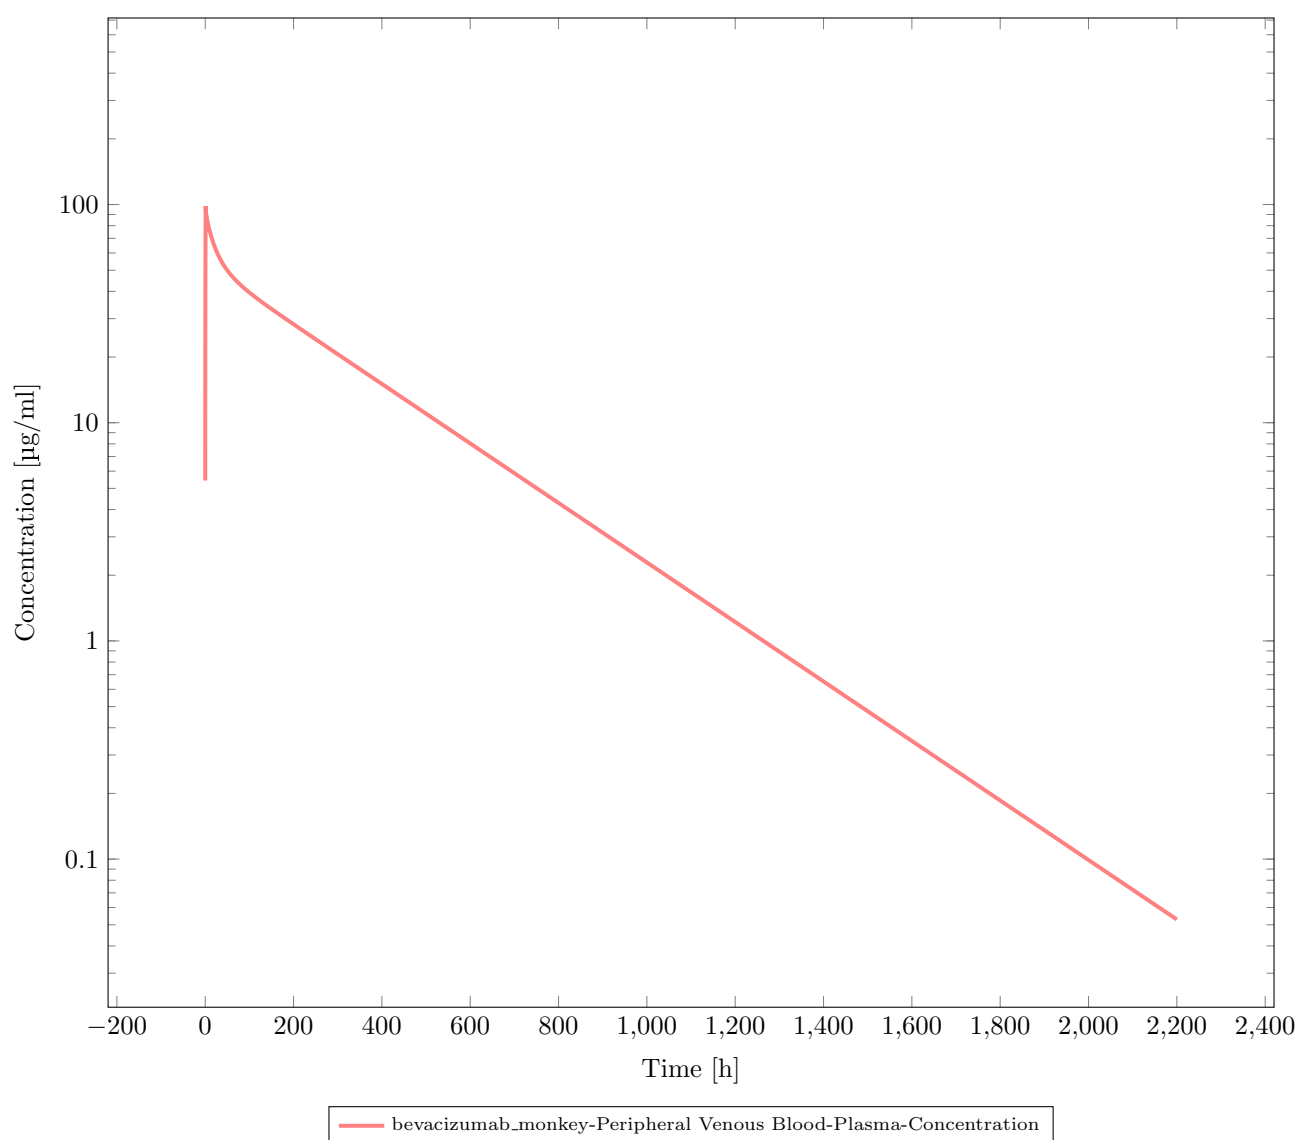

**Figure 1.1**

#### 1.3.1.1 Global PK-Analyses

| Parameter              | Compound           | Value                 | Unit      |
|------------------------|--------------------|-----------------------|-----------|
| Vss (plasma)           | bevacizumab_monkey | 68.43                 | ml/kg     |
| Vd (plasma)            | bevacizumab_monkey | 71.82                 | ml/kg     |
| Vss (phys-chem)        | bevacizumab_monkey | 644.98                | ml/kg     |
| Total plasma clearance | bevacizumab_monkey | $3.76 \times 10^{-3}$ | ml/min/kg |

**Table 1.5:** Global PK-Analyses

#### 1.3.1.2 PK-Analyses

**bevacizumab\_monkey-Peripheral Venous Blood-Plasma-Concentration**

| Parameter                    | Value                 | Unit       |
|------------------------------|-----------------------|------------|
| C <sub>max</sub>             | 0.65                  | μmol/l     |
| C <sub>max_norm</sub>        | $2.45 \times 10^7$    | mg/l       |
| t <sub>max</sub>             | 1.00                  | h          |
| C <sub>tEnd</sub>            | $3.52 \times 10^{-4}$ | μmol/l     |
| AUC <sub>tEnd</sub>          | 7086.18               | μmol*min/l |
| AUC <sub>tEnd_norm</sub>     | $2.66 \times 10^{14}$ | μg*min/l   |
| AUC <sub>inf</sub>           | 7092.91               | μmol*min/l |
| AUC <sub>inf_norm</sub>      | $2.66 \times 10^{14}$ | μg*min/l   |
| MRT                          | 303.35                | h          |
| Half-Life                    | 220.69                | h          |
| % AUC (t <sub>last</sub> -∞) | $9.49 \times 10^{-4}$ |            |
| Total body clearance/F       | $3.76 \times 10^{-3}$ | ml/min/kg  |
| V <sub>ss</sub> (plasma)/F   | 68.43                 | ml/kg      |
| V <sub>d</sub> (plasma)/F    | 71.82                 | ml/kg      |

**Table 1.6:** PK-Analyses for bevacizumab\_monkey-Peripheral Venous Blood-Plasma-Concentration**Beva\_Zalevksy2010\_monkey\_4mpk..Monkey.iv perfusion.4.bevacizumab\_monkey-bevacizumab\_monkey-Measurement**

| Parameter                    | Value                 | Unit       |
|------------------------------|-----------------------|------------|
| C <sub>max</sub>             | 0.77                  | μmol/l     |
| C <sub>max_norm</sub>        | $2.90 \times 10^7$    | mg/l       |
| t <sub>max</sub>             | 1.92                  | h          |
| C <sub>tEnd</sub>            | $6.74 \times 10^{-4}$ | μmol/l     |
| AUC <sub>tEnd</sub>          | 7847.21               | μmol*min/l |
| AUC <sub>tEnd_norm</sub>     | $2.94 \times 10^{14}$ | μg*min/l   |
| AUC <sub>inf</sub>           | 7863.87               | μmol*min/l |
| AUC <sub>inf_norm</sub>      | $2.95 \times 10^{14}$ | μg*min/l   |
| MRT                          | 339.82                | h          |
| Half-Life                    | 285.61                | h          |
| % AUC (t <sub>last</sub> -∞) | $2.12 \times 10^{-3}$ |            |
| Total body clearance/F       | $3.39 \times 10^{-3}$ | ml/min/kg  |
| V <sub>ss</sub> (plasma)/F   | 69.14                 | ml/kg      |
| V <sub>d</sub> (plasma)/F    | 83.84                 | ml/kg      |

**Table 1.7:** PK-Analyses for Beva\_Zalevksy2010\_monkey\_4mpk..Monkey.iv perfusion.4.bevacizumab\_monkey-bevacizumab\_monkey-Measurement

## Chapter 2

# Monkey\_beva-xtend\_4mpk

### 2.1 Used building blocks

| Building Block | Name                                                 |
|----------------|------------------------------------------------------|
| Individual     | monkey (see section 1.1 in Part I)                   |
| Compound       | bevacizumab_xtend_monkey (see section 2.2 in Part I) |
| Protocol       | Perfusion 60 min_4 mg/kg (see section 3.1 in Part I) |

**Table 2.1:** Building Block

### 2.2 Simulation Properties

#### 2.2.1 Model Structure

Allow aging

No

Calculation methods

| Category                  | Calculation methods   |
|---------------------------|-----------------------|
| Endothelial surface areas | Organ vascularization |

**Table 2.2:** Calculation methods

#### 2.2.2 Compounds

##### 2.2.2.1 bevacizumab\_xtend\_monkey

Compound Configuration

| Parameter                                  | Alternative in compound | Value   | Unit      |
|--------------------------------------------|-------------------------|---------|-----------|
| Solubility                                 | Measurement             | 9999.00 | mg/l      |
| Lipophilicity                              | Measurement             | −5.00   | Log Units |
| Fraction unbound (plasma, reference value) | Measurement             | 1.00    |           |
| Specific organ permeability                | Calculated              | 0       | cm/min    |
| <i>continued on next page</i>              |                         |         |           |

| <i>continued from previous page</i> |                         |       |        |
|-------------------------------------|-------------------------|-------|--------|
| Parameter                           | Alternative in compound | Value | Unit   |
| Specific intestinal permeability    | Calculated              | 0     | cm/min |

**Table 2.3:** Compound Configuration**Calculation methods**

| Category                | Calculation methods |
|-------------------------|---------------------|
| Partition coefficients  | PK-Sim Standard     |
| Cellular permeabilities | PK-Sim Standard     |

**Table 2.4:** Calculation methods**2.2.3 Administration****2.2.3.1 bevacizumab\_xtend\_monkey****Simple protocol**

Intravenous Infusion

Dosing interval: Single

Dose: 4.00 mg/kg

Infusion time: 60.00 min

**2.3 Charts**

### 2.3.1 Time Profile Analysis

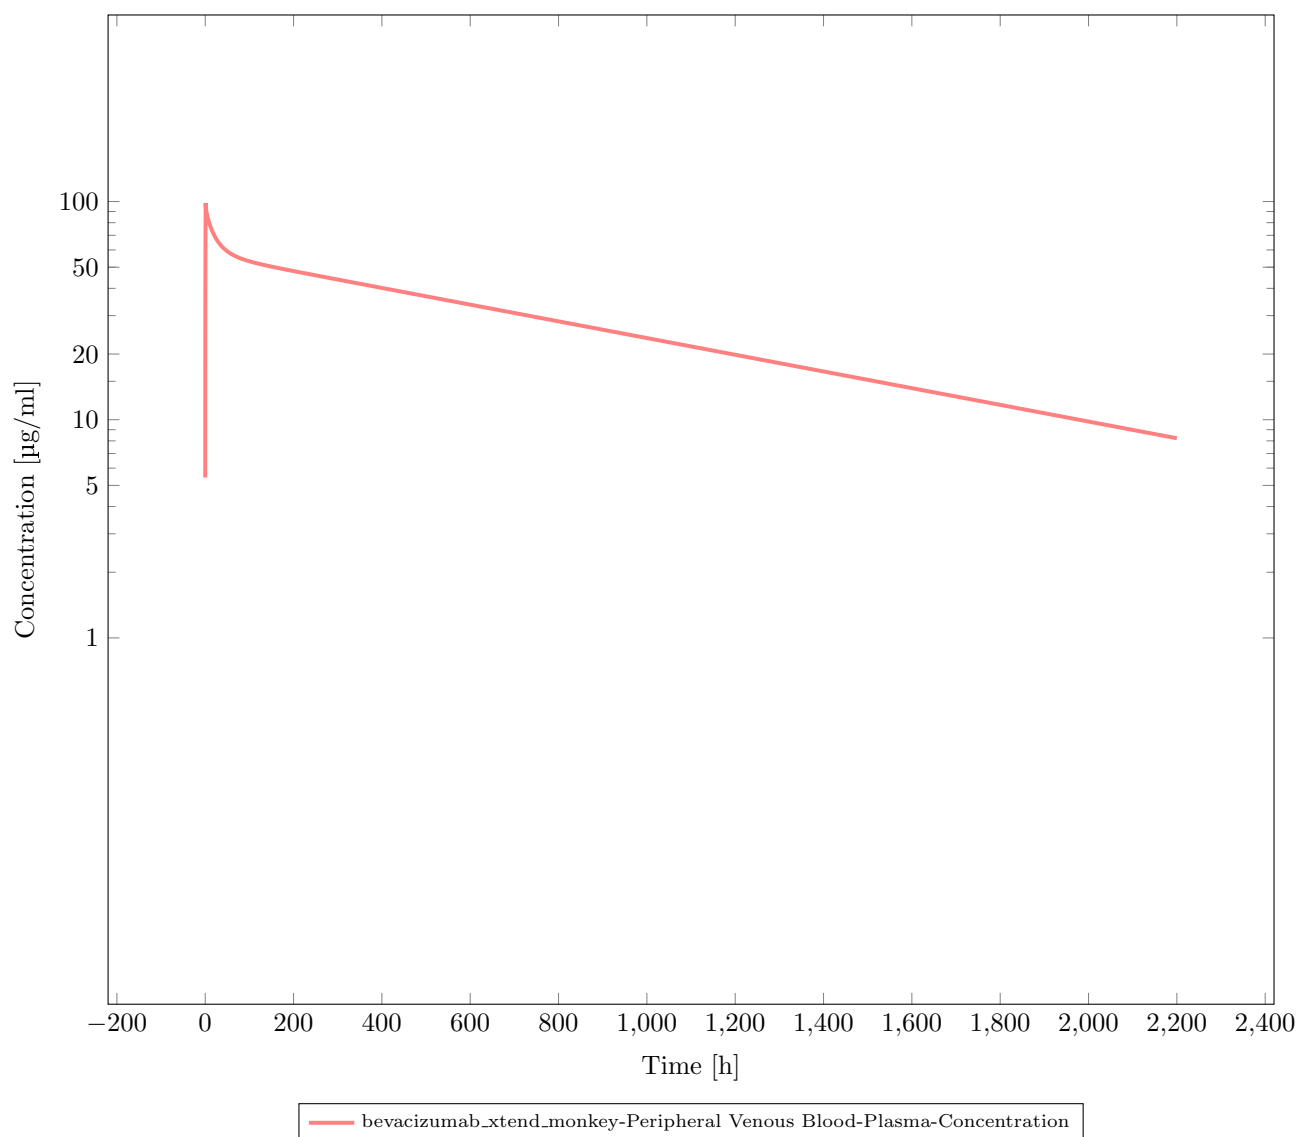

**Figure 2.1**

#### 2.3.1.1 Global PK-Analyses

| Parameter              | Compound                 | Value                 | Unit      |
|------------------------|--------------------------|-----------------------|-----------|
| Vss (plasma)           | bevacizumab_xtend_monkey | 68.25                 | ml/kg     |
| Vd (plasma)            | bevacizumab_xtend_monkey | 69.13                 | ml/kg     |
| Vss (phys-chem)        | bevacizumab_xtend_monkey | 644.98                | ml/kg     |
| Total plasma clearance | bevacizumab_xtend_monkey | $1.02 \times 10^{-3}$ | ml/min/kg |

**Table 2.5:** Global PK-Analyses

#### 2.3.1.2 PK-Analyses

**bevacizumab\_xtend\_monkey-Peripheral Venous Blood-Plasma-Concentration**

| Parameter                    | Value                 | Unit       |
|------------------------------|-----------------------|------------|
| C <sub>max</sub>             | 0.66                  | μmol/l     |
| C <sub>max_norm</sub>        | $2.46 \times 10^7$    | mg/l       |
| t <sub>max</sub>             | 1.00                  | h          |
| C <sub>tEnd</sub>            | 0.05                  | μmol/l     |
| AUC <sub>tEnd</sub>          | 22535.66              | μmol*min/l |
| AUC <sub>tEnd_norm</sub>     | $8.45 \times 10^{14}$ | μg*min/l   |
| AUC <sub>inf</sub>           | 26269.32              | μmol*min/l |
| AUC <sub>inf_norm</sub>      | $9.85 \times 10^{14}$ | μg*min/l   |
| MRT                          | 1120.59               | h          |
| Half-Life                    | 786.73                | h          |
| % AUC (t <sub>last</sub> -∞) | 0.14                  |            |
| Total body clearance/F       | $1.02 \times 10^{-3}$ | ml/min/kg  |
| V <sub>ss</sub> (plasma)/F   | 68.25                 | ml/kg      |
| V <sub>d</sub> (plasma)/F    | 69.13                 | ml/kg      |

**Table 2.6:** PK-Analyses for bevacizumab\_xtend\_monkey-Peripheral Venous Blood-Plasma-Concentration**Beva-xtend\_Zalevksy2010\_monkey\_4mpk..Monkey.iv perfusion.4.bevacizumab\_xtend\_monkey-bevacizumab\_xtend\_monkey-Measurement**

| Parameter                    | Value                 | Unit       |
|------------------------------|-----------------------|------------|
| C <sub>max</sub>             | 0.81                  | μmol/l     |
| C <sub>max_norm</sub>        | $3.05 \times 10^7$    | mg/l       |
| t <sub>max</sub>             | 1.93                  | h          |
| C <sub>tEnd</sub>            | 0.05                  | μmol/l     |
| AUC <sub>tEnd</sub>          | 21298.20              | μmol*min/l |
| AUC <sub>tEnd_norm</sub>     | $7.99 \times 10^{14}$ | μg*min/l   |
| AUC <sub>inf</sub>           | 24317.36              | μmol*min/l |
| AUC <sub>inf_norm</sub>      | $9.12 \times 10^{14}$ | μg*min/l   |
| MRT                          | 1020.02               | h          |
| Half-Life                    | 668.24                | h          |
| % AUC (t <sub>last</sub> -∞) | 0.12                  |            |
| Total body clearance/F       | $1.10 \times 10^{-3}$ | ml/min/kg  |
| V <sub>ss</sub> (plasma)/F   | 67.11                 | ml/kg      |
| V <sub>d</sub> (plasma)/F    | 63.43                 | ml/kg      |

**Table 2.7:** PK-Analyses for Beva-xtend\_Zalevksy2010\_monkey\_4mpk..Monkey.iv perfusion.4.bevacizumab\_xtend\_monkey-bevacizumab\_xtend\_monkey-Measurement

## Chapter 3

# Sim\_HV\_1mg/kg

### 3.1 Used building blocks

| Building Block | Name                                                |
|----------------|-----------------------------------------------------|
| Individual     | HV_sim (see section 1.2 in Part I)                  |
| Compound       | Bevacizumab_human_sim (see section 2.3 in Part I)   |
| Protocol       | Perfusion 90 min_1mg/kg (see section 3.2 in Part I) |

**Table 3.1:** Building Block

### 3.2 Simulation Properties

#### 3.2.1 Model Structure

Allow aging

No

#### Calculation methods

| Category                  | Calculation methods   |
|---------------------------|-----------------------|
| Endothelial surface areas | Organ vascularization |
| Body surface area         | Mosteller             |

**Table 3.2:** Calculation methods

#### 3.2.2 Compounds

##### 3.2.2.1 Bevacizumab\_human\_sim

#### Compound Configuration

| Parameter                                  | Alternative in compound | Value   | Unit      |
|--------------------------------------------|-------------------------|---------|-----------|
| Solubility                                 | Measurement             | 9999.00 | mg/l      |
| Lipophilicity                              | Measurement             | −5.00   | Log Units |
| Fraction unbound (plasma, reference value) | Measurement             | 1.00    |           |
| <i>continued on next page</i>              |                         |         |           |



| <i>continued from previous page</i> |                         |       |        |
|-------------------------------------|-------------------------|-------|--------|
| Parameter                           | Alternative in compound | Value | Unit   |
| Specific organ permeability         | Calculated              | 0     | cm/min |
| Specific intestinal permeability    | Calculated              | 0     | cm/min |

**Table 3.3:** Compound Configuration**Calculation methods**

| Category                | Calculation methods |
|-------------------------|---------------------|
| Partition coefficients  | PK-Sim Standard     |
| Cellular permeabilities | PK-Sim Standard     |

**Table 3.4:** Calculation methods**3.2.3 Administration****3.2.3.1 Bevacizumab\_human\_sim****Simple protocol**

Intravenous Infusion

Dosing interval: Single

Dose: 1.00 mg/kg

Infusion time: 90.00 min

**3.3 Charts**

### 3.3.1 Time Profile Analysis

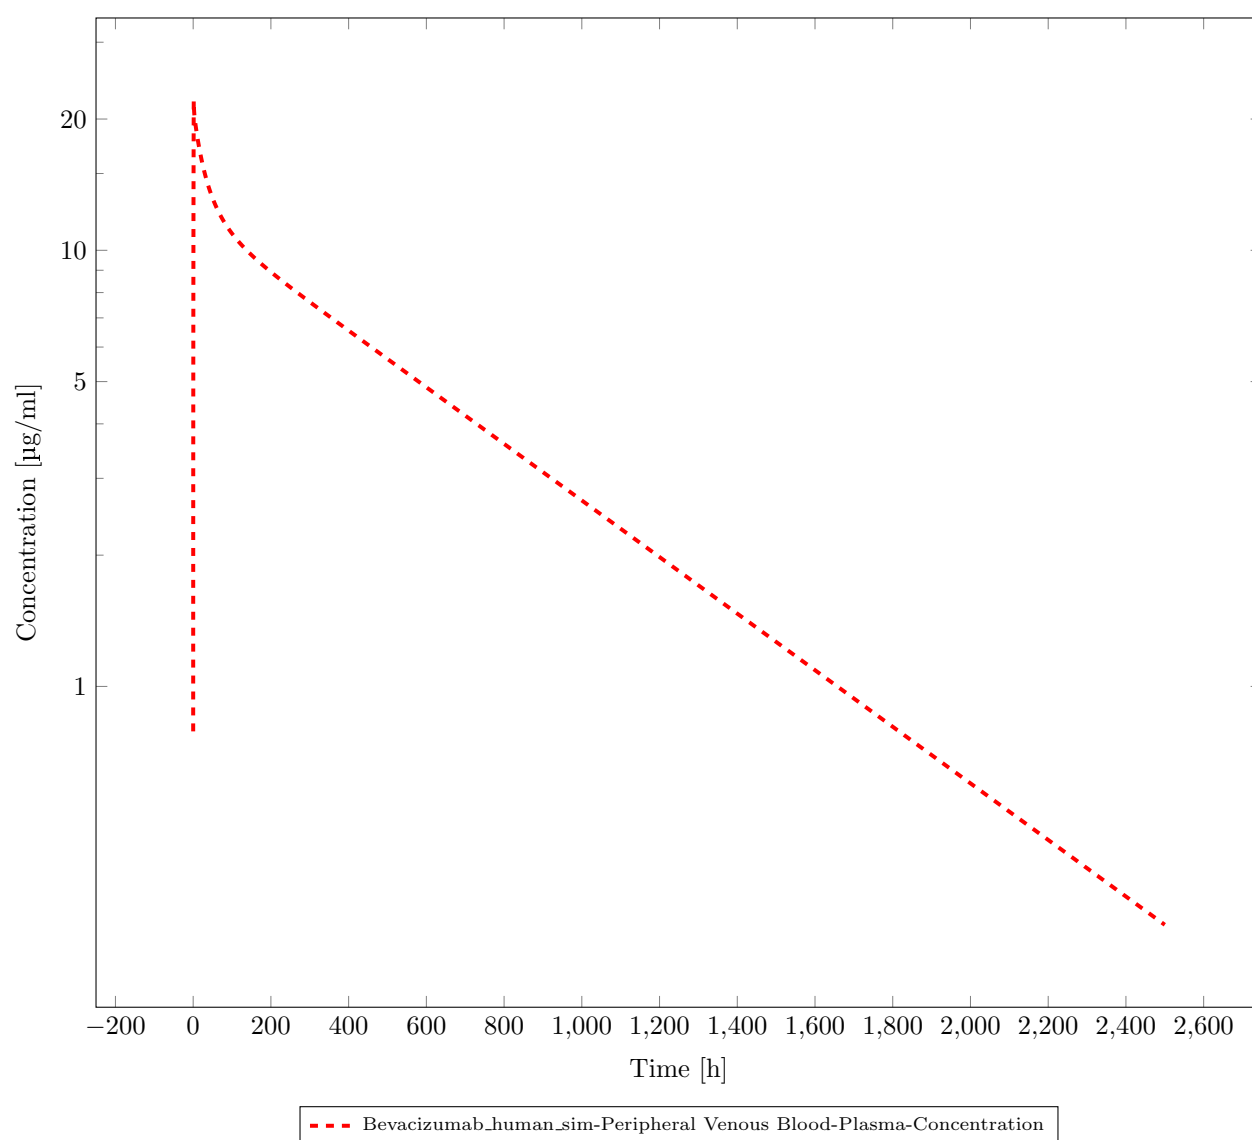

**Figure 3.1**

#### 3.3.1.1 Global PK-Analyses

| Parameter              | Compound              | Value                 | Unit      |
|------------------------|-----------------------|-----------------------|-----------|
| Vss (plasma)           | Bevacizumab_human_sim | 77.87                 | ml/kg     |
| Vd (plasma)            | Bevacizumab_human_sim | 80.88                 | ml/kg     |
| Vss (phys-chem)        | Bevacizumab_human_sim | 623.05                | ml/kg     |
| Total plasma clearance | Bevacizumab_human_sim | $2.01 \times 10^{-3}$ | ml/min/kg |

**Table 3.5:** Global PK-Analyses

#### 3.3.1.2 PK-Analyses

**Bevacizumab\_human\_sim-Peripheral Venous Blood-Plasma-Concentration**

| Parameter                    | Value                 | Unit       |
|------------------------------|-----------------------|------------|
| C <sub>max</sub>             | 0.15                  | μmol/l     |
| C <sub>max_norm</sub>        | $2.21 \times 10^7$    | mg/l       |
| t <sub>max</sub>             | 1.50                  | h          |
| C <sub>tEnd</sub>            | $1.89 \times 10^{-3}$ | μmol/l     |
| AUC <sub>tEnd</sub>          | 3235.50               | μmol*min/l |
| AUC <sub>tEnd_norm</sub>     | $4.85 \times 10^{14}$ | μg*min/l   |
| AUC <sub>inf</sub>           | 3311.59               | μmol*min/l |
| AUC <sub>inf_norm</sub>      | $4.97 \times 10^{14}$ | μg*min/l   |
| MRT                          | 644.69                | h          |
| Half-Life                    | 464.14                | h          |
| % AUC (t <sub>last</sub> -∞) | 0.02                  |            |
| Total body clearance/F       | $2.01 \times 10^{-3}$ | ml/min/kg  |
| V <sub>ss</sub> (plasma)/F   | 77.87                 | ml/kg      |
| V <sub>d</sub> (plasma)/F    | 80.88                 | ml/kg      |

**Table 3.6:** PK-Analyses for Bevacizumab\_human\_sim-Peripheral Venous Blood-Plasma-Concentration**Beva\_Demarchi2021\_HV\_1mpk..Human.iv perfusion.1.Bevacizumab\_human\_sim-Bevacizumab\_human\_sim-Measurement**

| Parameter                    | Value                 | Unit       |
|------------------------------|-----------------------|------------|
| C <sub>max</sub>             | 0.15                  | μmol/l     |
| C <sub>max_norm</sub>        | $2.30 \times 10^7$    | mg/l       |
| t <sub>max</sub>             | 4.86                  | h          |
| C <sub>tEnd</sub>            | $7.71 \times 10^{-5}$ | μmol/l     |
| AUC <sub>tEnd</sub>          | 2942.18               | μmol*min/l |
| AUC <sub>tEnd_norm</sub>     | $4.41 \times 10^{14}$ | μg*min/l   |
| AUC <sub>inf</sub>           | 2942.77               | μmol*min/l |
| AUC <sub>inf_norm</sub>      | $4.41 \times 10^{14}$ | μg*min/l   |
| MRT                          | 448.08                | h          |
| Half-Life                    | 89.57                 | h          |
| % AUC (t <sub>last</sub> -∞) | $2.03 \times 10^{-4}$ |            |
| Total body clearance/F       | $2.27 \times 10^{-3}$ | ml/min/kg  |
| V <sub>ss</sub> (plasma)/F   | 60.91                 | ml/kg      |
| V <sub>d</sub> (plasma)/F    | 17.56                 | ml/kg      |

**Table 3.7:** PK-Analyses for Beva\_Demarchi2021\_HV\_1mpk..Human.iv perfusion.1.Bevacizumab\_human\_sim-Bevacizumab\_human\_sim-Measurement**Beva\_Hetema2017\_HV\_1mpk..Human.iv perfusion.1.Bevacizumab\_human\_sim-Bevacizumab\_human\_sim-Measurement**

| Parameter                    | Value                 | Unit       |
|------------------------------|-----------------------|------------|
| C <sub>max</sub>             | 0.16                  | μmol/l     |
| C <sub>max_norm</sub>        | $2.45 \times 10^7$    | mg/l       |
| t <sub>max</sub>             | 0.64                  | h          |
| C <sub>tEnd</sub>            | $8.38 \times 10^{-3}$ | μmol/l     |
| AUC <sub>tEnd</sub>          | 2638.13               | μmol*min/l |
| AUC <sub>tEnd_norm</sub>     | $3.96 \times 10^{14}$ | μg*min/l   |
| AUC <sub>inf</sub>           | NaN                   | μmol*min/l |
| AUC <sub>inf_norm</sub>      | NaN                   | μg*min/l   |
| MRT                          | NaN                   | h          |
| Half-Life                    | Infinity              | h          |
| % AUC (t <sub>last</sub> -∞) | NaN                   |            |
| Total body clearance/F       | NaN                   | ml/min/kg  |
| V <sub>ss</sub> (plasma)/F   | NaN                   | ml/kg      |
| V <sub>d</sub> (plasma)/F    | NaN                   | ml/kg      |

**Table 3.8:** PK-Analyses for Beva\_Hetema2017\_HV\_1mpk..Human.iv perfusion.1.Bevacizumab\_human\_sim-Bevacizumab\_human\_sim-Measurement

**Beva\_Hummel2022\_HV\_1mpk..Human.iv perfusion.1.Bevacizumab\_human\_sim-Bevacizumab\_human\_sim-Measurement**

| Parameter                    | Value                 | Unit       |
|------------------------------|-----------------------|------------|
| C <sub>max</sub>             | 0.17                  | μmol/l     |
| C <sub>max_norm</sub>        | $2.50 \times 10^7$    | mg/l       |
| t <sub>max</sub>             | 1.50                  | h          |
| C <sub>tEnd</sub>            | $6.47 \times 10^{-4}$ | μmol/l     |
| AUC <sub>tEnd</sub>          | 3230.16               | μmol*min/l |
| AUC <sub>tEnd_norm</sub>     | $4.85 \times 10^{14}$ | μg*min/l   |
| AUC <sub>inf</sub>           | 3241.46               | μmol*min/l |
| AUC <sub>inf_norm</sub>      | $4.86 \times 10^{14}$ | μg*min/l   |
| MRT                          | 476.41                | h          |
| Half-Life                    | 201.77                | h          |
| % AUC (t <sub>last</sub> -∞) | $3.49 \times 10^{-3}$ |            |
| Total body clearance/F       | $2.06 \times 10^{-3}$ | ml/min/kg  |
| V <sub>ss</sub> (plasma)/F   | 58.79                 | ml/kg      |
| V <sub>d</sub> (plasma)/F    | 35.92                 | ml/kg      |

**Table 3.9:** PK-Analyses for Beva\_Hummel2022\_HV\_1mpk..Human.iv perfusion.1.Bevacizumab\_human\_sim-Bevacizumab\_human\_sim-Measurement

**Beva\_Wang2019\_HV\_1mpk..Human.iv perfusion.1.Bevacizumab\_human\_sim-Bevacizumab\_human\_sim-Measurement**

| Parameter                     | Value | Unit   |
|-------------------------------|-------|--------|
| C <sub>max</sub>              | 0.11  | μmol/l |
| <i>continued on next page</i> |       |        |

| <i>continued from previous page</i> |                       |            |
|-------------------------------------|-----------------------|------------|
| Parameter                           | Value                 | Unit       |
| C <sub>max</sub> _norm              | $1.70 \times 10^7$    | mg/l       |
| t <sub>max</sub>                    | 1.50                  | h          |
| C <sub>tEnd</sub>                   | $1.38 \times 10^{-3}$ | μmol/l     |
| AUC <sub>tEnd</sub>                 | 2209.27               | μmol*min/l |
| AUC <sub>tEnd</sub> _norm           | $3.31 \times 10^{14}$ | μg*min/l   |
| AUC <sub>inf</sub>                  | 6061.43               | μmol*min/l |
| AUC <sub>inf</sub> _norm            | $9.09 \times 10^{14}$ | μg*min/l   |
| MRT                                 | 31340.36              | h          |
| Half-Life                           | 32359.70              | h          |
| % AUC (t <sub>last</sub> -∞)        | 0.64                  |            |
| Total body clearance/F              | $1.10 \times 10^{-3}$ | ml/min/kg  |
| V <sub>ss</sub> (plasma)/F          | 2068.18               | ml/kg      |
| V <sub>d</sub> (plasma)/F           | 3080.80               | ml/kg      |

**Table 3.10:** PK-Analyses for Beva\_Wang2019\_HV\_1mpk..Human.iv perfusion.1.Bevacizumab\_human\_sim-Bevacizumab\_human\_sim-Measurement

**Beva\_wu2019\_HV\_1mpk..Human.iv perfusion.1.Bevacizumab\_human\_sim.1-Bevacizumab\_human\_-sim-Measurement**

| Parameter                    | Value                 | Unit       |
|------------------------------|-----------------------|------------|
| C <sub>max</sub>             | 0.17                  | μmol/l     |
| C <sub>max</sub> _norm       | $2.50 \times 10^7$    | mg/l       |
| t <sub>max</sub>             | 1.50                  | h          |
| C <sub>tEnd</sub>            | $1.18 \times 10^{-3}$ | μmol/l     |
| AUC <sub>tEnd</sub>          | 2779.89               | μmol*min/l |
| AUC <sub>tEnd</sub> _norm    | $4.17 \times 10^{14}$ | μg*min/l   |
| AUC <sub>inf</sub>           | 2821.02               | μmol*min/l |
| AUC <sub>inf</sub> _norm     | $4.23 \times 10^{14}$ | μg*min/l   |
| MRT                          | 532.48                | h          |
| Half-Life                    | 404.25                | h          |
| % AUC (t <sub>last</sub> -∞) | 0.01                  |            |
| Total body clearance/F       | $2.36 \times 10^{-3}$ | ml/min/kg  |
| V <sub>ss</sub> (plasma)/F   | 75.50                 | ml/kg      |
| V <sub>d</sub> (plasma)/F    | 82.70                 | ml/kg      |

**Table 3.11:** PK-Analyses for Beva\_wu2019\_HV\_1mpk..Human.iv perfusion.1.Bevacizumab\_human\_sim.1-Bevacizumab\_human\_sim-Measurement

**Beva\_wu2019\_HV\_1mpk..Human.iv perfusion.1.Bevacizumab\_human\_sim.2-Bevacizumab\_human\_-sim-Measurement**

| Parameter                     | Value | Unit   |
|-------------------------------|-------|--------|
| C <sub>max</sub>              | 0.12  | μmol/l |
| <i>continued on next page</i> |       |        |

| continued from previous page |                       |            |
|------------------------------|-----------------------|------------|
| Parameter                    | Value                 | Unit       |
| C_max_norm                   | $1.81 \times 10^7$    | mg/l       |
| t_max                        | 14.58                 | h          |
| C_tEnd                       | $2.20 \times 10^{-4}$ | μmol/l     |
| AUC_tEnd                     | 2257.21               | μmol*min/l |
| AUC_tEnd_norm                | $3.39 \times 10^{14}$ | μg*min/l   |
| AUC_inf                      | NaN                   | μmol*min/l |
| AUC_inf_norm                 | NaN                   | μg*min/l   |
| MRT                          | NaN                   | h          |
| Half-Life                    | Infinity              | h          |
| % AUC (tlast-∞)              | NaN                   |            |
| Total body clearance/F       | NaN                   | ml/min/kg  |
| Vss (plasma)/F               | NaN                   | ml/kg      |
| Vd (plasma)/F                | NaN                   | ml/kg      |

**Table 3.12:** PK-Analyses for Beva\_wu2019\_HV\_1mpk..Human.iv perfusion.1.Bevacizumab\_human\_sim.2-Bevacizumab\_human\_sim-Measurement

**Beva\_wu2019\_HV\_1mpk..Human.iv perfusion.1.Bevacizumab\_human\_sim.3-Bevacizumab\_human\_sim-Measurement**

| Parameter              | Value                 | Unit       |
|------------------------|-----------------------|------------|
| C_max                  | 0.12                  | μmol/l     |
| C_max_norm             | $1.81 \times 10^7$    | mg/l       |
| t_max                  | 14.58                 | h          |
| C_tEnd                 | $2.48 \times 10^{-3}$ | μmol/l     |
| AUC_tEnd               | 2995.12               | μmol*min/l |
| AUC_tEnd_norm          | $4.49 \times 10^{14}$ | μg*min/l   |
| AUC_inf                | NaN                   | μmol*min/l |
| AUC_inf_norm           | NaN                   | μg*min/l   |
| MRT                    | NaN                   | h          |
| Half-Life              | Infinity              | h          |
| % AUC (tlast-∞)        | NaN                   |            |
| Total body clearance/F | NaN                   | ml/min/kg  |
| Vss (plasma)/F         | NaN                   | ml/kg      |
| Vd (plasma)/F          | NaN                   | ml/kg      |

**Table 3.13:** PK-Analyses for Beva\_wu2019\_HV\_1mpk..Human.iv perfusion.1.Bevacizumab\_human\_sim.3-Bevacizumab\_human\_sim-Measurement

## Chapter 4

# Sim\_HV\_3mg/kg

### 4.1 Used building blocks

| Building Block | Name                                                |
|----------------|-----------------------------------------------------|
| Individual     | HV_sim (see section 1.2 in Part I)                  |
| Compound       | Bevacizumab_human_sim (see section 2.3 in Part I)   |
| Protocol       | Perfusion 90 min_3mg/kg (see section 3.3 in Part I) |

**Table 4.1:** Building Block

### 4.2 Simulation Properties

#### 4.2.1 Model Structure

Allow aging

No

#### Calculation methods

| Category                  | Calculation methods   |
|---------------------------|-----------------------|
| Endothelial surface areas | Organ vascularization |
| Body surface area         | Mosteller             |

**Table 4.2:** Calculation methods

#### 4.2.2 Compounds

##### 4.2.2.1 Bevacizumab\_human\_sim

#### Compound Configuration

| Parameter                                  | Alternative in compound | Value   | Unit      |
|--------------------------------------------|-------------------------|---------|-----------|
| Solubility                                 | Measurement             | 9999.00 | mg/l      |
| Lipophilicity                              | Measurement             | −5.00   | Log Units |
| Fraction unbound (plasma, reference value) | Measurement             | 1.00    |           |
| <i>continued on next page</i>              |                         |         |           |

| <i>continued from previous page</i> |                         |       |        |
|-------------------------------------|-------------------------|-------|--------|
| Parameter                           | Alternative in compound | Value | Unit   |
| Specific organ permeability         | Calculated              | 0     | cm/min |
| Specific intestinal permeability    | Calculated              | 0     | cm/min |

**Table 4.3:** Compound Configuration**Calculation methods**

| Category                | Calculation methods |
|-------------------------|---------------------|
| Partition coefficients  | PK-Sim Standard     |
| Cellular permeabilities | PK-Sim Standard     |

**Table 4.4:** Calculation methods**4.2.3 Administration****4.2.3.1 Bevacizumab\_human\_sim****Simple protocol**

Intravenous Infusion

Dosing interval: Single

Dose: 3.00 mg/kg

Infusion time: 90.00 min

**4.3 Charts**



### 4.3.1 Time Profile Analysis

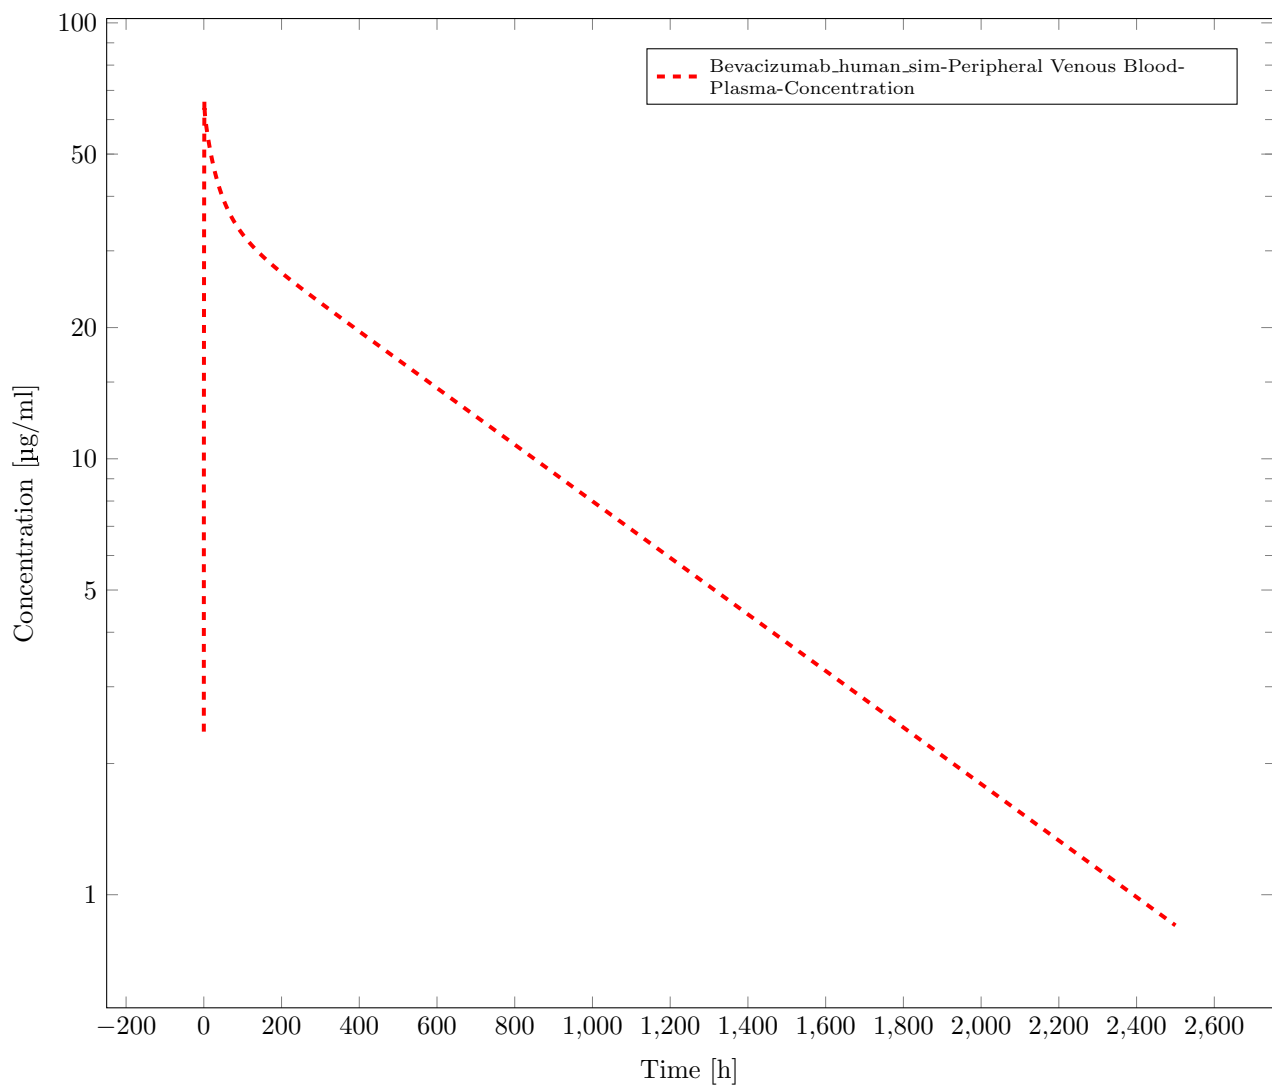

Figure 4.1

#### 4.3.1.1 Global PK-Analyses

| Parameter              | Compound              | Value                 | Unit      |
|------------------------|-----------------------|-----------------------|-----------|
| Vss (plasma)           | Bevacizumab_human_sim | 77.98                 | ml/kg     |
| Vd (plasma)            | Bevacizumab_human_sim | 81.01                 | ml/kg     |
| Vss (phys-chem)        | Bevacizumab_human_sim | 623.05                | ml/kg     |
| Total plasma clearance | Bevacizumab_human_sim | $2.02 \times 10^{-3}$ | ml/min/kg |

Table 4.5: Global PK-Analyses

#### 4.3.1.2 PK-Analyses

**Bevacizumab\_human\_sim-Peripheral Venous Blood-Plasma-Concentration**

| Parameter                    | Value                 | Unit       |
|------------------------------|-----------------------|------------|
| C <sub>max</sub>             | 0.44                  | μmol/l     |
| C <sub>max_norm</sub>        | $2.21 \times 10^7$    | mg/l       |
| t <sub>max</sub>             | 1.50                  | h          |
| C <sub>tEnd</sub>            | $5.67 \times 10^{-3}$ | μmol/l     |
| AUC <sub>tEnd</sub>          | 9690.83               | μmol*min/l |
| AUC <sub>tEnd_norm</sub>     | $4.85 \times 10^{14}$ | μg*min/l   |
| AUC <sub>inf</sub>           | 9918.62               | μmol*min/l |
| AUC <sub>inf_norm</sub>      | $4.96 \times 10^{14}$ | μg*min/l   |
| MRT                          | 644.51                | h          |
| Half-Life                    | 464.10                | h          |
| % AUC (t <sub>last</sub> -∞) | 0.02                  |            |
| Total body clearance/F       | $2.02 \times 10^{-3}$ | ml/min/kg  |
| V <sub>ss</sub> (plasma)/F   | 77.98                 | ml/kg      |
| V <sub>d</sub> (plasma)/F    | 81.01                 | ml/kg      |

**Table 4.6:** PK-Analyses for Bevacizumab\_human\_sim-Peripheral Venous Blood-Plasma-Concentration**Beva\_sinn2021\_HV\_3mpk..Human.iv perfusion.3.Bevacizumab\_human\_sim-Bevacizumab\_human\_sim-Measurement**

| Parameter                    | Value                 | Unit       |
|------------------------------|-----------------------|------------|
| C <sub>max</sub>             | 0.56                  | μmol/l     |
| C <sub>max_norm</sub>        | $2.78 \times 10^7$    | mg/l       |
| t <sub>max</sub>             | 0.94                  | h          |
| C <sub>tEnd</sub>            | $6.84 \times 10^{-3}$ | μmol/l     |
| AUC <sub>tEnd</sub>          | 13496.98              | μmol*min/l |
| AUC <sub>tEnd_norm</sub>     | $6.75 \times 10^{14}$ | μg*min/l   |
| AUC <sub>inf</sub>           | 13722.24              | μmol*min/l |
| AUC <sub>inf_norm</sub>      | $6.86 \times 10^{14}$ | μg*min/l   |
| MRT                          | 569.85                | h          |
| Half-Life                    | 380.52                | h          |
| % AUC (t <sub>last</sub> -∞) | 0.02                  |            |
| Total body clearance/F       | $1.46 \times 10^{-3}$ | ml/min/kg  |
| V <sub>ss</sub> (plasma)/F   | 49.83                 | ml/kg      |
| V <sub>d</sub> (plasma)/F    | 48.01                 | ml/kg      |

**Table 4.7:** PK-Analyses for Beva\_sinn2021\_HV\_3mpk..Human.iv perfusion.3.Bevacizumab\_human\_sim-Bevacizumab\_human\_sim-Measurement**Beva\_shin2020\_HV\_3mpk..Human.iv perfusion.3.Bevacizumab\_human\_sim.3-Bevacizumab\_human\_sim-Measurement**

| Parameter                    | Value                 | Unit       |
|------------------------------|-----------------------|------------|
| C <sub>max</sub>             | 0.39                  | μmol/l     |
| C <sub>max_norm</sub>        | $1.96 \times 10^7$    | mg/l       |
| t <sub>max</sub>             | 47.73                 | h          |
| C <sub>tEnd</sub>            | 0.02                  | μmol/l     |
| AUC <sub>tEnd</sub>          | 12330.29              | μmol*min/l |
| AUC <sub>tEnd_norm</sub>     | $6.17 \times 10^{14}$ | μg*min/l   |
| AUC <sub>inf</sub>           | NaN                   | μmol*min/l |
| AUC <sub>inf_norm</sub>      | NaN                   | μg*min/l   |
| MRT                          | NaN                   | h          |
| Half-Life                    | Infinity              | h          |
| % AUC (t <sub>last</sub> -∞) | NaN                   |            |
| Total body clearance/F       | NaN                   | ml/min/kg  |
| V <sub>ss</sub> (plasma)/F   | NaN                   | ml/kg      |
| V <sub>d</sub> (plasma)/F    | NaN                   | ml/kg      |

**Table 4.8:** PK-Analyses for Beva\_shin2020\_HV\_3mpk..Human.iv perfusion.3.Bevacizumab\_human\_sim.3-Bevacizumab\_human\_sim-Measurement

**Beva\_shin2020\_HV\_3mpk..Human.iv perfusion.3.Bevacizumab\_human\_sim.2-Bevacizumab\_human\_sim-Measurement**

| Parameter                    | Value                 | Unit       |
|------------------------------|-----------------------|------------|
| C <sub>max</sub>             | 0.27                  | μmol/l     |
| C <sub>max_norm</sub>        | $1.37 \times 10^7$    | mg/l       |
| t <sub>max</sub>             | 47.73                 | h          |
| C <sub>tEnd</sub>            | $7.79 \times 10^{-3}$ | μmol/l     |
| AUC <sub>tEnd</sub>          | 7591.91               | μmol*min/l |
| AUC <sub>tEnd_norm</sub>     | $3.80 \times 10^{14}$ | μg*min/l   |
| AUC <sub>inf</sub>           | NaN                   | μmol*min/l |
| AUC <sub>inf_norm</sub>      | NaN                   | μg*min/l   |
| MRT                          | NaN                   | h          |
| Half-Life                    | Infinity              | h          |
| % AUC (t <sub>last</sub> -∞) | NaN                   |            |
| Total body clearance/F       | NaN                   | ml/min/kg  |
| V <sub>ss</sub> (plasma)/F   | NaN                   | ml/kg      |
| V <sub>d</sub> (plasma)/F    | NaN                   | ml/kg      |

**Table 4.9:** PK-Analyses for Beva\_shin2020\_HV\_3mpk..Human.iv perfusion.3.Bevacizumab\_human\_sim.2-Bevacizumab\_human\_sim-Measurement

**Beva\_shin2020\_HV\_3mpk..Human.iv perfusion.3.Bevacizumab\_human\_sim.1-Bevacizumab\_human\_sim-Measurement**

| Parameter        | Value | Unit   |
|------------------|-------|--------|
| C <sub>max</sub> | 0.50  | μmol/l |

*continued on next page*

| continued from previous page |                       |            |
|------------------------------|-----------------------|------------|
| Parameter                    | Value                 | Unit       |
| C_max_norm                   | $2.51 \times 10^7$    | mg/l       |
| t_max                        | 1.50                  | h          |
| C_tEnd                       | 0.01                  | μmol/l     |
| AUC_tEnd                     | 11014.24              | μmol*min/l |
| AUC_tEnd_norm                | $5.51 \times 10^{14}$ | μg*min/l   |
| AUC_inf                      | NaN                   | μmol*min/l |
| AUC_inf_norm                 | NaN                   | μg*min/l   |
| MRT                          | NaN                   | h          |
| Half-Life                    | Infinity              | h          |
| % AUC (tlast-∞)              | NaN                   |            |
| Total body clearance/F       | NaN                   | ml/min/kg  |
| Vss (plasma)/F               | NaN                   | ml/kg      |
| Vd (plasma)/F                | NaN                   | ml/kg      |

**Table 4.10:** PK-Analyses for Beva\_shin2020\_HV\_3mpk..Human.iv perfusion.3.Bevacizumab\_human\_sim.1-Bevacizumab\_human\_sim-Measurement

# Chapter 5

## Sim\_HV\_0.5mg/kg

### 5.1 Used building blocks

| Building Block | Name                                                  |
|----------------|-------------------------------------------------------|
| Individual     | HV_sim (see section 1.2 in Part I)                    |
| Compound       | Bevacizumab_human_sim (see section 2.3 in Part I)     |
| Protocol       | Perfusion 90 min_0.5mg/kg (see section 3.4 in Part I) |

**Table 5.1:** Building Block

### 5.2 Simulation Properties

#### 5.2.1 Model Structure

Allow aging

No

#### Calculation methods

| Category                  | Calculation methods   |
|---------------------------|-----------------------|
| Endothelial surface areas | Organ vascularization |
| Body surface area         | Mosteller             |

**Table 5.2:** Calculation methods

#### 5.2.2 Compounds

##### 5.2.2.1 Bevacizumab\_human\_sim

#### Compound Configuration

| Parameter                                  | Alternative in compound | Value   | Unit      |
|--------------------------------------------|-------------------------|---------|-----------|
| Solubility                                 | Measurement             | 9999.00 | mg/l      |
| Lipophilicity                              | Measurement             | −5.00   | Log Units |
| Fraction unbound (plasma, reference value) | Measurement             | 1.00    |           |
| <i>continued on next page</i>              |                         |         |           |

| <i>continued from previous page</i> |                         |       |        |
|-------------------------------------|-------------------------|-------|--------|
| Parameter                           | Alternative in compound | Value | Unit   |
| Specific organ permeability         | Calculated              | 0     | cm/min |
| Specific intestinal permeability    | Calculated              | 0     | cm/min |

**Table 5.3:** Compound Configuration**Calculation methods**

| Category                | Calculation methods |
|-------------------------|---------------------|
| Partition coefficients  | PK-Sim Standard     |
| Cellular permeabilities | PK-Sim Standard     |

**Table 5.4:** Calculation methods**5.2.3 Administration****5.2.3.1 Bevacizumab\_human\_sim****Simple protocol**

Intravenous Infusion

Dosing interval: Single

Dose: 0.50 mg/kg

Infusion time: 90.00 min

**5.3 Charts**

### 5.3.1 Time Profile Analysis

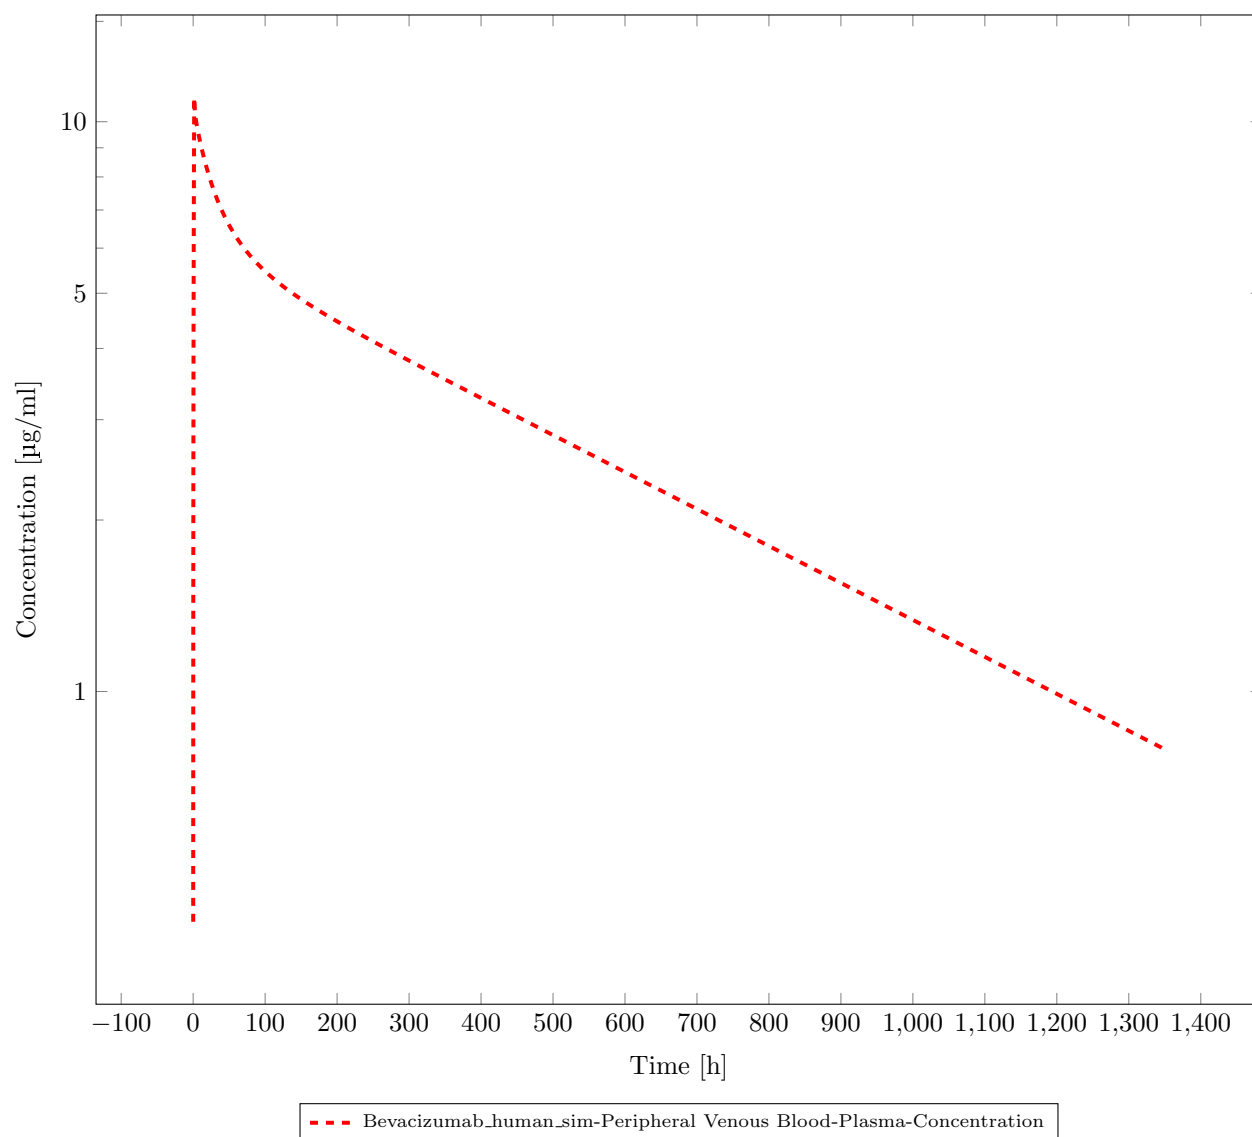

**Figure 5.1**

#### 5.3.1.1 Global PK-Analyses

| Parameter              | Compound              | Value                 | Unit      |
|------------------------|-----------------------|-----------------------|-----------|
| Vss (plasma)           | Bevacizumab_human_sim | 77.84                 | ml/kg     |
| Vd (plasma)            | Bevacizumab_human_sim | 80.84                 | ml/kg     |
| Vss (phys-chem)        | Bevacizumab_human_sim | 623.05                | ml/kg     |
| Total plasma clearance | Bevacizumab_human_sim | $2.01 \times 10^{-3}$ | ml/min/kg |

**Table 5.5:** Global PK-Analyses

#### 5.3.1.2 PK-Analyses

**Bevacizumab\_human\_sim-Peripheral Venous Blood-Plasma-Concentration**

| Parameter                    | Value                 | Unit       |
|------------------------------|-----------------------|------------|
| C <sub>max</sub>             | 0.07                  | μmol/l     |
| C <sub>max_norm</sub>        | $2.21 \times 10^7$    | mg/l       |
| t <sub>max</sub>             | 1.50                  | h          |
| C <sub>tEnd</sub>            | $5.28 \times 10^{-3}$ | μmol/l     |
| AUC <sub>tEnd</sub>          | 1444.42               | μmol*min/l |
| AUC <sub>tEnd_norm</sub>     | $4.33 \times 10^{14}$ | μg*min/l   |
| AUC <sub>inf</sub>           | 1656.48               | μmol*min/l |
| AUC <sub>inf_norm</sub>      | $4.97 \times 10^{14}$ | μg*min/l   |
| MRT                          | 644.74                | h          |
| Half-Life                    | 464.11                | h          |
| % AUC (t <sub>last</sub> -∞) | 0.13                  |            |
| Total body clearance/F       | $2.01 \times 10^{-3}$ | ml/min/kg  |
| V <sub>ss</sub> (plasma)/F   | 77.84                 | ml/kg      |
| V <sub>d</sub> (plasma)/F    | 80.84                 | ml/kg      |

**Table 5.6:** PK-Analyses for Bevacizumab\_human\_sim-Peripheral Venous Blood-Plasma-Concentration**Beva\_li2017\_HV\_0.5mpk..Human.iv perfusion.0.5.Bevacizumab\_human\_sim.1-Bevacizumab\_human\_sim-Measurement**

| Parameter                    | Value                 | Unit       |
|------------------------------|-----------------------|------------|
| C <sub>max</sub>             | 0.04                  | μmol/l     |
| C <sub>max_norm</sub>        | $1.35 \times 10^7$    | mg/l       |
| t <sub>max</sub>             | 2.00                  | h          |
| C <sub>tEnd</sub>            | $1.00 \times 10^{-3}$ | μmol/l     |
| AUC <sub>tEnd</sub>          | 889.66                | μmol*min/l |
| AUC <sub>tEnd_norm</sub>     | $2.67 \times 10^{14}$ | μg*min/l   |
| AUC <sub>inf</sub>           | NaN                   | μmol*min/l |
| AUC <sub>inf_norm</sub>      | NaN                   | μg*min/l   |
| MRT                          | NaN                   | h          |
| Half-Life                    | Infinity              | h          |
| % AUC (t <sub>last</sub> -∞) | NaN                   |            |
| Total body clearance/F       | NaN                   | ml/min/kg  |
| V <sub>ss</sub> (plasma)/F   | NaN                   | ml/kg      |
| V <sub>d</sub> (plasma)/F    | NaN                   | ml/kg      |

**Table 5.7:** PK-Analyses for Beva\_li2017\_HV\_0.5mpk..Human.iv perfusion.0.5.Bevacizumab\_human\_sim.1-Bevacizumab\_human\_sim-Measurement**Beva\_li2017\_HV\_0.5mpk..Human.iv perfusion.0.5.Bevacizumab\_human\_sim.2-Bevacizumab\_human\_sim-Measurement**



| Parameter                  | Value                 | Unit       |
|----------------------------|-----------------------|------------|
| C <sub>max</sub>           | 0.04                  | μmol/l     |
| C <sub>max_norm</sub>      | $1.12 \times 10^7$    | mg/l       |
| t <sub>max</sub>           | 2.00                  | h          |
| C <sub>tEnd</sub>          | $5.21 \times 10^{-4}$ | μmol/l     |
| AUC <sub>tEnd</sub>        | 538.67                | μmol*min/l |
| AUC <sub>tEnd_norm</sub>   | $1.62 \times 10^{14}$ | μg*min/l   |
| AUC <sub>inf</sub>         | NaN                   | μmol*min/l |
| AUC <sub>inf_norm</sub>    | NaN                   | μg*min/l   |
| MRT                        | NaN                   | h          |
| Half-Life                  | Infinity              | h          |
| % AUC (tlast-∞)            | NaN                   |            |
| Total body clearance/F     | NaN                   | ml/min/kg  |
| V <sub>ss</sub> (plasma)/F | NaN                   | ml/kg      |
| V <sub>d</sub> (plasma)/F  | NaN                   | ml/kg      |

**Table 5.8:** PK-Analyses for Beva\_li2017\_HV\_0.5mpk..Human.iv perfusion.0.5.Bevacizumab\_human\_sim.2-Bevacizumab\_human\_sim-Measurement

**Beva\_li2017\_HV\_0.5mpk..Human.iv perfusion.0.5.Bevacizumab\_human\_sim.3-Bevacizumab\_human\_sim-Measurement**

| Parameter                  | Value                 | Unit       |
|----------------------------|-----------------------|------------|
| C <sub>max</sub>           | 0.05                  | μmol/l     |
| C <sub>max_norm</sub>      | $1.63 \times 10^7$    | mg/l       |
| t <sub>max</sub>           | 2.00                  | h          |
| C <sub>tEnd</sub>          | $7.56 \times 10^{-4}$ | μmol/l     |
| AUC <sub>tEnd</sub>        | 1054.14               | μmol*min/l |
| AUC <sub>tEnd_norm</sub>   | $3.16 \times 10^{14}$ | μg*min/l   |
| AUC <sub>inf</sub>         | NaN                   | μmol*min/l |
| AUC <sub>inf_norm</sub>    | NaN                   | μg*min/l   |
| MRT                        | NaN                   | h          |
| Half-Life                  | Infinity              | h          |
| % AUC (tlast-∞)            | NaN                   |            |
| Total body clearance/F     | NaN                   | ml/min/kg  |
| V <sub>ss</sub> (plasma)/F | NaN                   | ml/kg      |
| V <sub>d</sub> (plasma)/F  | NaN                   | ml/kg      |

**Table 5.9:** PK-Analyses for Beva\_li2017\_HV\_0.5mpk..Human.iv perfusion.0.5.Bevacizumab\_human\_sim.3-Bevacizumab\_human\_sim-Measurement

**Beva\_li2017\_HV\_0.5mpk..Human.iv perfusion.0.5.Bevacizumab\_human\_sim.4-Bevacizumab\_human\_sim-Measurement**

| Parameter        | Value | Unit   |
|------------------|-------|--------|
| C <sub>max</sub> | 0.05  | μmol/l |

*continued on next page*

| continued from previous page |                       |            |
|------------------------------|-----------------------|------------|
| Parameter                    | Value                 | Unit       |
| C <sub>max</sub> _norm       | $1.50 \times 10^7$    | mg/l       |
| t <sub>max</sub>             | 2.00                  | h          |
| C <sub>tEnd</sub>            | $1.17 \times 10^{-3}$ | μmol/l     |
| AUC <sub>tEnd</sub>          | 914.90                | μmol*min/l |
| AUC <sub>tEnd</sub> _norm    | $2.74 \times 10^{14}$ | μg*min/l   |
| AUC <sub>inf</sub>           | NaN                   | μmol*min/l |
| AUC <sub>inf</sub> _norm     | NaN                   | μg*min/l   |
| MRT                          | NaN                   | h          |
| Half-Life                    | Infinity              | h          |
| % AUC (t <sub>last</sub> -∞) | NaN                   |            |
| Total body clearance/F       | NaN                   | ml/min/kg  |
| V <sub>ss</sub> (plasma)/F   | NaN                   | ml/kg      |
| V <sub>d</sub> (plasma)/F    | NaN                   | ml/kg      |

**Table 5.10:** PK-Analyses for Beva\_li2017\_HV\_0.5mpk..Human.iv perfusion.0.5.Bevacizumab\_human\_sim.4-Bevacizumab\_human\_sim-Measurement

Beva\_li2017\_HV\_0.5mpk..Human.iv perfusion.0.5.Bevacizumab\_human\_sim.5-Bevacizumab\_human\_sim-Measurement

| Parameter                    | Value                 | Unit       |
|------------------------------|-----------------------|------------|
| C <sub>max</sub>             | 0.05                  | μmol/l     |
| C <sub>max</sub> _norm       | $1.37 \times 10^7$    | mg/l       |
| t <sub>max</sub>             | 2.00                  | h          |
| C <sub>tEnd</sub>            | $1.08 \times 10^{-3}$ | μmol/l     |
| AUC <sub>tEnd</sub>          | 766.72                | μmol*min/l |
| AUC <sub>tEnd</sub> _norm    | $2.30 \times 10^{14}$ | μg*min/l   |
| AUC <sub>inf</sub>           | NaN                   | μmol*min/l |
| AUC <sub>inf</sub> _norm     | NaN                   | μg*min/l   |
| MRT                          | NaN                   | h          |
| Half-Life                    | Infinity              | h          |
| % AUC (t <sub>last</sub> -∞) | NaN                   |            |
| Total body clearance/F       | NaN                   | ml/min/kg  |
| V <sub>ss</sub> (plasma)/F   | NaN                   | ml/kg      |
| V <sub>d</sub> (plasma)/F    | NaN                   | ml/kg      |

**Table 5.11:** PK-Analyses for Beva\_li2017\_HV\_0.5mpk..Human.iv perfusion.0.5.Bevacizumab\_human\_sim.5-Bevacizumab\_human\_sim-Measurement

## Chapter 6

# Sim\_HV\_0.5mg/kg\_VEGF

### 6.1 Used building blocks

| Building Block | Name                                                  |
|----------------|-------------------------------------------------------|
| Individual     | HV_sim_VEGF (see section 1.3 in Part I)               |
| Compound       | Bevacizumab_human_sim (see section 2.3 in Part I)     |
| Protocol       | Perfusion 90 min_0.5mg/kg (see section 3.4 in Part I) |

**Table 6.1:** Building Block

### 6.2 Simulation Properties

#### 6.2.1 Model Structure

Allow aging

No

#### Calculation methods

| Category                  | Calculation methods   |
|---------------------------|-----------------------|
| Endothelial surface areas | Organ vascularization |
| Body surface area         | Mosteller             |

**Table 6.2:** Calculation methods

#### 6.2.2 Compounds

##### 6.2.2.1 Bevacizumab\_human\_sim

#### Compound Configuration

| Parameter                                  | Alternative in compound | Value   | Unit      |
|--------------------------------------------|-------------------------|---------|-----------|
| Solubility                                 | Measurement             | 9999.00 | mg/l      |
| Lipophilicity                              | Measurement             | −5.00   | Log Units |
| Fraction unbound (plasma, reference value) | Measurement             | 1.00    |           |
| <i>continued on next page</i>              |                         |         |           |

| continued from previous page     |                         |       |        |
|----------------------------------|-------------------------|-------|--------|
| Parameter                        | Alternative in compound | Value | Unit   |
| Specific organ permeability      | Calculated              | 0     | cm/min |
| Specific intestinal permeability | Calculated              | 0     | cm/min |

Table 6.3: Compound Configuration

### Calculation methods

| Category                | Calculation methods |
|-------------------------|---------------------|
| Partition coefficients  | PK-Sim Standard     |
| Cellular permeabilities | PK-Sim Standard     |

Table 6.4: Calculation methods

## 6.2.3 Processes

### 6.2.3.1 Bevacizumab\_human\_sim

#### Specific Binding

Mapping VEGFA with VEGFA-Paper

## 6.2.4 Administration

### 6.2.4.1 Bevacizumab\_human\_sim

#### Simple protocol

Intravenous Infusion

Dosing interval: Single

Dose: 0.50 mg/kg

Infusion time: 90.00 min

## 6.3 Charts

### 6.3.1 Time Profile Analysis

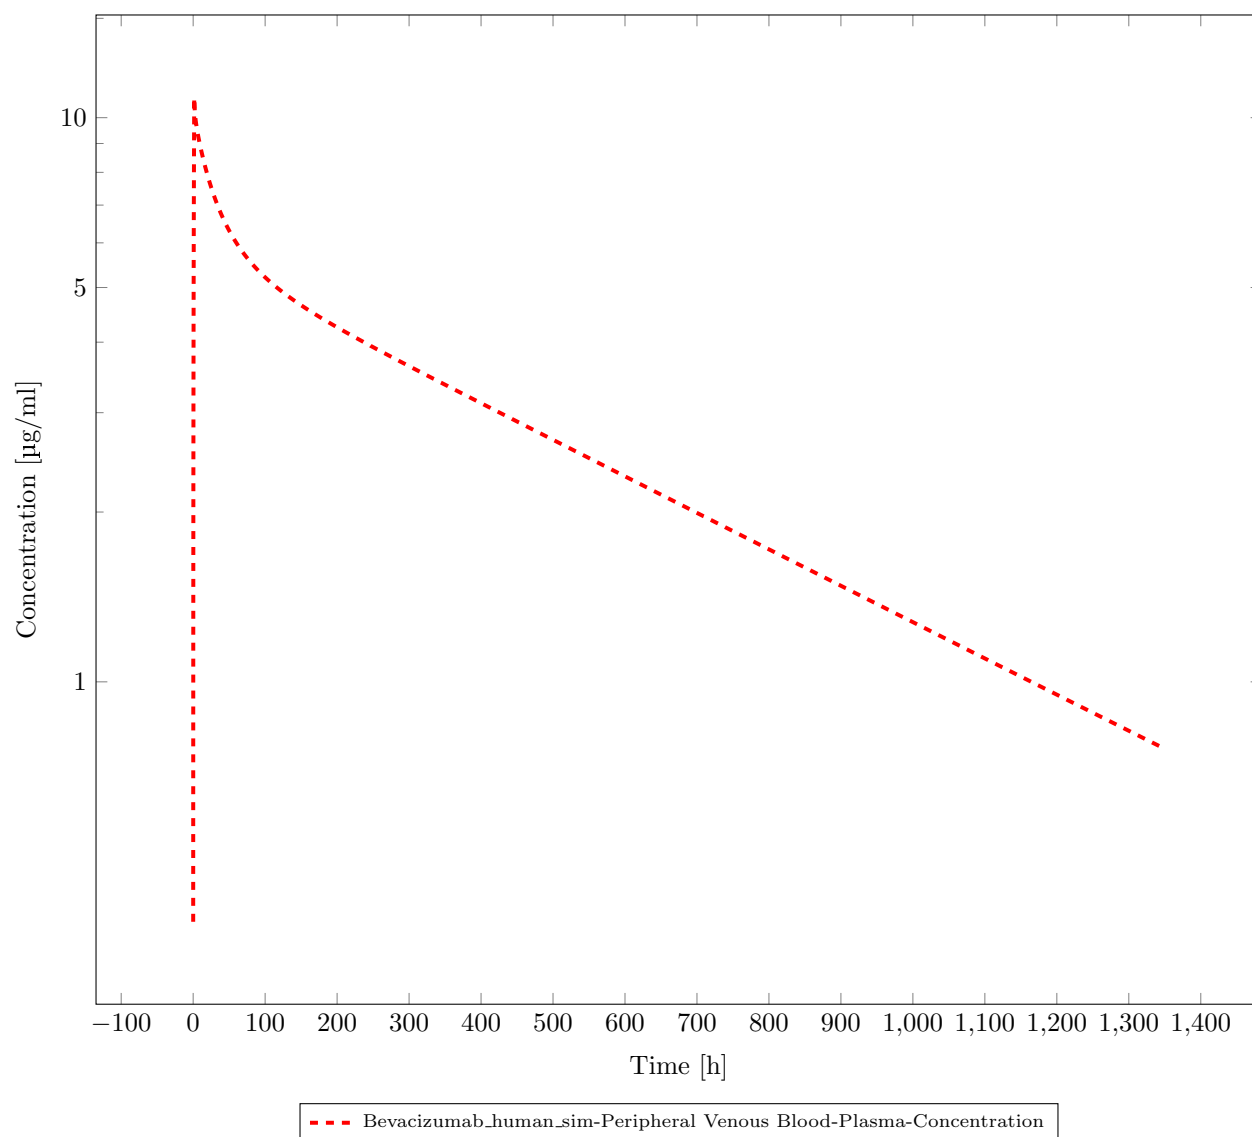

**Figure 6.1**

#### 6.3.1.1 Global PK-Analyses

| Parameter              | Compound              | Value                 | Unit      |
|------------------------|-----------------------|-----------------------|-----------|
| Vss (plasma)           | Bevacizumab_human_sim | 81.96                 | ml/kg     |
| Vd (plasma)            | Bevacizumab_human_sim | 85.87                 | ml/kg     |
| Vss (phys-chem)        | Bevacizumab_human_sim | 623.05                | ml/kg     |
| Total plasma clearance | Bevacizumab_human_sim | $2.10 \times 10^{-3}$ | ml/min/kg |

**Table 6.5:** Global PK-Analyses

#### 6.3.1.2 PK-Analyses

**Bevacizumab\_human\_sim-Peripheral Venous Blood-Plasma-Concentration**

| Parameter                    | Value                 | Unit       |
|------------------------------|-----------------------|------------|
| C <sub>max</sub>             | 0.07                  | μmol/l     |
| C <sub>max_norm</sub>        | $2.17 \times 10^7$    | mg/l       |
| t <sub>max</sub>             | 1.50                  | h          |
| C <sub>tEnd</sub>            | $5.07 \times 10^{-3}$ | μmol/l     |
| AUC <sub>tEnd</sub>          | 1379.55               | μmol*min/l |
| AUC <sub>tEnd_norm</sub>     | $4.14 \times 10^{14}$ | μg*min/l   |
| AUC <sub>inf</sub>           | 1586.95               | μmol*min/l |
| AUC <sub>inf_norm</sub>      | $4.76 \times 10^{14}$ | μg*min/l   |
| MRT                          | 650.30                | h          |
| Half-Life                    | 472.26                | h          |
| % AUC (t <sub>last</sub> -∞) | 0.13                  |            |
| Total body clearance/F       | $2.10 \times 10^{-3}$ | ml/min/kg  |
| V <sub>ss</sub> (plasma)/F   | 81.96                 | ml/kg      |
| V <sub>d</sub> (plasma)/F    | 85.87                 | ml/kg      |

**Table 6.6:** PK-Analyses for Bevacizumab\_human\_sim-Peripheral Venous Blood-Plasma-Concentration**Beva\_li2017\_HV\_0.5mpk..Human.iv perfusion.0.5.Bevacizumab\_human\_sim.1-Bevacizumab\_human\_sim-Measurement**

| Parameter                    | Value                 | Unit       |
|------------------------------|-----------------------|------------|
| C <sub>max</sub>             | 0.04                  | μmol/l     |
| C <sub>max_norm</sub>        | $1.35 \times 10^7$    | mg/l       |
| t <sub>max</sub>             | 2.00                  | h          |
| C <sub>tEnd</sub>            | $1.00 \times 10^{-3}$ | μmol/l     |
| AUC <sub>tEnd</sub>          | 889.66                | μmol*min/l |
| AUC <sub>tEnd_norm</sub>     | $2.67 \times 10^{14}$ | μg*min/l   |
| AUC <sub>inf</sub>           | NaN                   | μmol*min/l |
| AUC <sub>inf_norm</sub>      | NaN                   | μg*min/l   |
| MRT                          | NaN                   | h          |
| Half-Life                    | Infinity              | h          |
| % AUC (t <sub>last</sub> -∞) | NaN                   |            |
| Total body clearance/F       | NaN                   | ml/min/kg  |
| V <sub>ss</sub> (plasma)/F   | NaN                   | ml/kg      |
| V <sub>d</sub> (plasma)/F    | NaN                   | ml/kg      |

**Table 6.7:** PK-Analyses for Beva\_li2017\_HV\_0.5mpk..Human.iv perfusion.0.5.Bevacizumab\_human\_sim.1-Bevacizumab\_human\_sim-Measurement**Beva\_li2017\_HV\_0.5mpk..Human.iv perfusion.0.5.Bevacizumab\_human\_sim.2-Bevacizumab\_human\_sim-Measurement**

| Parameter                  | Value                 | Unit       |
|----------------------------|-----------------------|------------|
| C <sub>max</sub>           | 0.04                  | μmol/l     |
| C <sub>max_norm</sub>      | $1.12 \times 10^7$    | mg/l       |
| t <sub>max</sub>           | 2.00                  | h          |
| C <sub>tEnd</sub>          | $5.21 \times 10^{-4}$ | μmol/l     |
| AUC <sub>tEnd</sub>        | 538.67                | μmol*min/l |
| AUC <sub>tEnd_norm</sub>   | $1.62 \times 10^{14}$ | μg*min/l   |
| AUC <sub>inf</sub>         | NaN                   | μmol*min/l |
| AUC <sub>inf_norm</sub>    | NaN                   | μg*min/l   |
| MRT                        | NaN                   | h          |
| Half-Life                  | Infinity              | h          |
| % AUC (tlast-∞)            | NaN                   |            |
| Total body clearance/F     | NaN                   | ml/min/kg  |
| V <sub>ss</sub> (plasma)/F | NaN                   | ml/kg      |
| V <sub>d</sub> (plasma)/F  | NaN                   | ml/kg      |

**Table 6.8:** PK-Analyses for Beva\_li2017\_HV\_0.5mpk..Human.iv perfusion.0.5.Bevacizumab\_human\_sim.2-Bevacizumab\_human\_sim-Measurement

**Beva\_li2017\_HV\_0.5mpk..Human.iv perfusion.0.5.Bevacizumab\_human\_sim.3-Bevacizumab\_human\_sim-Measurement**

| Parameter                  | Value                 | Unit       |
|----------------------------|-----------------------|------------|
| C <sub>max</sub>           | 0.05                  | μmol/l     |
| C <sub>max_norm</sub>      | $1.63 \times 10^7$    | mg/l       |
| t <sub>max</sub>           | 2.00                  | h          |
| C <sub>tEnd</sub>          | $7.56 \times 10^{-4}$ | μmol/l     |
| AUC <sub>tEnd</sub>        | 1054.14               | μmol*min/l |
| AUC <sub>tEnd_norm</sub>   | $3.16 \times 10^{14}$ | μg*min/l   |
| AUC <sub>inf</sub>         | NaN                   | μmol*min/l |
| AUC <sub>inf_norm</sub>    | NaN                   | μg*min/l   |
| MRT                        | NaN                   | h          |
| Half-Life                  | Infinity              | h          |
| % AUC (tlast-∞)            | NaN                   |            |
| Total body clearance/F     | NaN                   | ml/min/kg  |
| V <sub>ss</sub> (plasma)/F | NaN                   | ml/kg      |
| V <sub>d</sub> (plasma)/F  | NaN                   | ml/kg      |

**Table 6.9:** PK-Analyses for Beva\_li2017\_HV\_0.5mpk..Human.iv perfusion.0.5.Bevacizumab\_human\_sim.3-Bevacizumab\_human\_sim-Measurement

**Beva\_li2017\_HV\_0.5mpk..Human.iv perfusion.0.5.Bevacizumab\_human\_sim.4-Bevacizumab\_human\_sim-Measurement**

| Parameter        | Value | Unit   |
|------------------|-------|--------|
| C <sub>max</sub> | 0.05  | μmol/l |

*continued on next page*

| continued from previous page |                       |            |
|------------------------------|-----------------------|------------|
| Parameter                    | Value                 | Unit       |
| C <sub>max</sub> _norm       | $1.50 \times 10^7$    | mg/l       |
| t <sub>max</sub>             | 2.00                  | h          |
| C <sub>tEnd</sub>            | $1.17 \times 10^{-3}$ | μmol/l     |
| AUC <sub>tEnd</sub>          | 914.90                | μmol*min/l |
| AUC <sub>tEnd</sub> _norm    | $2.74 \times 10^{14}$ | μg*min/l   |
| AUC <sub>inf</sub>           | NaN                   | μmol*min/l |
| AUC <sub>inf</sub> _norm     | NaN                   | μg*min/l   |
| MRT                          | NaN                   | h          |
| Half-Life                    | Infinity              | h          |
| % AUC (tlast-∞)              | NaN                   |            |
| Total body clearance/F       | NaN                   | ml/min/kg  |
| V <sub>ss</sub> (plasma)/F   | NaN                   | ml/kg      |
| V <sub>d</sub> (plasma)/F    | NaN                   | ml/kg      |

**Table 6.10:** PK-Analyses for Beva\_li2017\_HV\_0.5mpk..Human.iv perfusion.0.5.Bevacizumab\_human\_sim.4-Bevacizumab\_human\_sim-Measurement

**Beva\_li2017\_HV\_0.5mpk..Human.iv perfusion.0.5.Bevacizumab\_human\_sim.5-Bevacizumab\_human\_sim-Measurement**

| Parameter                  | Value                 | Unit       |
|----------------------------|-----------------------|------------|
| C <sub>max</sub>           | 0.05                  | μmol/l     |
| C <sub>max</sub> _norm     | $1.37 \times 10^7$    | mg/l       |
| t <sub>max</sub>           | 2.00                  | h          |
| C <sub>tEnd</sub>          | $1.08 \times 10^{-3}$ | μmol/l     |
| AUC <sub>tEnd</sub>        | 766.72                | μmol*min/l |
| AUC <sub>tEnd</sub> _norm  | $2.30 \times 10^{14}$ | μg*min/l   |
| AUC <sub>inf</sub>         | NaN                   | μmol*min/l |
| AUC <sub>inf</sub> _norm   | NaN                   | μg*min/l   |
| MRT                        | NaN                   | h          |
| Half-Life                  | Infinity              | h          |
| % AUC (tlast-∞)            | NaN                   |            |
| Total body clearance/F     | NaN                   | ml/min/kg  |
| V <sub>ss</sub> (plasma)/F | NaN                   | ml/kg      |
| V <sub>d</sub> (plasma)/F  | NaN                   | ml/kg      |

**Table 6.11:** PK-Analyses for Beva\_li2017\_HV\_0.5mpk..Human.iv perfusion.0.5.Bevacizumab\_human\_sim.5-Bevacizumab\_human\_sim-Measurement



## Chapter 7

# Sim\_HV\_1mg/kg\_VEGF

### 7.1 Used building blocks

| Building Block | Name                                                |
|----------------|-----------------------------------------------------|
| Individual     | HV_sim_VEGF (see section 1.3 in Part I)             |
| Compound       | Bevacizumab_human_sim (see section 2.3 in Part I)   |
| Protocol       | Perfusion 90 min_1mg/kg (see section 3.2 in Part I) |

**Table 7.1:** Building Block

### 7.2 Simulation Properties

#### 7.2.1 Model Structure

Allow aging

No

#### Calculation methods

| Category                  | Calculation methods   |
|---------------------------|-----------------------|
| Endothelial surface areas | Organ vascularization |
| Body surface area         | Mosteller             |

**Table 7.2:** Calculation methods

#### 7.2.2 Compounds

##### 7.2.2.1 Bevacizumab\_human\_sim

#### Compound Configuration

| Parameter                                  | Alternative in compound | Value   | Unit      |
|--------------------------------------------|-------------------------|---------|-----------|
| Solubility                                 | Measurement             | 9999.00 | mg/l      |
| Lipophilicity                              | Measurement             | −5.00   | Log Units |
| Fraction unbound (plasma, reference value) | Measurement             | 1.00    |           |
| <i>continued on next page</i>              |                         |         |           |

| continued from previous page     |                         |       |        |
|----------------------------------|-------------------------|-------|--------|
| Parameter                        | Alternative in compound | Value | Unit   |
| Specific organ permeability      | Calculated              | 0     | cm/min |
| Specific intestinal permeability | Calculated              | 0     | cm/min |

Table 7.3: Compound Configuration

### Calculation methods

| Category                | Calculation methods |
|-------------------------|---------------------|
| Partition coefficients  | PK-Sim Standard     |
| Cellular permeabilities | PK-Sim Standard     |

Table 7.4: Calculation methods

## 7.2.3 Processes

### 7.2.3.1 Bevacizumab\_human\_sim

#### Specific Binding

Mapping VEGFA with VEGFA-Paper

## 7.2.4 Administration

### 7.2.4.1 Bevacizumab\_human\_sim

#### Simple protocol

Intravenous Infusion

Dosing interval: Single

Dose: 1.00 mg/kg

Infusion time: 90.00 min

## 7.3 Charts

### 7.3.1 Time Profile Analysis

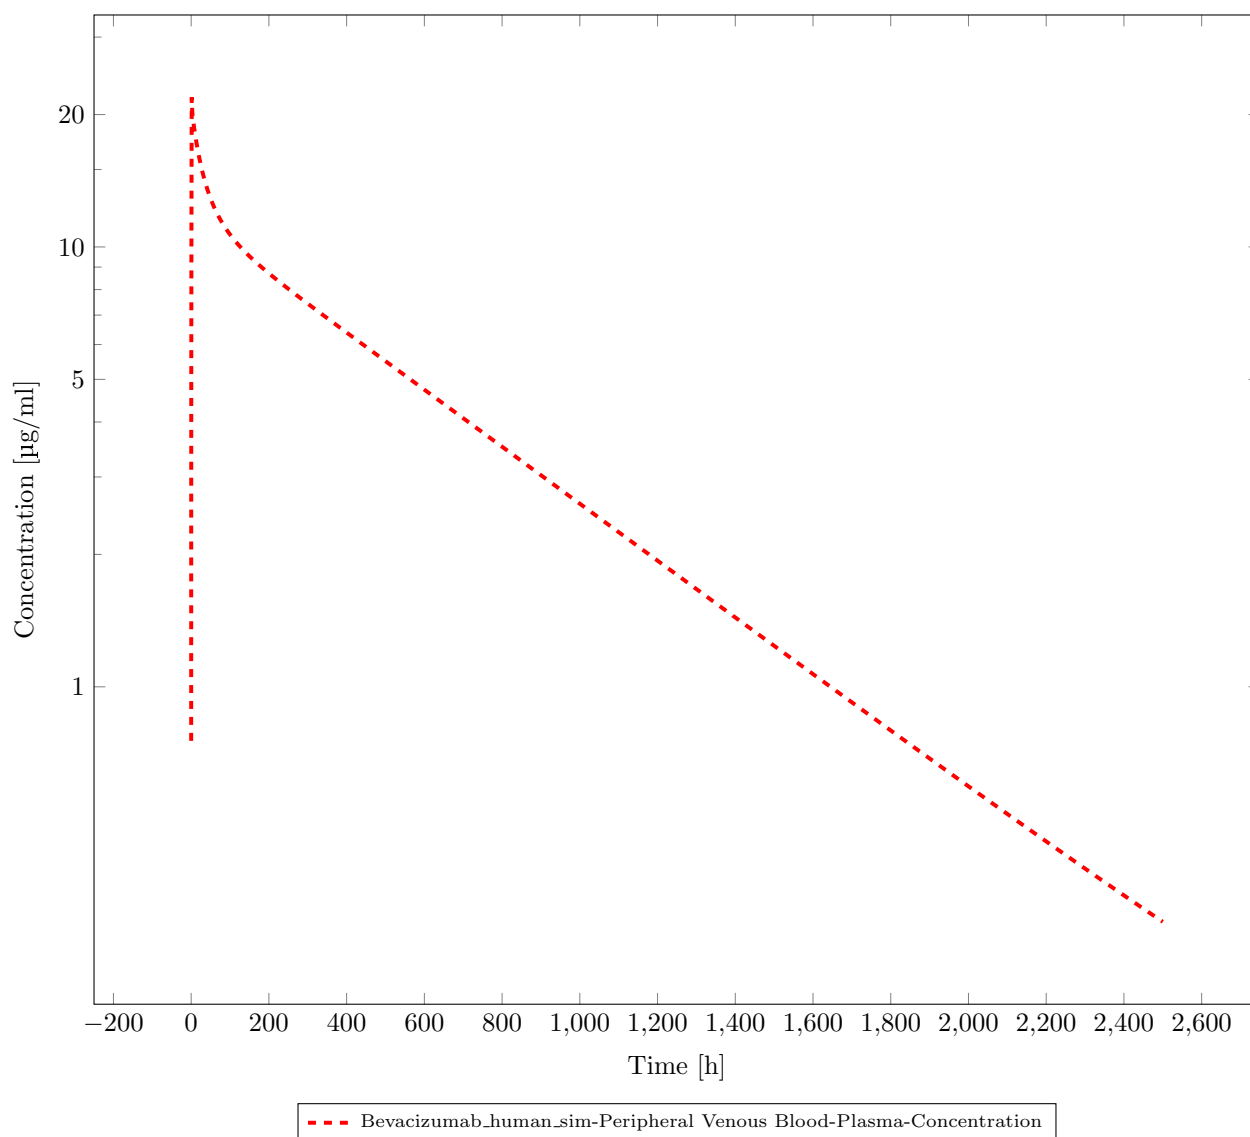

**Figure 7.1**

#### 7.3.1.1 Global PK-Analyses

| Parameter              | Compound              | Value                 | Unit      |
|------------------------|-----------------------|-----------------------|-----------|
| Vss (plasma)           | Bevacizumab_human_sim | 80.74                 | ml/kg     |
| Vd (plasma)            | Bevacizumab_human_sim | 89.79                 | ml/kg     |
| Vss (phys-chem)        | Bevacizumab_human_sim | 623.05                | ml/kg     |
| Total plasma clearance | Bevacizumab_human_sim | $2.05 \times 10^{-3}$ | ml/min/kg |

**Table 7.5:** Global PK-Analyses

#### 7.3.1.2 PK-Analyses

**Bevacizumab\_human\_sim-Peripheral Venous Blood-Plasma-Concentration**

| Parameter                    | Value                 | Unit       |
|------------------------------|-----------------------|------------|
| C <sub>max</sub>             | 0.15                  | μmol/l     |
| C <sub>max_norm</sub>        | $2.19 \times 10^7$    | mg/l       |
| t <sub>max</sub>             | 1.50                  | h          |
| C <sub>tEnd</sub>            | $1.95 \times 10^{-3}$ | μmol/l     |
| AUC <sub>tEnd</sub>          | 3165.25               | μmol*min/l |
| AUC <sub>tEnd_norm</sub>     | $4.75 \times 10^{14}$ | μg*min/l   |
| AUC <sub>inf</sub>           | 3250.56               | μmol*min/l |
| AUC <sub>inf_norm</sub>      | $4.88 \times 10^{14}$ | μg*min/l   |
| MRT                          | 656.16                | h          |
| Half-Life                    | 505.79                | h          |
| % AUC (t <sub>last</sub> -∞) | 0.03                  |            |
| Total body clearance/F       | $2.05 \times 10^{-3}$ | ml/min/kg  |
| V <sub>ss</sub> (plasma)/F   | 80.74                 | ml/kg      |
| V <sub>d</sub> (plasma)/F    | 89.79                 | ml/kg      |

**Table 7.6:** PK-Analyses for Bevacizumab\_human\_sim-Peripheral Venous Blood-Plasma-Concentration**Beva\_Demarchi2021\_HV\_1mpk..Human.iv perfusion.1.Bevacizumab\_human\_sim-Bevacizumab\_human\_sim-Measurement**

| Parameter                    | Value                 | Unit       |
|------------------------------|-----------------------|------------|
| C <sub>max</sub>             | 0.15                  | μmol/l     |
| C <sub>max_norm</sub>        | $2.30 \times 10^7$    | mg/l       |
| t <sub>max</sub>             | 4.86                  | h          |
| C <sub>tEnd</sub>            | $7.71 \times 10^{-5}$ | μmol/l     |
| AUC <sub>tEnd</sub>          | 2942.18               | μmol*min/l |
| AUC <sub>tEnd_norm</sub>     | $4.41 \times 10^{14}$ | μg*min/l   |
| AUC <sub>inf</sub>           | 2942.77               | μmol*min/l |
| AUC <sub>inf_norm</sub>      | $4.41 \times 10^{14}$ | μg*min/l   |
| MRT                          | 448.08                | h          |
| Half-Life                    | 89.57                 | h          |
| % AUC (t <sub>last</sub> -∞) | $2.03 \times 10^{-4}$ |            |
| Total body clearance/F       | $2.27 \times 10^{-3}$ | ml/min/kg  |
| V <sub>ss</sub> (plasma)/F   | 60.91                 | ml/kg      |
| V <sub>d</sub> (plasma)/F    | 17.56                 | ml/kg      |

**Table 7.7:** PK-Analyses for Beva\_Demarchi2021\_HV\_1mpk..Human.iv perfusion.1.Bevacizumab\_human\_sim-Bevacizumab\_human\_sim-Measurement**Beva\_Hetema2017\_HV\_1mpk..Human.iv perfusion.1.Bevacizumab\_human\_sim-Bevacizumab\_human\_sim-Measurement**

| Parameter                    | Value                 | Unit       |
|------------------------------|-----------------------|------------|
| C <sub>max</sub>             | 0.16                  | μmol/l     |
| C <sub>max_norm</sub>        | $2.45 \times 10^7$    | mg/l       |
| t <sub>max</sub>             | 0.64                  | h          |
| C <sub>tEnd</sub>            | $8.38 \times 10^{-3}$ | μmol/l     |
| AUC <sub>tEnd</sub>          | 2638.13               | μmol*min/l |
| AUC <sub>tEnd_norm</sub>     | $3.96 \times 10^{14}$ | μg*min/l   |
| AUC <sub>inf</sub>           | NaN                   | μmol*min/l |
| AUC <sub>inf_norm</sub>      | NaN                   | μg*min/l   |
| MRT                          | NaN                   | h          |
| Half-Life                    | Infinity              | h          |
| % AUC (t <sub>last</sub> -∞) | NaN                   |            |
| Total body clearance/F       | NaN                   | ml/min/kg  |
| V <sub>ss</sub> (plasma)/F   | NaN                   | ml/kg      |
| V <sub>d</sub> (plasma)/F    | NaN                   | ml/kg      |

**Table 7.8:** PK-Analyses for Beva\_Hetema2017\_HV\_1mpk..Human.iv perfusion.1.Bevacizumab\_human\_sim-Bevacizumab\_human\_sim-Measurement

**Beva\_Hummel2022\_HV\_1mpk..Human.iv perfusion.1.Bevacizumab\_human\_sim-Bevacizumab\_human\_sim-Measurement**

| Parameter                    | Value                 | Unit       |
|------------------------------|-----------------------|------------|
| C <sub>max</sub>             | 0.17                  | μmol/l     |
| C <sub>max_norm</sub>        | $2.50 \times 10^7$    | mg/l       |
| t <sub>max</sub>             | 1.50                  | h          |
| C <sub>tEnd</sub>            | $6.47 \times 10^{-4}$ | μmol/l     |
| AUC <sub>tEnd</sub>          | 3230.16               | μmol*min/l |
| AUC <sub>tEnd_norm</sub>     | $4.85 \times 10^{14}$ | μg*min/l   |
| AUC <sub>inf</sub>           | 3241.46               | μmol*min/l |
| AUC <sub>inf_norm</sub>      | $4.86 \times 10^{14}$ | μg*min/l   |
| MRT                          | 476.41                | h          |
| Half-Life                    | 201.77                | h          |
| % AUC (t <sub>last</sub> -∞) | $3.49 \times 10^{-3}$ |            |
| Total body clearance/F       | $2.06 \times 10^{-3}$ | ml/min/kg  |
| V <sub>ss</sub> (plasma)/F   | 58.79                 | ml/kg      |
| V <sub>d</sub> (plasma)/F    | 35.92                 | ml/kg      |

**Table 7.9:** PK-Analyses for Beva\_Hummel2022\_HV\_1mpk..Human.iv perfusion.1.Bevacizumab\_human\_sim-Bevacizumab\_human\_sim-Measurement

**Beva\_Wang2019\_HV\_1mpk..Human.iv perfusion.1.Bevacizumab\_human\_sim-Bevacizumab\_human\_sim-Measurement**

| Parameter                     | Value | Unit   |
|-------------------------------|-------|--------|
| C <sub>max</sub>              | 0.11  | μmol/l |
| <i>continued on next page</i> |       |        |

| <i>continued from previous page</i> |                       |            |
|-------------------------------------|-----------------------|------------|
| Parameter                           | Value                 | Unit       |
| C <sub>max</sub> _norm              | $1.70 \times 10^7$    | mg/l       |
| t <sub>max</sub>                    | 1.50                  | h          |
| C <sub>tEnd</sub>                   | $1.38 \times 10^{-3}$ | μmol/l     |
| AUC <sub>tEnd</sub>                 | 2209.27               | μmol*min/l |
| AUC <sub>tEnd</sub> _norm           | $3.31 \times 10^{14}$ | μg*min/l   |
| AUC <sub>inf</sub>                  | 6061.43               | μmol*min/l |
| AUC <sub>inf</sub> _norm            | $9.09 \times 10^{14}$ | μg*min/l   |
| MRT                                 | 31340.36              | h          |
| Half-Life                           | 32359.70              | h          |
| % AUC (t <sub>last</sub> -∞)        | 0.64                  |            |
| Total body clearance/F              | $1.10 \times 10^{-3}$ | ml/min/kg  |
| V <sub>ss</sub> (plasma)/F          | 2068.18               | ml/kg      |
| V <sub>d</sub> (plasma)/F           | 3080.80               | ml/kg      |

**Table 7.10:** PK-Analyses for Beva\_Wang2019\_HV\_1mpk..Human.iv perfusion.1.Bevacizumab\_human\_sim-Bevacizumab\_human\_sim-Measurement

**Beva\_wu2019\_HV\_1mpk..Human.iv perfusion.1.Bevacizumab\_human\_sim.1-Bevacizumab\_human\_-sim-Measurement**

| Parameter                    | Value                 | Unit       |
|------------------------------|-----------------------|------------|
| C <sub>max</sub>             | 0.17                  | μmol/l     |
| C <sub>max</sub> _norm       | $2.50 \times 10^7$    | mg/l       |
| t <sub>max</sub>             | 1.50                  | h          |
| C <sub>tEnd</sub>            | $1.18 \times 10^{-3}$ | μmol/l     |
| AUC <sub>tEnd</sub>          | 2779.89               | μmol*min/l |
| AUC <sub>tEnd</sub> _norm    | $4.17 \times 10^{14}$ | μg*min/l   |
| AUC <sub>inf</sub>           | 2821.02               | μmol*min/l |
| AUC <sub>inf</sub> _norm     | $4.23 \times 10^{14}$ | μg*min/l   |
| MRT                          | 532.48                | h          |
| Half-Life                    | 404.25                | h          |
| % AUC (t <sub>last</sub> -∞) | 0.01                  |            |
| Total body clearance/F       | $2.36 \times 10^{-3}$ | ml/min/kg  |
| V <sub>ss</sub> (plasma)/F   | 75.50                 | ml/kg      |
| V <sub>d</sub> (plasma)/F    | 82.70                 | ml/kg      |

**Table 7.11:** PK-Analyses for Beva\_wu2019\_HV\_1mpk..Human.iv perfusion.1.Bevacizumab\_human\_sim.1-Bevacizumab\_human\_sim-Measurement

**Beva\_wu2019\_HV\_1mpk..Human.iv perfusion.1.Bevacizumab\_human\_sim.2-Bevacizumab\_human\_-sim-Measurement**

| Parameter                     | Value | Unit   |
|-------------------------------|-------|--------|
| C <sub>max</sub>              | 0.12  | μmol/l |
| <i>continued on next page</i> |       |        |

| continued from previous page |                       |            |
|------------------------------|-----------------------|------------|
| Parameter                    | Value                 | Unit       |
| C <sub>max</sub> _norm       | $1.81 \times 10^7$    | mg/l       |
| t <sub>max</sub>             | 14.58                 | h          |
| C <sub>tEnd</sub>            | $2.20 \times 10^{-4}$ | μmol/l     |
| AUC <sub>tEnd</sub>          | 2257.21               | μmol*min/l |
| AUC <sub>tEnd</sub> _norm    | $3.39 \times 10^{14}$ | μg*min/l   |
| AUC <sub>inf</sub>           | NaN                   | μmol*min/l |
| AUC <sub>inf</sub> _norm     | NaN                   | μg*min/l   |
| MRT                          | NaN                   | h          |
| Half-Life                    | Infinity              | h          |
| % AUC (t <sub>last</sub> -∞) | NaN                   |            |
| Total body clearance/F       | NaN                   | ml/min/kg  |
| V <sub>ss</sub> (plasma)/F   | NaN                   | ml/kg      |
| V <sub>d</sub> (plasma)/F    | NaN                   | ml/kg      |

**Table 7.12:** PK-Analyses for Beva\_wu2019\_HV\_1mpk..Human.iv perfusion.1.Bevacizumab\_human\_sim.2-Bevacizumab\_human\_sim-Measurement

Beva\_wu2019\_HV\_1mpk..Human.iv perfusion.1.Bevacizumab\_human\_sim.3-Bevacizumab\_human\_sim-Measurement

| Parameter                    | Value                 | Unit       |
|------------------------------|-----------------------|------------|
| C <sub>max</sub>             | 0.12                  | μmol/l     |
| C <sub>max</sub> _norm       | $1.81 \times 10^7$    | mg/l       |
| t <sub>max</sub>             | 14.58                 | h          |
| C <sub>tEnd</sub>            | $2.48 \times 10^{-3}$ | μmol/l     |
| AUC <sub>tEnd</sub>          | 2995.12               | μmol*min/l |
| AUC <sub>tEnd</sub> _norm    | $4.49 \times 10^{14}$ | μg*min/l   |
| AUC <sub>inf</sub>           | NaN                   | μmol*min/l |
| AUC <sub>inf</sub> _norm     | NaN                   | μg*min/l   |
| MRT                          | NaN                   | h          |
| Half-Life                    | Infinity              | h          |
| % AUC (t <sub>last</sub> -∞) | NaN                   |            |
| Total body clearance/F       | NaN                   | ml/min/kg  |
| V <sub>ss</sub> (plasma)/F   | NaN                   | ml/kg      |
| V <sub>d</sub> (plasma)/F    | NaN                   | ml/kg      |

**Table 7.13:** PK-Analyses for Beva\_wu2019\_HV\_1mpk..Human.iv perfusion.1.Bevacizumab\_human\_sim.3-Bevacizumab\_human\_sim-Measurement

## Chapter 8

# Sim\_HV\_3mg/kg\_VEGF

### 8.1 Used building blocks

| Building Block | Name                                                |
|----------------|-----------------------------------------------------|
| Individual     | HV_sim_VEGF (see section 1.3 in Part I)             |
| Compound       | Bevacizumab_human_sim (see section 2.3 in Part I)   |
| Protocol       | Perfusion 90 min_3mg/kg (see section 3.3 in Part I) |

**Table 8.1:** Building Block

### 8.2 Simulation Properties

#### 8.2.1 Model Structure

Allow aging

No

#### Calculation methods

| Category                  | Calculation methods   |
|---------------------------|-----------------------|
| Endothelial surface areas | Organ vascularization |
| Body surface area         | Mosteller             |

**Table 8.2:** Calculation methods

#### 8.2.2 Compounds

##### 8.2.2.1 Bevacizumab\_human\_sim

#### Compound Configuration

| Parameter                                  | Alternative in compound | Value   | Unit      |
|--------------------------------------------|-------------------------|---------|-----------|
| Solubility                                 | Measurement             | 9999.00 | mg/l      |
| Lipophilicity                              | Measurement             | −5.00   | Log Units |
| Fraction unbound (plasma, reference value) | Measurement             | 1.00    |           |
| <i>continued on next page</i>              |                         |         |           |



| continued from previous page     |                         |       |        |
|----------------------------------|-------------------------|-------|--------|
| Parameter                        | Alternative in compound | Value | Unit   |
| Specific organ permeability      | Calculated              | 0     | cm/min |
| Specific intestinal permeability | Calculated              | 0     | cm/min |

Table 8.3: Compound Configuration

### Calculation methods

| Category                | Calculation methods |
|-------------------------|---------------------|
| Partition coefficients  | PK-Sim Standard     |
| Cellular permeabilities | PK-Sim Standard     |

Table 8.4: Calculation methods

## 8.2.3 Processes

### 8.2.3.1 Bevacizumab\_human\_sim

#### Specific Binding

Mapping VEGFA with VEGFA-Paper

## 8.2.4 Administration

### 8.2.4.1 Bevacizumab\_human\_sim

#### Simple protocol

Intravenous Infusion

Dosing interval: Single

Dose: 3.00 mg/kg

Infusion time: 90.00 min

## 8.3 Charts

### 8.3.1 Time Profile Analysis

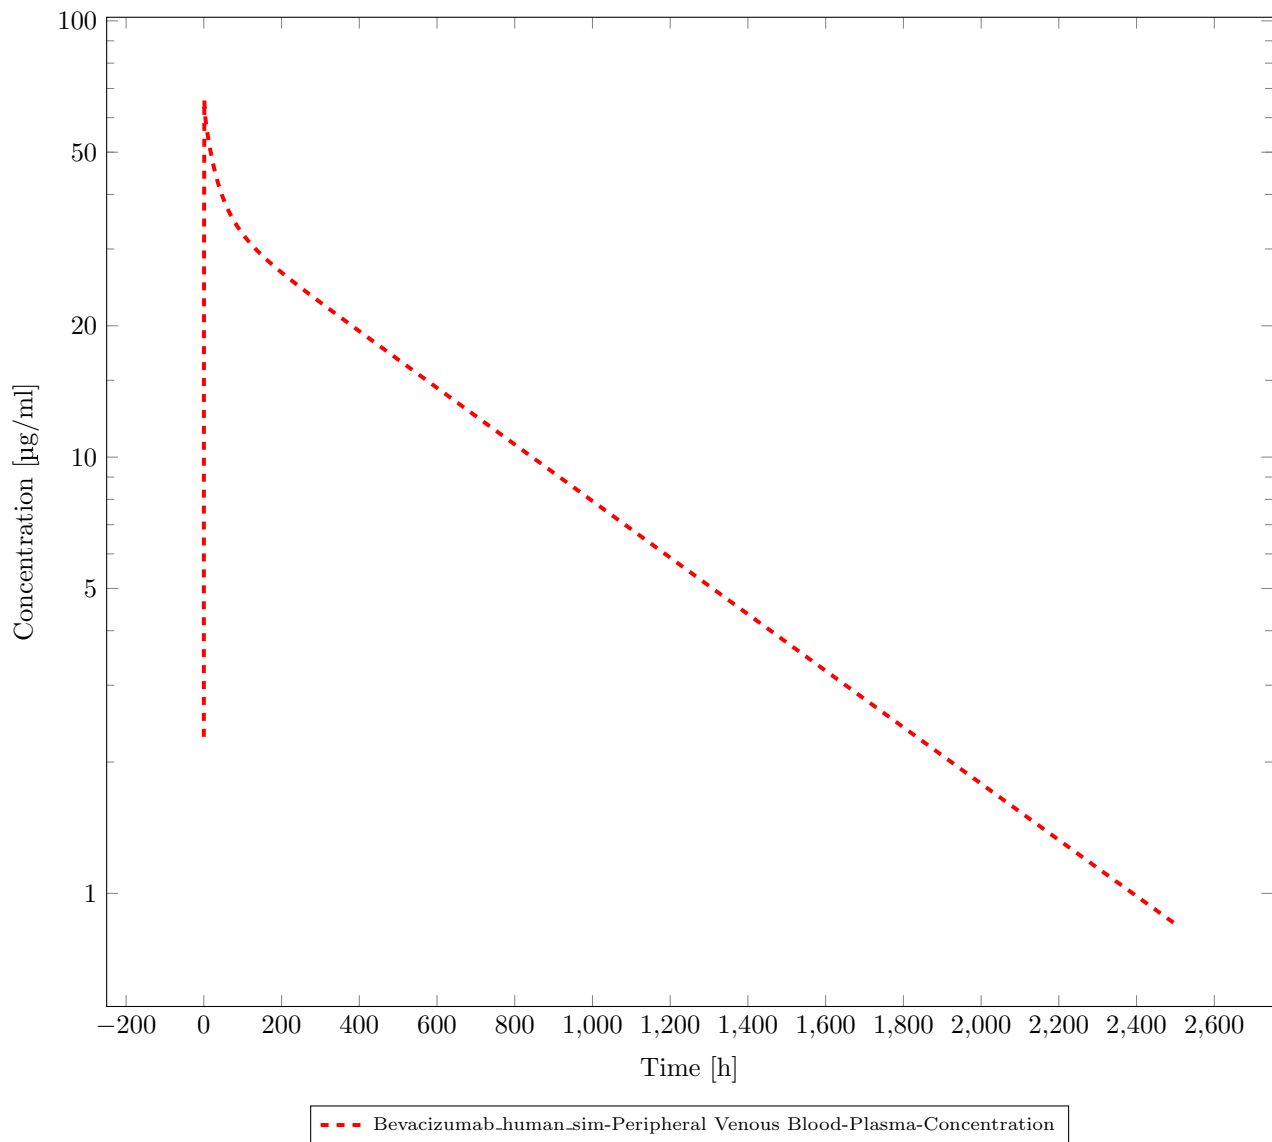

**Figure 8.1**

#### 8.3.1.1 Global PK-Analyses

| Parameter              | Compound              | Value                 | Unit      |
|------------------------|-----------------------|-----------------------|-----------|
| Vss (plasma)           | Bevacizumab_human_sim | 78.73                 | ml/kg     |
| Vd (plasma)            | Bevacizumab_human_sim | 82.77                 | ml/kg     |
| Vss (phys-chem)        | Bevacizumab_human_sim | 623.05                | ml/kg     |
| Total plasma clearance | Bevacizumab_human_sim | $2.03 \times 10^{-3}$ | ml/min/kg |

**Table 8.5:** Global PK-Analyses

#### 8.3.1.2 PK-Analyses

**Bevacizumab\_human\_sim-Peripheral Venous Blood-Plasma-Concentration**

| Parameter              | Value                 | Unit       |
|------------------------|-----------------------|------------|
| C_max                  | 0.44                  | µmol/l     |
| C_max_norm             | $2.20 \times 10^7$    | mg/l       |
| t_max                  | 1.50                  | h          |
| C_tEnd                 | $5.67 \times 10^{-3}$ | µmol/l     |
| AUC_tEnd               | 9617.67               | µmol*min/l |
| AUC_tEnd_norm          | $4.81 \times 10^{14}$ | µg*min/l   |
| AUC_inf                | 9848.75               | µmol*min/l |
| AUC_inf_norm           | $4.92 \times 10^{14}$ | µg*min/l   |
| MRT                    | 646.13                | h          |
| Half-Life              | 470.89                | h          |
| % AUC (tlast-∞)        | 0.02                  |            |
| Total body clearance/F | $2.03 \times 10^{-3}$ | ml/min/kg  |
| Vss (plasma)/F         | 78.73                 | ml/kg      |
| Vd (plasma)/F          | 82.77                 | ml/kg      |

**Table 8.6:** PK-Analyses for Bevacizumab\_human\_sim-Peripheral Venous Blood-Plasma-Concentration**Beva\_sinn2021\_HV\_3mpk..Human.iv perfusion.3.Bevacizumab\_human\_sim-Bevacizumab\_human\_sim-Measurement**

| Parameter              | Value                 | Unit       |
|------------------------|-----------------------|------------|
| C_max                  | 0.56                  | µmol/l     |
| C_max_norm             | $2.78 \times 10^7$    | mg/l       |
| t_max                  | 0.94                  | h          |
| C_tEnd                 | $6.84 \times 10^{-3}$ | µmol/l     |
| AUC_tEnd               | 13496.98              | µmol*min/l |
| AUC_tEnd_norm          | $6.75 \times 10^{14}$ | µg*min/l   |
| AUC_inf                | 13722.24              | µmol*min/l |
| AUC_inf_norm           | $6.86 \times 10^{14}$ | µg*min/l   |
| MRT                    | 569.85                | h          |
| Half-Life              | 380.52                | h          |
| % AUC (tlast-∞)        | 0.02                  |            |
| Total body clearance/F | $1.46 \times 10^{-3}$ | ml/min/kg  |
| Vss (plasma)/F         | 49.83                 | ml/kg      |
| Vd (plasma)/F          | 48.01                 | ml/kg      |

**Table 8.7:** PK-Analyses for Beva\_sinn2021\_HV\_3mpk..Human.iv perfusion.3.Bevacizumab\_human\_sim-Bevacizumab\_human\_sim-Measurement**Beva\_shin2020\_HV\_3mpk..Human.iv perfusion.3.Bevacizumab\_human\_sim.3-Bevacizumab\_human\_sim-Measurement**

| Parameter                  | Value                 | Unit       |
|----------------------------|-----------------------|------------|
| C <sub>max</sub>           | 0.39                  | μmol/l     |
| C <sub>max_norm</sub>      | $1.96 \times 10^7$    | mg/l       |
| t <sub>max</sub>           | 47.73                 | h          |
| C <sub>tEnd</sub>          | 0.02                  | μmol/l     |
| AUC <sub>tEnd</sub>        | 12330.29              | μmol*min/l |
| AUC <sub>tEnd_norm</sub>   | $6.17 \times 10^{14}$ | μg*min/l   |
| AUC <sub>inf</sub>         | NaN                   | μmol*min/l |
| AUC <sub>inf_norm</sub>    | NaN                   | μg*min/l   |
| MRT                        | NaN                   | h          |
| Half-Life                  | Infinity              | h          |
| % AUC (tlast-∞)            | NaN                   |            |
| Total body clearance/F     | NaN                   | ml/min/kg  |
| V <sub>ss</sub> (plasma)/F | NaN                   | ml/kg      |
| V <sub>d</sub> (plasma)/F  | NaN                   | ml/kg      |

**Table 8.8:** PK-Analyses for Beva\_shin2020\_HV\_3mpk..Human.iv perfusion.3.Bevacizumab\_human\_sim.3-Bevacizumab\_human\_sim-Measurement

**Beva\_shin2020\_HV\_3mpk..Human.iv perfusion.3.Bevacizumab\_human\_sim.2-Bevacizumab\_human\_sim-Measurement**

| Parameter                  | Value                 | Unit       |
|----------------------------|-----------------------|------------|
| C <sub>max</sub>           | 0.27                  | μmol/l     |
| C <sub>max_norm</sub>      | $1.37 \times 10^7$    | mg/l       |
| t <sub>max</sub>           | 47.73                 | h          |
| C <sub>tEnd</sub>          | $7.79 \times 10^{-3}$ | μmol/l     |
| AUC <sub>tEnd</sub>        | 7591.91               | μmol*min/l |
| AUC <sub>tEnd_norm</sub>   | $3.80 \times 10^{14}$ | μg*min/l   |
| AUC <sub>inf</sub>         | NaN                   | μmol*min/l |
| AUC <sub>inf_norm</sub>    | NaN                   | μg*min/l   |
| MRT                        | NaN                   | h          |
| Half-Life                  | Infinity              | h          |
| % AUC (tlast-∞)            | NaN                   |            |
| Total body clearance/F     | NaN                   | ml/min/kg  |
| V <sub>ss</sub> (plasma)/F | NaN                   | ml/kg      |
| V <sub>d</sub> (plasma)/F  | NaN                   | ml/kg      |

**Table 8.9:** PK-Analyses for Beva\_shin2020\_HV\_3mpk..Human.iv perfusion.3.Bevacizumab\_human\_sim.2-Bevacizumab\_human\_sim-Measurement

**Beva\_shin2020\_HV\_3mpk..Human.iv perfusion.3.Bevacizumab\_human\_sim.1-Bevacizumab\_human\_sim-Measurement**

| Parameter        | Value | Unit   |
|------------------|-------|--------|
| C <sub>max</sub> | 0.50  | μmol/l |

*continued on next page*

| continued from previous page |                       |            |
|------------------------------|-----------------------|------------|
| Parameter                    | Value                 | Unit       |
| C_max_norm                   | $2.51 \times 10^7$    | mg/l       |
| t_max                        | 1.50                  | h          |
| C_tEnd                       | 0.01                  | μmol/l     |
| AUC_tEnd                     | 11014.24              | μmol*min/l |
| AUC_tEnd_norm                | $5.51 \times 10^{14}$ | μg*min/l   |
| AUC_inf                      | NaN                   | μmol*min/l |
| AUC_inf_norm                 | NaN                   | μg*min/l   |
| MRT                          | NaN                   | h          |
| Half-Life                    | Infinity              | h          |
| % AUC (tlast-∞)              | NaN                   |            |
| Total body clearance/F       | NaN                   | ml/min/kg  |
| Vss (plasma)/F               | NaN                   | ml/kg      |
| Vd (plasma)/F                | NaN                   | ml/kg      |

**Table 8.10:** PK-Analyses for Beva\_shin2020\_HV\_3mpk..Human.iv perfusion.3.Bevacizumab\_human\_sim.1-Bevacizumab\_human\_sim-Measurement

## Chapter 9

# Monkey\_beva\_4mpk\_vegf

### 9.1 Used building blocks

| Building Block | Name                                                 |
|----------------|------------------------------------------------------|
| Individual     | monkey_VEGF (see section 1.4 in Part I)              |
| Compound       | bevacizumab_monkey_VEGF (see section 2.4 in Part I)  |
| Protocol       | Perfusion 60 min_4 mg/kg (see section 3.1 in Part I) |

**Table 9.1:** Building Block

### 9.2 Simulation Properties

#### 9.2.1 Model Structure

Allow aging

No

Calculation methods

| Category                  | Calculation methods   |
|---------------------------|-----------------------|
| Endothelial surface areas | Organ vascularization |

**Table 9.2:** Calculation methods

#### 9.2.2 Compounds

##### 9.2.2.1 bevacizumab\_monkey\_VEGF

Compound Configuration

| Parameter                                  | Alternative in compound | Value   | Unit      |
|--------------------------------------------|-------------------------|---------|-----------|
| Solubility                                 | Measurement             | 9999.00 | mg/l      |
| Lipophilicity                              | Measurement             | −5.00   | Log Units |
| Fraction unbound (plasma, reference value) | Measurement             | 1.00    |           |
| Specific organ permeability                | Calculated              | 0       | cm/min    |
| <i>continued on next page</i>              |                         |         |           |

| <i>continued from previous page</i> |                         |       |        |
|-------------------------------------|-------------------------|-------|--------|
| Parameter                           | Alternative in compound | Value | Unit   |
| Specific intestinal permeability    | Calculated              | 0     | cm/min |

**Table 9.3:** Compound Configuration**Calculation methods**

| Category                | Calculation methods |
|-------------------------|---------------------|
| Partition coefficients  | PK-Sim Standard     |
| Cellular permeabilities | PK-Sim Standard     |

**Table 9.4:** Calculation methods**9.2.3 Processes****9.2.3.1 bevacizumab\_monkey\_VEGF****Specific Binding**

Mapping VEGFA with VEGFA-paper

**9.2.4 Administration****9.2.4.1 bevacizumab\_monkey\_VEGF****Simple protocol**

Intravenous Infusion

Dosing interval: Single

Dose: 4.00 mg/kg

Infusion time: 60.00 min

**9.3 Charts**

### 9.3.1 Time Profile Analysis

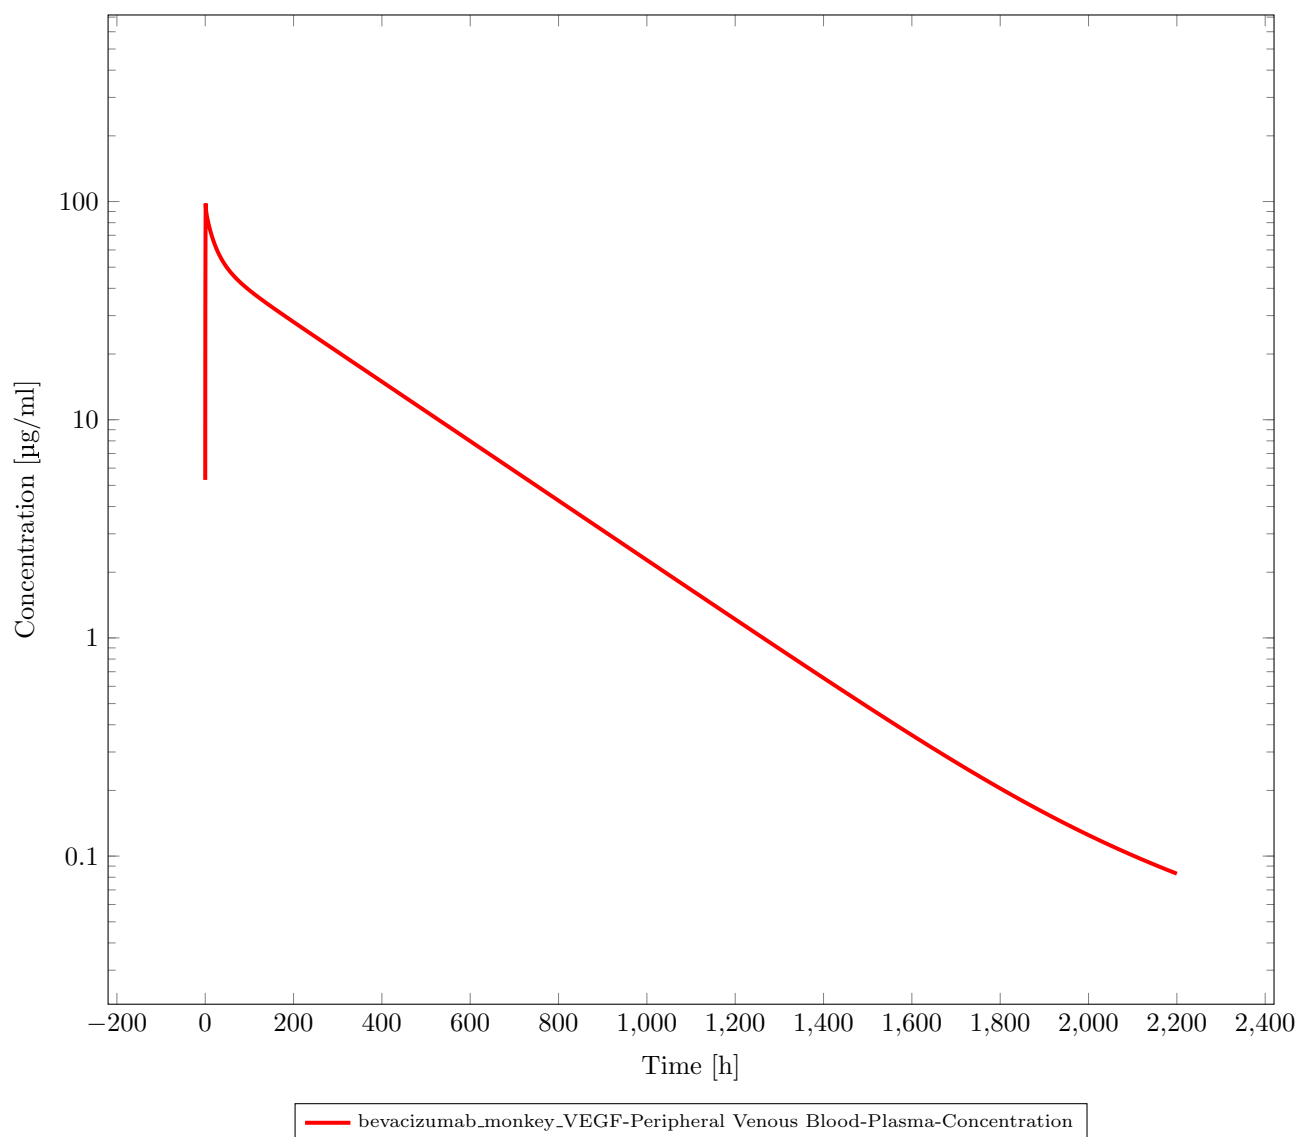

**Figure 9.1**

#### 9.3.1.1 Global PK-Analyses

| Parameter              | Compound                | Value                 | Unit      |
|------------------------|-------------------------|-----------------------|-----------|
| Vss (plasma)           | bevacizumab_monkey_VEGF | 70.05                 | ml/kg     |
| Vd (plasma)            | bevacizumab_monkey_VEGF | 124.41                | ml/kg     |
| Vss (phys-chem)        | bevacizumab_monkey_VEGF | 644.98                | ml/kg     |
| Total plasma clearance | bevacizumab_monkey_VEGF | $3.78 \times 10^{-3}$ | ml/min/kg |

**Table 9.5:** Global PK-Analyses

#### 9.3.1.2 PK-Analyses



**bevacizumab\_monkey\_VEGF-Peripheral Venous Blood-Plasma-Concentration**

| Parameter                    | Value                 | Unit       |
|------------------------------|-----------------------|------------|
| C <sub>max</sub>             | 0.65                  | μmol/l     |
| C <sub>max_norm</sub>        | $2.45 \times 10^7$    | mg/l       |
| t <sub>max</sub>             | 1.00                  | h          |
| C <sub>tEnd</sub>            | $5.54 \times 10^{-4}$ | μmol/l     |
| AUC <sub>tEnd</sub>          | 7040.74               | μmol*min/l |
| AUC <sub>tEnd_norm</sub>     | $2.64 \times 10^{14}$ | μg*min/l   |
| AUC <sub>inf</sub>           | 7058.98               | μmol*min/l |
| AUC <sub>inf_norm</sub>      | $2.65 \times 10^{14}$ | μg*min/l   |
| MRT                          | 309.05                | h          |
| Half-Life                    | 380.44                | h          |
| % AUC (t <sub>last</sub> -∞) | $2.58 \times 10^{-3}$ |            |
| Total body clearance/F       | $3.78 \times 10^{-3}$ | ml/min/kg  |
| V <sub>ss</sub> (plasma)/F   | 70.05                 | ml/kg      |
| V <sub>d</sub> (plasma)/F    | 124.41                | ml/kg      |

**Table 9.6:** PK-Analyses for bevacizumab\_monkey\_VEGF-Peripheral Venous Blood-Plasma-Concentration**Beva\_Zalevksy2010\_monkey\_4mpk..Monkey.iv perfusion.4.bevacizumab\_monkey-bevacizumab\_monkey-Measurement**

| Parameter                    | Value                 | Unit       |
|------------------------------|-----------------------|------------|
| C <sub>max</sub>             | 0.77                  | μmol/l     |
| C <sub>max_norm</sub>        | NaN                   | mg/l       |
| t <sub>max</sub>             | 1.92                  | h          |
| C <sub>tEnd</sub>            | $6.74 \times 10^{-4}$ | μmol/l     |
| AUC <sub>tEnd</sub>          | 7847.21               | μmol*min/l |
| AUC <sub>tEnd_norm</sub>     | NaN                   | μg*min/l   |
| AUC <sub>inf</sub>           | 7863.87               | μmol*min/l |
| AUC <sub>inf_norm</sub>      | NaN                   | μg*min/l   |
| MRT                          | 339.82                | h          |
| Half-Life                    | 285.61                | h          |
| % AUC (t <sub>last</sub> -∞) | $2.12 \times 10^{-3}$ |            |
| Total body clearance/F       | NaN                   | ml/min/kg  |
| V <sub>ss</sub> (plasma)/F   | NaN                   | ml/kg      |
| V <sub>d</sub> (plasma)/F    | NaN                   | ml/kg      |

**Table 9.7:** PK-Analyses for Beva\_Zalevksy2010\_monkey\_4mpk..Monkey.iv perfusion.4.bevacizumab\_monkey-bevacizumab\_monkey-Measurement

## Part III

# Simulation Comparisons

# Chapter 1

## Comparison\_Sim\_HV\_3mg/kg

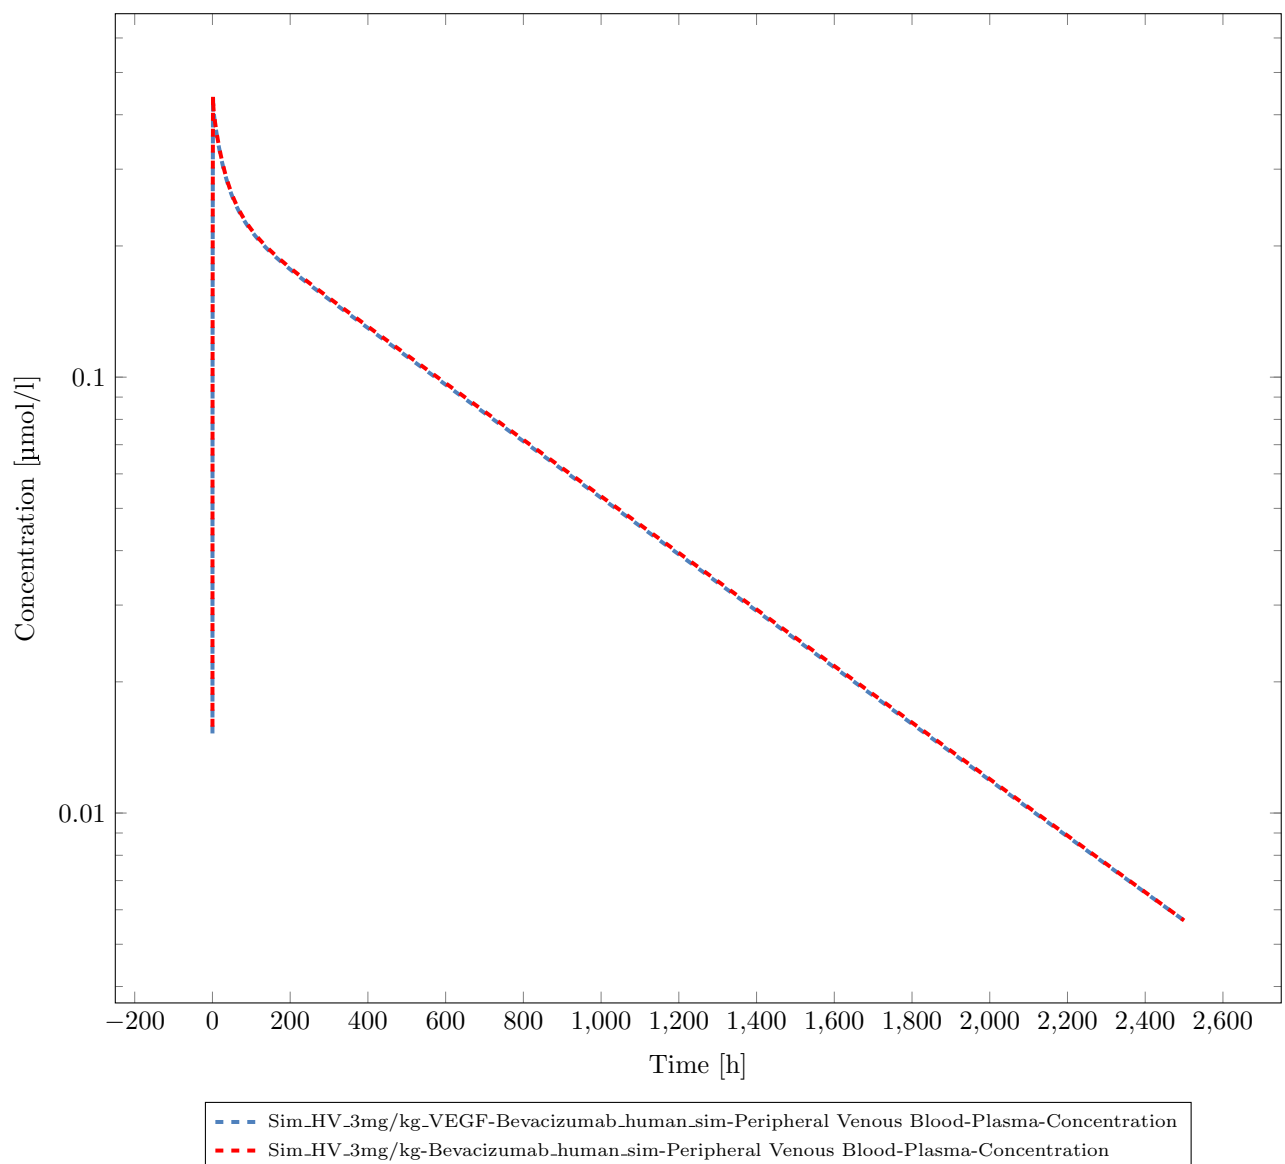

**Figure 1.1**

## Chapter 2

### Comparison\_Sim\_HV\_1mg/kg

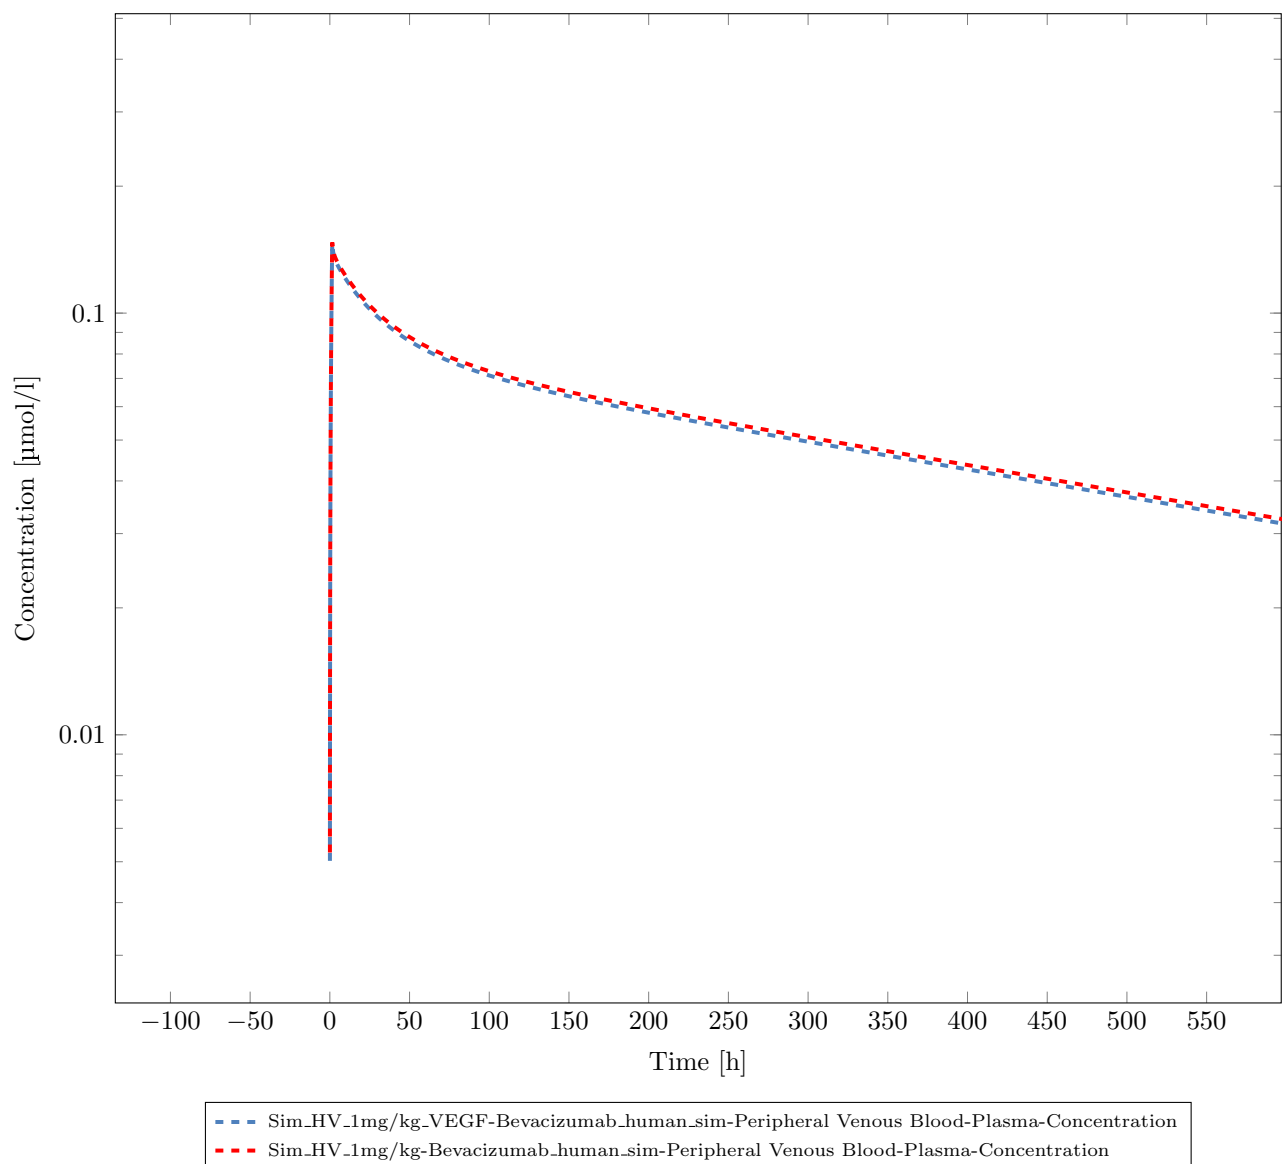

**Figure 2.1**

## Chapter 3

### Comparison\_Sim\_HV\_0.5mg/kg

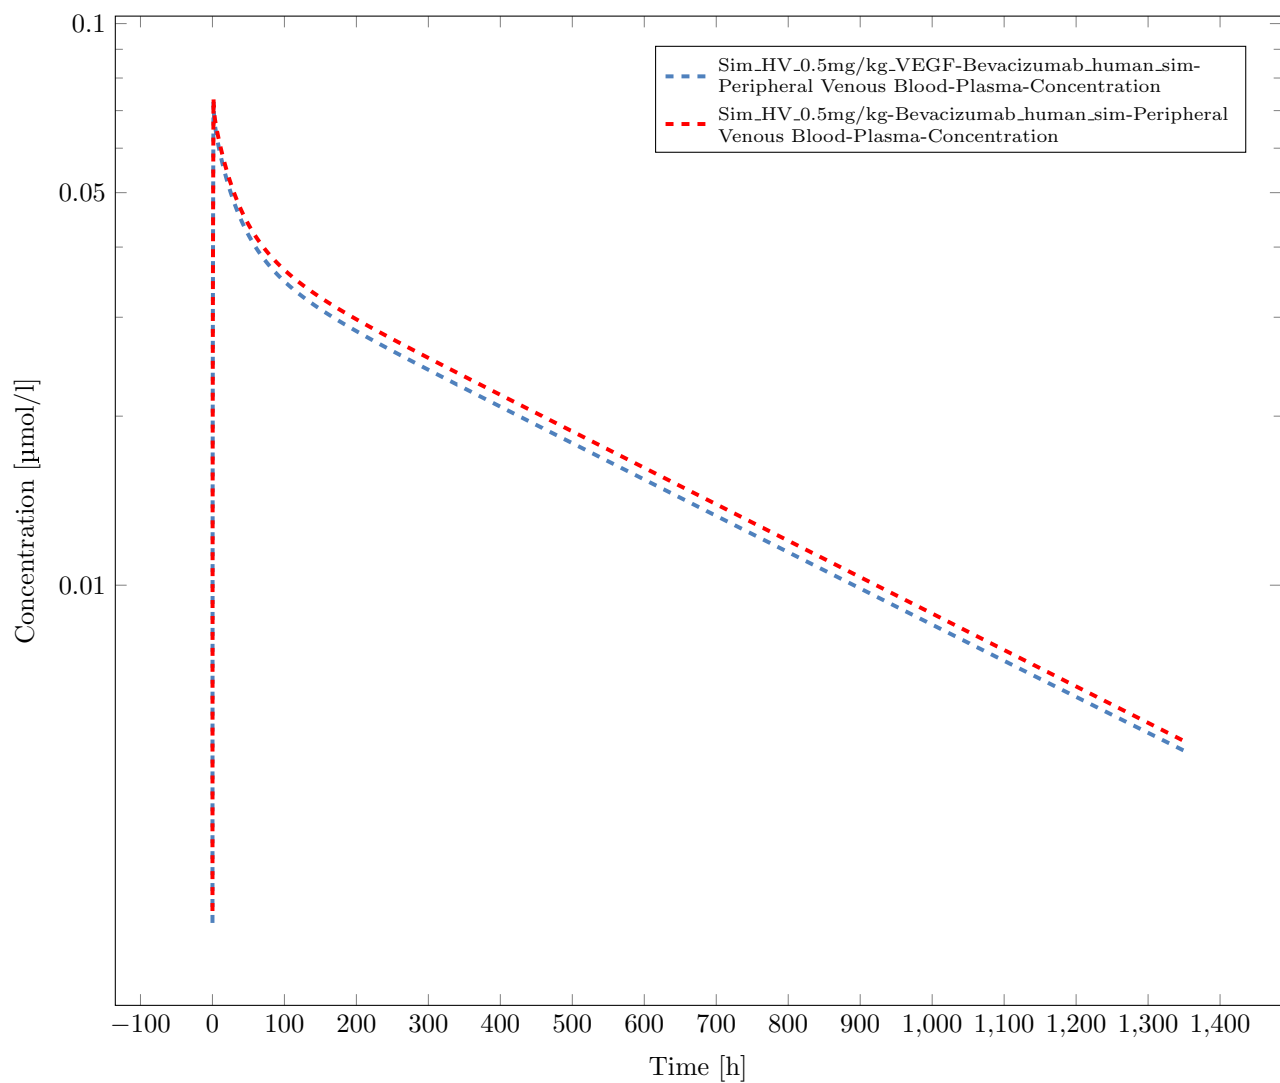

Figure 3.1

## Part IV

# Observed Data

# Chapter 1

## Beva\_Zalevksy2010\_monkey\_- 4mpk..Monkey.iv perfusion.4.bevacizumab\_monkey

Observed Data

Beva\_Zalevksy2010\_monkey\_4mpk..Monkey.iv perfusion.4.bevacizumab\_monkey

Source: J:\PhInC\Suivi\_Echanges\Stage\Salih Benamara\_2022\Gastro Plus\Bevacizumab\_all\_Raw\_Data\Donne  
propres\Beva\_Zalevksy2010\_monkey\_4mpk.csv

Sheet:

Species: Monkey

Route: iv perfusion

Dose: 4

Molecule: bevacizumab\_monkey

| Time [h] | Measurement [ $\mu\text{g/ml}$ ] |
|----------|----------------------------------|
| 1.92     | 116.08                           |
| 3.84     | 103.94                           |
| 7.68     | 85.21                            |
| 23.04    | 68.33                            |
| 42.24    | 54.79                            |
| 65.28    | 45.92                            |
| 90.24    | 41.13                            |
| 119.04   | 38.07                            |
| 147.84   | 33.35                            |
| 170.88   | 31.56                            |
| 241.92   | 25.88                            |
| 339.84   | 20.31                            |
| 410.88   | 16.11                            |
| 504.96   | 11.57                            |
| 673.92   | 7.37                             |
| 840.96   | 5.91                             |
| 1011.84  | 3.60                             |
| 1178.88  | 2.14                             |
| 1347.84  | 1.22                             |
| 1512.96  | 0.65                             |
| 1681.92  | 0.39                             |
| 1848.96  | 0.20                             |

*continued on next page*

| <i>continued from previous page</i> |                                                  |
|-------------------------------------|--------------------------------------------------|
| <b>Time [h]</b>                     | <b>Measurement [<math>\mu\text{g/ml}</math>]</b> |
| 2135.04                             | 0.10                                             |

**Table 1.1:** Beva\_Zalevksy2010\_monkey\_4mpk



## Chapter 2

# Beva-xtend\_Zalevksy2010\_monkey\_- 4mpk..Monkey.iv perfusion.4.bevacizumab\_xtend\_monkey

Observed Data

Beva-xtend\_Zalevksy2010\_monkey\_4mpk..Monkey.iv perfusion.4.bevacizumab\_xtend\_monkey

Source: J:\PhInC\Suivi\_Echanges\Stage\Salih Benamara\_2022\Gastro Plus\Bevacizumab\_all\_Raw\_Data\Donne  
propres\Beva-xtend\_Zalevksy2010\_monkey\_4mpk.csv

Sheet:

Species: Monkey

Route: iv perfusion

Dose: 4

Molecule: bevacizumab\_xtend\_monkey

| Time [h] | Measurement [ $\mu\text{g/ml}$ ] |
|----------|----------------------------------|
| 1.93     | 122.17                           |
| 15.44    | 91.49                            |
| 25.09    | 75.72                            |
| 48.26    | 62.68                            |
| 73.35    | 57.34                            |
| 98.45    | 54.84                            |
| 123.54   | 51.88                            |
| 146.70   | 49.07                            |
| 169.87   | 46.94                            |
| 241.29   | 44.89                            |
| 337.80   | 40.62                            |
| 409.22   | 36.75                            |
| 505.74   | 32.51                            |
| 675.60   | 28.45                            |
| 843.54   | 24.08                            |
| 1013.40  | 23.29                            |
| 1177.48  | 17.83                            |
| 1345.42  | 16.31                            |
| 1515.28  | 14.44                            |
| 1683.22  | 12.49                            |
| 1853.08  | 10.57                            |

*continued on next page*

| continued from previous page |                                  |
|------------------------------|----------------------------------|
| Time [h]                     | Measurement [ $\mu\text{g/ml}$ ] |
| 2142.63                      | 7.83                             |

**Table 2.1:** Beva-xtend\_Zalevksy2010\_monke

## Chapter 3

# Beva\_Demarchi2021\_HV\_- 1mpk..Human.iv perfusion.1.Bevacizumab\_human\_sim

Observed Data

Beva\_Demarchi2021\_HV\_1mpk..Human.iv perfusion.1.Bevacizumab\_human\_sim

Source: J:\PhInC\Suivi\_Echanges\Stage\Salih Benamara\_2022\Gastro Plus\Bevacizumab\_all\_Raw\_Data\Donne  
propres\Beva\_Demarchi2021\_HV\_1mpk.csv

Sheet:

Species: Human

Route: iv perfusion

Dose: 1

Molecule: Bevacizumab\_human\_sim

| Time [h] | Measurement [mg/l] |
|----------|--------------------|
| 0        | 0.06               |
| 0.75     | 12.00              |
| 4.86     | 23.00              |
| 16.21    | 22.50              |
| 25.93    | 22.00              |
| 43.75    | 19.00              |
| 58.34    | 14.69              |
| 71.30    | 13.08              |
| 95.61    | 12.19              |
| 183.12   | 8.90               |
| 358.14   | 6.06               |
| 526.67   | 5.85               |
| 696.83   | 3.23               |
| 862.12   | 2.47               |
| 1030.65  | 1.84               |
| 1199.19  | 1.41               |
| 1534.64  | 0.76               |
| 1704.79  | 0.49               |
| 1871.71  | 0.27               |
| 2278.46  | 0.01               |

**Table 3.1:** Beva\_Demarchi2021\_HV\_1mpk..Hu

## Chapter 4

# Beva\_Hetema2017\_HV\_- 1mpk..Human.iv perfusion.1.Bevacizumab\_human\_sim

Observed Data

Beva\_Hetema2017\_HV\_1mpk..Human.iv perfusion.1.Bevacizumab\_human\_sim

Source: J:\PhInC\Suivi\_Echanges\Stage\Salih Benamara\_2022\Gastro Plus\Bevacizumab\_all\_Raw\_Data\Donne  
propres\Beva\_Hetema2017\_HV\_1mpk.csv

Sheet:

Species: Human

Route: iv perfusion

Dose: 1

Molecule: Bevacizumab\_human\_sim

| Time [h] | Measurement [mg/l] |
|----------|--------------------|
| 0.64     | 24.50              |
| 1.29     | 22.93              |
| 1.93     | 21.48              |
| 2.57     | 21.06              |
| 24.44    | 18.23              |
| 46.95    | 14.39              |
| 91.32    | 11.39              |
| 169.14   | 9.88               |
| 333.78   | 7.08               |
| 502.29   | 5.12               |
| 838.00   | 2.53               |
| 1179.50  | 1.26               |

**Table 4.1:** Beva\_Hetema2017\_HV\_1mpk..Huma

## Chapter 5

# Beva\_Hummel2022\_HV\_- 1mpk..Human.iv perfusion.1.Bevacizumab\_human\_sim

Observed Data

Beva\_Hummel2022\_HV\_1mpk..Human.iv perfusion.1.Bevacizumab\_human\_sim

Source: J:\PhInC\Suivi\_Echanges\Stage\Salih Benamara\_2022\Gastro Plus\Bevacizumab\_all\_Raw\_Data\Donne  
propres\Beva\_Hummel2022\_HV\_1mpk.csv

Sheet:

Species: Human

Route: iv perfusion

Dose: 1

Molecule: Bevacizumab\_human\_sim

| Time [h] | Measurement [mg/l] |
|----------|--------------------|
| 0.33     | 5.00               |
| 1.00     | 15.00              |
| 1.50     | 25.00              |
| 2.00     | 24.90              |
| 3.00     | 24.80              |
| 4.00     | 24.60              |
| 5.00     | 24.50              |
| 6.00     | 24.40              |
| 8.00     | 24.20              |
| 20.05    | 24.07              |
| 30.74    | 20.16              |
| 41.43    | 17.65              |
| 60.14    | 15.46              |
| 81.52    | 13.73              |
| 102.90   | 12.39              |
| 134.97   | 11.25              |
| 163.04   | 10.30              |
| 204.46   | 9.50               |
| 273.95   | 8.76               |
| 350.13   | 7.61               |
| 510.49   | 5.22               |
| 672.19   | 4.00               |

*continued on next page*

| continued from previous page |                    |
|------------------------------|--------------------|
| Time [h]                     | Measurement [mg/l] |
| 1014.30                      | 2.20               |
| 1348.39                      | 1.15               |
| 1679.81                      | 0.63               |
| 2013.90                      | 0.31               |
| 2353.34                      | 0.10               |

**Table 5.1:** Beva\_Hummel2022\_HV\_1mpk..Huma

## Chapter 6

# Beva\_Wang2019\_HV\_1mpk..Human.iv perfusion.1.Bevacizumab\_human\_sim

Observed Data

Beva\_Wang2019\_HV\_1mpk..Human.iv perfusion.1.Bevacizumab\_human\_sim

Source: J:\PhInC\Suivi\_Echanges\Stage\Salih Benamara\_2022\Gastro Plus\Bevacizumab\_all\_Raw\_Data\Donne  
propres\Beva\_Wang2019\_HV\_1mpk.csv

Sheet:

Species: Human

Route: iv perfusion

Dose: 1

Molecule: Bevacizumab\_human\_sim

| Time [h] | Measurement [mg/l] |
|----------|--------------------|
| 1.00     | 8.34               |
| 1.50     | 17.00              |
| 2.50     | 16.00              |
| 3.50     | 15.50              |
| 5.18     | 15.11              |
| 9.50     | 14.50              |
| 22.02    | 13.36              |
| 45.33    | 11.15              |
| 93.25    | 9.23               |
| 165.78   | 6.96               |
| 238.31   | 6.48               |
| 334.15   | 5.40               |
| 502.52   | 3.79               |
| 669.59   | 2.76               |
| 839.26   | 2.08               |
| 1006.33  | 1.52               |
| 1343.07  | 0.81               |
| 1679.81  | 0.41               |
| 2015.26  | 0.21               |
| 2353.30  | 0.21               |

**Table 6.1:** Beva\_Wang2019\_HV\_1mpk..Human.

## Chapter 7

# Beva\_wu2019\_HV\_1mpk..Human.iv perfusion.1.Bevacizumab\_human\_sim.1

Observed Data

Beva\_wu2019\_HV\_1mpk..Human.iv perfusion.1.Bevacizumab\_human\_sim.1

Source: J:\PhInC\Suivi\_Echanges\Stage\Salih Benamara\_2022\Gastro Plus\Bevacizumab\_all\_Raw\_Data\Donne  
propres\Beva\_wu2019\_HV\_1mpk.csv

Sheet:

Species: Human

Route: iv perfusion

Dose: 1

Molecule: Bevacizumab\_human\_sim

Subject Id: 1

| Time [h] | Measurement [mg/l] |
|----------|--------------------|
| 0.75     | 12.00              |
| 1.50     | 25.00              |
| 2.50     | 24.50              |
| 3.50     | 24.00              |
| 5.50     | 22.50              |
| 9.50     | 20.00              |
| 14.58    | 18.09              |
| 19.92    | 16.04              |
| 46.98    | 13.86              |
| 94.96    | 11.28              |
| 168.77   | 8.42               |
| 237.64   | 7.40               |
| 336.02   | 6.29               |
| 503.26   | 4.86               |
| 671.74   | 3.69               |
| 840.22   | 2.62               |
| 1007.47  | 1.97               |
| 1344.42  | 1.13               |
| 1680.16  | 0.60               |
| 2015.89  | 0.31               |
| 2351.62  | 0.18               |

**Table 7.1:** Beva\_wu2019\_HV\_1mpk..Human.iv



## Chapter 8

# Beva\_wu2019\_HV\_1mpk..Human.iv perfusion.1.Bevacizumab\_human\_sim.2

Observed Data

Beva\_wu2019\_HV\_1mpk..Human.iv perfusion.1.Bevacizumab\_human\_sim.2

Source: J:\PhInC\Suivi\_Echanges\Stage\Salih Benamara\_2022\Gastro Plus\Bevacizumab\_all\_Raw\_Data\Donne  
propres\Beva\_wu2019\_HV\_1mpk.csv

Sheet:

Species: Human

Route: iv perfusion

Dose: 1

Molecule: Bevacizumab\_human\_sim

Subject Id: 2

| Time [h] | Measurement [mg/l] |
|----------|--------------------|
| 14.58    | 18.09              |
| 19.92    | 16.04              |
| 46.98    | 13.86              |
| 94.96    | 11.28              |
| 168.77   | 8.42               |
| 237.64   | 7.40               |
| 336.02   | 4.99               |
| 503.26   | 3.92               |
| 671.74   | 2.98               |
| 840.22   | 2.04               |
| 1007.47  | 1.40               |
| 1344.42  | 0.74               |
| 1680.16  | 0.30               |
| 2015.89  | 0.10               |
| 2351.62  | 0.03               |

**Table 8.1:** Beva\_wu2019\_HV\_1mpk..Human.iv

## Chapter 9

# Beva\_wu2019\_HV\_1mpk..Human.iv perfusion.1.Bevacizumab\_human\_sim.3

Observed Data

Beva\_wu2019\_HV\_1mpk..Human.iv perfusion.1.Bevacizumab\_human\_sim.3

Source: J:\PhInC\Suivi\_Echanges\Stage\Salih Benamara\_2022\Gastro Plus\Bevacizumab\_all\_Raw\_Data\Donne  
propres\Beva\_wu2019\_HV\_1mpk.csv

Sheet:

Species: Human

Route: iv perfusion

Dose: 1

Molecule: Bevacizumab\_human\_sim

Subject Id: 3

| Time [h] | Measurement [mg/l] |
|----------|--------------------|
| 14.58    | 18.09              |
| 19.92    | 16.04              |
| 46.98    | 13.86              |
| 94.96    | 11.28              |
| 168.77   | 8.42               |
| 237.64   | 7.40               |
| 336.02   | 7.66               |
| 503.26   | 5.92               |
| 671.74   | 4.35               |
| 840.22   | 3.14               |
| 1007.47  | 2.26               |
| 1344.42  | 1.35               |
| 1680.16  | 0.65               |
| 2015.89  | 0.53               |
| 2351.62  | 0.37               |

**Table 9.1:** Beva\_wu2019\_HV\_1mpk..Human.iv

## Chapter 10

# Beva\_shin2020\_HV\_3mpk..Human.iv perfusion.3.Bevacizumab\_human\_sim.1

Observed Data

Beva\_shin2020\_HV\_3mpk..Human.iv perfusion.3.Bevacizumab\_human\_sim.1

Source: J:\PhInC\Suivi\_Echanges\Stage\Salih Benamara\_2022\Gastro Plus\Bevacizumab\_all\_Raw\_Data\Donne  
propres\Beva\_shin2020\_HV\_3mpk.csv

Sheet:

Species: Human

Route: iv perfusion

Dose: 3

Molecule: Bevacizumab\_human\_sim

Subject Id: 1

| Time [h] | Measurement [mg/l] |
|----------|--------------------|
| 0.75     | 33.20              |
| 1.50     | 75.45              |
| 4.15     | 74.26              |
| 8.30     | 65.68              |
| 12.45    | 59.41              |
| 24.90    | 55.56              |
| 47.73    | 49.14              |
| 96.49    | 40.42              |
| 168.09   | 31.80              |
| 335.14   | 23.01              |
| 506.33   | 18.61              |
| 672.35   | 14.89              |
| 1006.44  | 9.21               |
| 1344.69  | 5.83               |
| 1679.83  | 3.69               |
| 2016.00  | 2.14               |

**Table 10.1:** Beva\_shin2020\_HV\_3mpk..Human.

## Chapter 11

# Beva\_shin2020\_HV\_3mpk..Human.iv perfusion.3.Bevacizumab\_human\_sim.2

Observed Data

Beva\_shin2020\_HV\_3mpk..Human.iv perfusion.3.Bevacizumab\_human\_sim.2

Source: J:\PhInC\Suivi\_Echanges\Stage\Salih Benamara\_2022\Gastro Plus\Bevacizumab\_all\_Raw\_Data\Donne  
propres\Beva\_shin2020\_HV\_3mpk.csv

Sheet:

Species: Human

Route: iv perfusion

Dose: 3

Molecule: Bevacizumab\_human\_sim

Subject Id: 2

| Time [h] | Measurement [mg/l] |
|----------|--------------------|
| 47.73    | 41.10              |
| 96.49    | 33.25              |
| 168.09   | 25.72              |
| 335.14   | 18.61              |
| 506.33   | 15.06              |
| 672.35   | 11.14              |
| 1006.44  | 6.59               |
| 1344.69  | 3.90               |
| 1679.83  | 2.11               |
| 2016.00  | 1.17               |

**Table 11.1:** Beva\_shin2020\_HV\_3mpk..Human.

## Chapter 12

# Beva\_shin2020\_HV\_3mpk..Human.iv perfusion.3.Bevacizumab\_human\_sim.3

Observed Data

Beva\_shin2020\_HV\_3mpk..Human.iv perfusion.3.Bevacizumab\_human\_sim.3

Source: J:\PhInC\Suivi\_Echanges\Stage\Salih Benamara\_2022\Gastro Plus\Bevacizumab\_all\_Raw\_Data\Donne  
propres\Beva\_shin2020\_HV\_3mpk.csv

Sheet:

Species: Human

Route: iv perfusion

Dose: 3

Molecule: Bevacizumab\_human\_sim

Subject Id: 3

| Time [h] | Measurement [mg/l] |
|----------|--------------------|
| 47.73    | 58.75              |
| 96.49    | 45.96              |
| 168.09   | 37.59              |
| 335.14   | 27.20              |
| 506.33   | 22.50              |
| 672.35   | 18.61              |
| 1006.44  | 12.32              |
| 1344.69  | 7.79               |
| 1679.83  | 5.33               |
| 2016.00  | 3.21               |

**Table 12.1:** Beva\_shin2020\_HV\_3mpk..Human.

## Chapter 13

# Beva\_sinn2021\_HV\_3mpk..Human.iv perfusion.3.Bevacizumab\_human\_sim

Observed Data

Beva\_sinn2021\_HV\_3mpk..Human.iv perfusion.3.Bevacizumab\_human\_sim

Source: J:\PhInC\Suivi\_Echanges\Stage\Salih Benamara\_2022\Gastro Plus\Bevacizumab\_all\_Raw\_Data\Donne  
propres\Beva\_sinn2021\_HV\_3mpk.csv

Sheet:

Species: Human

Route: iv perfusion

Dose: 3

Molecule: Bevacizumab\_human\_sim

| Time [h]               | Measurement [mg/l] |
|------------------------|--------------------|
| 0.94                   | 83.47              |
| 2.00                   | 83.00              |
| 3.00                   | 82.50              |
| 4.00                   | 82.00              |
| 5.00                   | 81.00              |
| 6.00                   | 80.50              |
| 8.00                   | 76.00              |
| 19.75                  | 73.15              |
| 36.67                  | 64.10              |
| 52.65                  | 57.75              |
| 78.04                  | 51.32              |
| 106.25                 | 49.56              |
| 132.57                 | 46.24              |
| 159.84                 | 43.43              |
| 184.29                 | 41.08              |
| 222.84                 | 38.06              |
| 301.82                 | 33.59              |
| 473.88                 | 24.06              |
| 639.37                 | 17.84              |
| 984.44                 | 10.60              |
| 1307.88                | 6.38               |
| 1840.06                | 2.70               |
| 2370.36                | 1.03               |
| continued on next page |                    |

| continued from previous page |                    |
|------------------------------|--------------------|
| Time [h]                     | Measurement [mg/l] |

**Table 13.1:** Beva\_sinn2021\_HV\_3mpk..Human.

## Chapter 14

# Beva\_li2017\_HV\_0.5mpk..Human.iv perfusion.0.5.Bevacizumab\_human\_ sim.1

Observed Data

Beva\_li2017\_HV\_0.5mpk..Human.iv perfusion.0.5.Bevacizumab\_human\_sim.1

Source: J:\PhInC\Suivi\_Echanges\Stage\Salih Benamara\_2022\Gastro Plus\Bevacizumab\_all\_Raw\_Data\Donne  
propres\Beva\_li2017\_HV\_0.5mpk.csv

Sheet:

Species: Human

Route: iv perfusion

Dose: 0.5

Molecule: Bevacizumab\_human\_sim

Subject Id: 1

| Time [h] | Measurement [mg/l] |
|----------|--------------------|
| 2.00     | 6.74               |
| 6.00     | 6.50               |
| 16.73    | 6.30               |
| 24.00    | 6.00               |
| 39.03    | 4.70               |
| 64.13    | 4.55               |
| 114.31   | 3.64               |
| 161.71   | 3.40               |
| 329.00   | 2.45               |
| 663.57   | 1.32               |
| 833.64   | 0.86               |
| 1000.93  | 0.50               |
| 1168.22  | 0.25               |
| 1335.50  | 0.15               |

**Table 14.1:** Beva\_li2017\_HV\_0.5mpk..Human.



## Chapter 15

# Beva\_li2017\_HV\_0.5mpk..Human.iv perfusion.0.5.Bevacizumab\_human\_ sim.2

Observed Data

Beva\_li2017\_HV\_0.5mpk..Human.iv perfusion.0.5.Bevacizumab\_human\_sim.2

Source: J:\PhInC\Suivi\_Echanges\Stage\Salih Benamara\_2022\Gastro Plus\Bevacizumab\_all\_Raw\_Data\Donne  
propres\Beva\_li2017\_HV\_0.5mpk.csv

Sheet:

Species: Human

Route: iv perfusion

Dose: 0.5

Molecule: Bevacizumab\_human\_sim

Subject Id: 2

| Time [h] | Measurement [mg/l] |
|----------|--------------------|
| 2.00     | 5.58               |
| 8.38     | 4.62               |
| 12.00    | 4.70               |
| 24.00    | 4.50               |
| 39.11    | 3.58               |
| 64.25    | 3.28               |
| 111.73   | 3.01               |
| 162.01   | 2.10               |
| 326.82   | 1.37               |
| 662.01   | 0.64               |
| 829.61   | 0.45               |
| 1000.00  | 0.23               |
| 1170.39  | 0.10               |
| 1337.99  | 0.08               |

**Table 15.1:** Beva\_li2017\_HV\_0.5mpk..Human.

## Chapter 16

# Beva\_li2017\_HV\_0.5mpk..Human.iv perfusion.0.5.Bevacizumab\_human\_sim.3

Observed Data

Beva\_li2017\_HV\_0.5mpk..Human.iv perfusion.0.5.Bevacizumab\_human\_sim.3

Source: J:\PhInC\Suivi\_Echanges\Stage\Salih Benamara\_2022\Gastro Plus\Bevacizumab\_all\_Raw\_Data\Donne  
propres\Beva\_li2017\_HV\_0.5mpk.csv

Sheet:

Species: Human

Route: iv perfusion

Dose: 0.5

Molecule: Bevacizumab\_human\_sim

Subject Id: 3

| Time [h] | Measurement [mg/l] |
|----------|--------------------|
| 2.00     | 8.14               |
| 5.50     | 7.52               |
| 19.27    | 6.40               |
| 24.00    | 6.30               |
| 41.28    | 6.19               |
| 66.06    | 5.21               |
| 112.84   | 4.92               |
| 162.39   | 4.01               |
| 330.28   | 3.26               |
| 663.30   | 1.35               |
| 833.94   | 0.90               |
| 999.08   | 0.51               |
| 1166.97  | 0.21               |
| 1337.61  | 0.11               |

**Table 16.1:** Beva\_li2017\_HV\_0.5mpk..Human.

## Chapter 17

# Beva\_li2017\_HV\_0.5mpk..Human.iv perfusion.0.5.Bevacizumab\_human\_ sim.4

Observed Data

Beva\_li2017\_HV\_0.5mpk..Human.iv perfusion.0.5.Bevacizumab\_human\_sim.4

Source: J:\PhInC\Suivi\_Echanges\Stage\Salih Benamara\_2022\Gastro Plus\Bevacizumab\_all\_Raw\_Data\Donne  
propres\Beva\_li2017\_HV\_0.5mpk.csv

Sheet:

Species: Human

Route: iv perfusion

Dose: 0.5

Molecule: Bevacizumab\_human\_sim

Subject Id: 4

| Time [h] | Measurement [mg/l] |
|----------|--------------------|
| 2.00     | 7.52               |
| 5.51     | 6.26               |
| 13.79    | 6.05               |
| 24.00    | 6.00               |
| 41.36    | 4.76               |
| 66.18    | 4.55               |
| 113.05   | 4.01               |
| 162.68   | 3.42               |
| 330.88   | 2.51               |
| 664.52   | 1.18               |
| 835.48   | 0.88               |
| 1000.92  | 0.71               |
| 1169.12  | 0.36               |
| 1337.32  | 0.18               |

**Table 17.1:** Beva\_li2017\_HV\_0.5mpk..Human.

## Chapter 18

# Beva\_li2017\_HV\_0.5mpk..Human.iv perfusion.0.5.Bevacizumab\_human\_ sim.5

Observed Data

Beva\_li2017\_HV\_0.5mpk..Human.iv perfusion.0.5.Bevacizumab\_human\_sim.5

Source: J:\PhInC\Suivi\_Echanges\Stage\Salih Benamara\_2022\Gastro Plus\Bevacizumab\_all\_Raw\_Data\Donne  
propres\Beva\_li2017\_HV\_0.5mpk.csv

Sheet:

Species: Human

Route: iv perfusion

Dose: 0.5

Molecule: Bevacizumab\_human\_sim

Subject Id: 5

| Time [h] | Measurement [mg/l] |
|----------|--------------------|
| 2.00     | 6.85               |
| 2.75     | 5.70               |
| 19.27    | 5.32               |
| 24.00    | 5.20               |
| 41.28    | 4.74               |
| 66.06    | 3.95               |
| 115.60   | 3.40               |
| 165.14   | 3.03               |
| 330.28   | 1.89               |
| 663.30   | 0.98               |
| 833.94   | 0.71               |
| 1001.83  | 0.59               |
| 1169.72  | 0.36               |
| 1334.86  | 0.16               |

**Table 18.1:** Beva\_li2017\_HV\_0.5mpk..Human.
