# Supplementary material for: Translation of Monoclonal Antibodies Pharmacokinetics from Animal to Human Using Physiologically Based Modeling in Open Systems Pharmacology (OSP) Suite: A Retrospective Analysis of Bevacizumab
Source: MDPI journal article supplement (doi:10.3390/pharmaceutics15082129), 2023-08-14
Supplement: s1 [file s1]

Project  
Fit-HV\_manuscrit

bpasquiers

August 3, 2023

# Contents

|          |                                                      |           |
|----------|------------------------------------------------------|-----------|
| <b>I</b> | <b>Building Blocks</b>                               | <b>6</b>  |
| <b>1</b> | <b>Individuals</b>                                   | <b>7</b>  |
| 1.1      | HV1 . . . . .                                        | 7         |
| 1.1.1    | Biometrics . . . . .                                 | 7         |
| 1.1.2    | Anatomy & Physiology . . . . .                       | 8         |
| 1.1.3    | Expression . . . . .                                 | 8         |
| 1.1.3.1  | Metabolizing Enzymes . . . . .                       | 8         |
| 1.1.3.2  | Transport Proteins . . . . .                         | 8         |
| 1.1.3.3  | Protein Binding Partners . . . . .                   | 8         |
| 1.2      | HV_chinese . . . . .                                 | 8         |
| 1.2.1    | Biometrics . . . . .                                 | 8         |
| 1.2.2    | Anatomy & Physiology . . . . .                       | 9         |
| 1.2.3    | Expression . . . . .                                 | 9         |
| 1.2.3.1  | Metabolizing Enzymes . . . . .                       | 9         |
| 1.2.3.2  | Transport Proteins . . . . .                         | 9         |
| 1.2.3.3  | Protein Binding Partners . . . . .                   | 9         |
| 1.3      | Patient1 . . . . .                                   | 9         |
| 1.3.1    | Biometrics . . . . .                                 | 9         |
| 1.3.2    | Anatomy & Physiology . . . . .                       | 10        |
| 1.3.3    | Expression . . . . .                                 | 10        |
| 1.3.3.1  | Metabolizing Enzymes . . . . .                       | 10        |
| 1.3.3.2  | Transport Proteins . . . . .                         | 10        |
| 1.3.3.3  | Protein Binding Partners . . . . .                   | 10        |
| 1.4      | Patient_ped . . . . .                                | 11        |
| 1.4.1    | Biometrics . . . . .                                 | 11        |
| 1.4.2    | Anatomy & Physiology . . . . .                       | 11        |
| 1.4.3    | Expression . . . . .                                 | 11        |
| 1.4.3.1  | Metabolizing Enzymes . . . . .                       | 11        |
| 1.4.3.2  | Transport Proteins . . . . .                         | 11        |
| 1.4.3.3  | Protein Binding Partners . . . . .                   | 11        |
| <b>2</b> | <b>Compounds</b>                                     | <b>13</b> |
| 2.1      | Bevacizumab_human . . . . .                          | 13        |
| 2.1.1    | Basic Physico-chemistry . . . . .                    | 13        |
| 2.1.1.1  | Molecular weight . . . . .                           | 13        |
| 2.1.1.2  | Lipophilicity . . . . .                              | 13        |
| 2.1.1.3  | Fraction unbound (plasma, reference value) . . . . . | 13        |
| 2.1.1.4  | Solubility . . . . .                                 | 14        |
| 2.1.2    | ADME . . . . .                                       | 14        |
| 2.1.2.1  | Absorption . . . . .                                 | 14        |
| 2.1.2.2  | Distribution . . . . .                               | 14        |
| 2.2      | Bevacizumab . . . . .                                | 15        |
| 2.2.1    | Basic Physico-chemistry . . . . .                    | 15        |
| 2.2.1.1  | Molecular weight . . . . .                           | 15        |
| 2.2.1.2  | Lipophilicity . . . . .                              | 15        |
| 2.2.1.3  | Fraction unbound (plasma, reference value) . . . . . | 15        |
| 2.2.1.4  | Solubility . . . . .                                 | 16        |

|           |                             |           |
|-----------|-----------------------------|-----------|
| 2.2.2     | ADME                        | 16        |
| 2.2.2.1   | Absorption                  | 16        |
| 2.2.2.2   | Distribution                | 16        |
| <b>3</b>  | <b>Protocols</b>            | <b>18</b> |
| 3.1       | Perfusion 90 min_1mg/kg     | 18        |
| 3.2       | Perfusion 90 min_3mg/kg     | 18        |
| 3.3       | Perfusion 90 min_0.5mg/kg   | 19        |
| 3.4       | Infusion 0.3mg/kg human     | 19        |
| 3.5       | Infusion 10mg/kg human      | 20        |
| 3.6       | Infusion 1mg/kg human       | 21        |
| 3.7       | Infusion 3mg/kg human       | 22        |
| 3.8       | 5mpk_every2weeks            | 24        |
| 3.9       | Infusion_5mg/kg             | 24        |
| 3.10      | Infusion_15mg/kg            | 24        |
| <b>II</b> | <b>Simulations</b>          | <b>25</b> |
| <b>1</b>  | <b>HV_1mg/kg</b>            | <b>26</b> |
| 1.1       | Used building blocks        | 26        |
| 1.2       | Simulation Properties       | 26        |
| 1.2.1     | Model Structure             | 26        |
| 1.2.2     | Compounds                   | 26        |
| 1.2.2.1   | Bevacizumab                 | 26        |
| 1.2.3     | Processes                   | 27        |
| 1.2.3.1   | Bevacizumab                 | 27        |
| 1.2.4     | Administration              | 27        |
| 1.2.4.1   | Bevacizumab                 | 27        |
| 1.3       | Charts                      | 27        |
| 1.3.1     | Time Profile Analysis       | 28        |
| 1.3.1.1   | Global PK-Analyses          | 28        |
| 1.3.1.2   | PK-Analyses                 | 28        |
| <b>2</b>  | <b>HV_3mg/kg</b>            | <b>33</b> |
| 2.1       | Used building blocks        | 33        |
| 2.2       | Simulation Properties       | 33        |
| 2.2.1     | Model Structure             | 33        |
| 2.2.2     | Compounds                   | 33        |
| 2.2.2.1   | Bevacizumab                 | 33        |
| 2.2.3     | Processes                   | 34        |
| 2.2.3.1   | Bevacizumab                 | 34        |
| 2.2.4     | Administration              | 34        |
| 2.2.4.1   | Bevacizumab                 | 34        |
| 2.3       | Charts                      | 34        |
| 2.3.1     | Time Profile Analysis       | 35        |
| 2.3.1.1   | Global PK-Analyses          | 35        |
| 2.3.1.2   | PK-Analyses                 | 35        |
| <b>3</b>  | <b>HV_0.5 mg/kg_chinese</b> | <b>39</b> |
| 3.1       | Used building blocks        | 39        |
| 3.2       | Simulation Properties       | 39        |
| 3.2.1     | Model Structure             | 39        |
| 3.2.2     | Compounds                   | 39        |
| 3.2.2.1   | Bevacizumab                 | 39        |
| 3.2.3     | Processes                   | 40        |
| 3.2.3.1   | Bevacizumab                 | 40        |
| 3.2.4     | Administration              | 40        |
| 3.2.4.1   | Bevacizumab                 | 40        |

|          |                                 |           |
|----------|---------------------------------|-----------|
| 3.3      | Charts . . . . .                | 40        |
| 3.3.1    | Time Profile Analysis . . . . . | 41        |
| 3.3.1.1  | Global PK-Analyses . . . . .    | 41        |
| 3.3.1.2  | PK-Analyses . . . . .           | 41        |
| <b>4</b> | <b>Sim_Patient_1mg/kg</b>       | <b>45</b> |
| 4.1      | Used building blocks . . . . .  | 45        |
| 4.2      | Simulation Properties . . . . . | 45        |
| 4.2.1    | Model Structure . . . . .       | 45        |
| 4.2.2    | Compounds . . . . .             | 45        |
| 4.2.2.1  | Bevacizumab . . . . .           | 45        |
| 4.2.3    | Processes . . . . .             | 46        |
| 4.2.3.1  | Bevacizumab . . . . .           | 46        |
| 4.2.4    | Administration . . . . .        | 46        |
| 4.2.4.1  | Bevacizumab . . . . .           | 46        |
| 4.3      | Charts . . . . .                | 47        |
| 4.3.1    | Time Profile Analysis . . . . . | 47        |
| 4.3.1.1  | PK-Analyses . . . . .           | 47        |
| <b>5</b> | <b>Sim_Patient_3mg/kg</b>       | <b>49</b> |
| 5.1      | Used building blocks . . . . .  | 49        |
| 5.2      | Simulation Properties . . . . . | 49        |
| 5.2.1    | Model Structure . . . . .       | 49        |
| 5.2.2    | Compounds . . . . .             | 49        |
| 5.2.2.1  | Bevacizumab . . . . .           | 49        |
| 5.2.3    | Processes . . . . .             | 50        |
| 5.2.3.1  | Bevacizumab . . . . .           | 50        |
| 5.2.4    | Administration . . . . .        | 50        |
| 5.2.4.1  | Bevacizumab . . . . .           | 50        |
| 5.3      | Charts . . . . .                | 51        |
| 5.3.1    | Time Profile Analysis . . . . . | 51        |
| 5.3.1.1  | PK-Analyses . . . . .           | 51        |
| <b>6</b> | <b>Sim_Patient_10mg/kg</b>      | <b>53</b> |
| 6.1      | Used building blocks . . . . .  | 53        |
| 6.2      | Simulation Properties . . . . . | 53        |
| 6.2.1    | Model Structure . . . . .       | 53        |
| 6.2.2    | Compounds . . . . .             | 53        |
| 6.2.2.1  | Bevacizumab . . . . .           | 53        |
| 6.2.3    | Processes . . . . .             | 54        |
| 6.2.3.1  | Bevacizumab . . . . .           | 54        |
| 6.2.4    | Administration . . . . .        | 54        |
| 6.2.4.1  | Bevacizumab . . . . .           | 54        |
| 6.3      | Charts . . . . .                | 55        |
| 6.3.1    | Time Profile Analysis . . . . . | 55        |
| 6.3.1.1  | PK-Analyses . . . . .           | 55        |
| <b>7</b> | <b>Sim_Patient_5mg/kg</b>       | <b>57</b> |
| 7.1      | Used building blocks . . . . .  | 57        |
| 7.2      | Simulation Properties . . . . . | 57        |
| 7.2.1    | Model Structure . . . . .       | 57        |
| 7.2.2    | Compounds . . . . .             | 57        |
| 7.2.2.1  | Bevacizumab . . . . .           | 57        |
| 7.2.3    | Processes . . . . .             | 58        |
| 7.2.3.1  | Bevacizumab . . . . .           | 58        |
| 7.2.4    | Administration . . . . .        | 58        |
| 7.2.4.1  | Bevacizumab . . . . .           | 58        |
| 7.3      | Charts . . . . .                | 58        |
| 7.3.1    | Time Profile Analysis . . . . . | 59        |

|            |                                                                              |           |
|------------|------------------------------------------------------------------------------|-----------|
| 7.3.1.1    | PK-Analyses                                                                  | 59        |
| <b>8</b>   | <b>Sim_Patient_0.3mg/kg</b>                                                  | <b>61</b> |
| 8.1        | Used building blocks                                                         | 61        |
| 8.2        | Simulation Properties                                                        | 61        |
| 8.2.1      | Model Structure                                                              | 61        |
| 8.2.2      | Compounds                                                                    | 61        |
| 8.2.2.1    | Bevacizumab                                                                  | 61        |
| 8.2.3      | Processes                                                                    | 62        |
| 8.2.3.1    | Bevacizumab                                                                  | 62        |
| 8.2.4      | Administration                                                               | 62        |
| 8.2.4.1    | Bevacizumab                                                                  | 62        |
| 8.3        | Charts                                                                       | 63        |
| 8.3.1      | Time Profile Analysis                                                        | 63        |
| 8.3.1.1    | PK-Analyses                                                                  | 63        |
| <b>9</b>   | <b>Sim_patient_ped.5mg/kg</b>                                                | <b>65</b> |
| 9.1        | Used building blocks                                                         | 65        |
| 9.2        | Simulation Properties                                                        | 65        |
| 9.2.1      | Model Structure                                                              | 65        |
| 9.2.2      | Compounds                                                                    | 65        |
| 9.2.2.1    | Bevacizumab                                                                  | 65        |
| 9.2.3      | Processes                                                                    | 66        |
| 9.2.3.1    | Bevacizumab                                                                  | 66        |
| 9.2.4      | Administration                                                               | 66        |
| 9.2.4.1    | Bevacizumab                                                                  | 66        |
| 9.3        | Charts                                                                       | 66        |
| 9.3.1      | Time Profile Analysis                                                        | 67        |
| 9.3.1.1    | Global PK-Analyses                                                           | 67        |
| 9.3.1.2    | PK-Analyses                                                                  | 67        |
| <b>10</b>  | <b>Sim_patient_ped.15mg/kg</b>                                               | <b>69</b> |
| 10.1       | Used building blocks                                                         | 69        |
| 10.2       | Simulation Properties                                                        | 69        |
| 10.2.1     | Model Structure                                                              | 69        |
| 10.2.2     | Compounds                                                                    | 69        |
| 10.2.2.1   | Bevacizumab                                                                  | 69        |
| 10.2.3     | Processes                                                                    | 70        |
| 10.2.3.1   | Bevacizumab                                                                  | 70        |
| 10.2.4     | Administration                                                               | 70        |
| 10.2.4.1   | Bevacizumab                                                                  | 70        |
| 10.3       | Charts                                                                       | 70        |
| 10.3.1     | Time Profile Analysis                                                        | 71        |
| 10.3.1.1   | Global PK-Analyses                                                           | 71        |
| 10.3.1.2   | PK-Analyses                                                                  | 71        |
| <b>III</b> | <b>Observed Data</b>                                                         | <b>73</b> |
| <b>1</b>   | <b>Beva_Demarchi2021_HV_1mpk..Human.iv perfusion.1.Bevacizumab_human_sim</b> | <b>74</b> |
| <b>2</b>   | <b>Beva_Hetema2017_HV_1mpk..Human.iv perfusion.1.Bevacizumab_human_sim</b>   | <b>75</b> |
| <b>3</b>   | <b>Beva_Hummel2022_HV_1mpk..Human.iv perfusion.1.Bevacizumab_human_sim</b>   | <b>76</b> |
| <b>4</b>   | <b>Beva_wu2019_HV_1mpk..Human.iv perfusion.1.Bevacizumab_human_sim.1</b>     | <b>78</b> |
| <b>5</b>   | <b>Beva_wu2019_HV_1mpk..Human.iv perfusion.1.Bevacizumab_human_sim.2</b>     | <b>79</b> |
| <b>6</b>   | <b>Beva_wu2019_HV_1mpk..Human.iv perfusion.1.Bevacizumab_human_sim.3</b>     | <b>80</b> |

|    |                                                                       |    |
|----|-----------------------------------------------------------------------|----|
| 7  | Beva_shin2020_HV_3mpk..Human.iv perfusion.3.Bevacizumab_human_sim.1   | 81 |
| 8  | Beva_shin2020_HV_3mpk..Human.iv perfusion.3.Bevacizumab_human_sim.2   | 82 |
| 9  | Beva_shin2020_HV_3mpk..Human.iv perfusion.3.Bevacizumab_human_sim.3   | 83 |
| 10 | Beva_sinn2021_HV_3mpk..Human.iv perfusion.3.Bevacizumab_human_sim     | 84 |
| 11 | Beva_li2017_HV_0.5mpk..Human.iv perfusion.0.5.Bevacizumab_human_sim.1 | 86 |
| 12 | Beva_li2017_HV_0.5mpk..Human.iv perfusion.0.5.Bevacizumab_human_sim.2 | 87 |
| 13 | Beva_li2017_HV_0.5mpk..Human.iv perfusion.0.5.Bevacizumab_human_sim.3 | 88 |
| 14 | Beva_li2017_HV_0.5mpk..Human.iv perfusion.0.5.Bevacizumab_human_sim.4 | 89 |
| 15 | Beva_li2017_HV_0.5mpk..Human.iv perfusion.0.5.Bevacizumab_human_sim.5 | 90 |
| 16 | Beva_Gordon2001_patients_3mpk..Human.iv perfusion.3.Bevacizumab       | 91 |
| 17 | Beva_Gordon2001_patients_0.3mpk..Human.iv perfusion.0.3.Bevacizumab   | 92 |
| 18 | Beva_Gordon2001_patients_1mpk..Human.iv perfusion.1.Bevacizumab       | 93 |
| 19 | Beva_Gordon2001_patients_10mpk..Human.iv perfusion.10.Bevacizumab     | 94 |
| 20 | Beva_Romera2018_patients_5mpk..Human.iv perfusion.5.Bevacizumab       | 95 |

## Part I

# Building Blocks

# Chapter 1

## Individuals

### 1.1 HV1

#### 1.1.1 Biometrics

##### Population Properties

| Population Properties | Value                 |
|-----------------------|-----------------------|
| Species               | Human                 |
| Population            | European (ICRP, 2002) |
| Gender                | Male                  |

**Table 1.1:** Population Properties

##### Individual Parameters

| Individual Parameters | Value  | Unit              |
|-----------------------|--------|-------------------|
| Age                   | 30.00  | year(s)           |
| Weight                | 73.00  | kg                |
| Height                | 176.00 | cm                |
| BMI                   | 23.57  | kg/m <sup>2</sup> |

**Table 1.2:** Individual Parameters

##### Calculation methods

| Category                  | Calculation methods   |
|---------------------------|-----------------------|
| Endothelial surface areas | Organ vascularization |
| Body surface area         | Mosteller             |

**Table 1.3:** Calculation methods



## 1.1.2 Anatomy & Physiology

Default

## 1.1.3 Expression

### 1.1.3.1 Metabolizing Enzymes

None

### 1.1.3.2 Transport Proteins

None

### 1.1.3.3 Protein Binding Partners

VEGFA

Reference concentration: 3.00E-4  $\mu\text{mol/l}$

t1/2 (liver): 36.00 h

t1/2 (intestine): 23.00 h

Ontogeny/Variability like: Undefined

Localization: Interstitial, BloodCellsMembrane, VascMembraneTissueSide

Expression Levels

| Relative expression | Name | Value  |
|---------------------|------|--------|
| VEGFA               | 0.18 | 0.18 % |
| VEGFA               | 0.18 | 0.18 % |

**Table 1.4:** Expression Levels

## 1.2 HV\_chinese

### 1.2.1 Biometrics

#### Population Properties

| Population Properties | Value                |
|-----------------------|----------------------|
| Species               | Human                |
| Population            | Asian (Tanaka, 1996) |
| Gender                | Male                 |

**Table 1.5:** Population Properties

#### Individual Parameters

| Individual Parameters | Value  | Unit              |
|-----------------------|--------|-------------------|
| Age                   | 30.00  | year(s)           |
| Weight                | 60.03  | kg                |
| Height                | 169.96 | cm                |
| BMI                   | 20.78  | kg/m <sup>2</sup> |

**Table 1.6:** Individual Parameters

**Calculation methods**

| Category                  | Calculation methods   |
|---------------------------|-----------------------|
| Endothelial surface areas | Organ vascularization |
| Body surface area         | Mosteller             |

**Table 1.7:** Calculation methods**1.2.2 Anatomy & Physiology**

Default

**1.2.3 Expression****1.2.3.1 Metabolizing Enzymes**

None

**1.2.3.2 Transport Proteins**

None

**1.2.3.3 Protein Binding Partners**

VEGFA

Reference concentration: 3.00E-4  $\mu\text{mol/l}$ 

t1/2 (liver): 36.00 h

t1/2 (intestine): 23.00 h

Ontogeny/Variability like: Undefined

Localization: Interstitial, BloodCellsMembrane, VascMembraneTissueSide

Expression Levels

| Relative expression | Name | Value  |
|---------------------|------|--------|
| VEGFA               | 0.18 | 0.18 % |
| VEGFA               | 0.18 | 0.18 % |

**Table 1.8:** Expression Levels**1.3 Patient1****1.3.1 Biometrics****Population Properties**

| Population Properties | Value                 |
|-----------------------|-----------------------|
| Species               | Human                 |
| Population            | European (ICRP, 2002) |
| Gender                | Male                  |

**Table 1.9:** Population Properties

**Individual Parameters**

| Individual Parameters | Value  | Unit              |
|-----------------------|--------|-------------------|
| Age                   | 30.00  | year(s)           |
| Weight                | 73.00  | kg                |
| Height                | 176.00 | cm                |
| BMI                   | 23.57  | kg/m <sup>2</sup> |

**Table 1.10:** Individual Parameters**Calculation methods**

| Category                  | Calculation methods   |
|---------------------------|-----------------------|
| Endothelial surface areas | Organ vascularization |
| Body surface area         | Mosteller             |

**Table 1.11:** Calculation methods**1.3.2 Anatomy & Physiology**

Default

**1.3.3 Expression****1.3.3.1 Metabolizing Enzymes**

None

**1.3.3.2 Transport Proteins**

None

**1.3.3.3 Protein Binding Partners**

VEGFA

Reference concentration: 3.00E-3 µmol/l

t1/2 (liver): 36.00 h

t1/2 (intestine): 23.00 h

Ontogeny/Variability like: Undefined

Localization: Interstitial, BloodCellsMembrane, VascMembraneTissueSide

Expression Levels

| Relative expression | Name | Value  |
|---------------------|------|--------|
| VEGFA               | 0.18 | 0.18 % |
| VEGFA               | 0.18 | 0.18 % |

**Table 1.12:** Expression Levels

## 1.4 Patient\_ped

### 1.4.1 Biometrics

#### Population Properties

| Population Properties | Value                 |
|-----------------------|-----------------------|
| Species               | Human                 |
| Population            | European (ICRP, 2002) |
| Gender                | Male                  |

**Table 1.13:** Population Properties

#### Individual Parameters

| Individual Parameters | Value  | Unit              |
|-----------------------|--------|-------------------|
| Age                   | 13.00  | year(s)           |
| Weight                | 46.40  | kg                |
| Height                | 155.40 | cm                |
| BMI                   | 19.21  | kg/m <sup>2</sup> |

**Table 1.14:** Individual Parameters

#### Calculation methods

| Category                  | Calculation methods   |
|---------------------------|-----------------------|
| Endothelial surface areas | Organ vascularization |
| Body surface area         | Mosteller             |

**Table 1.15:** Calculation methods

### 1.4.2 Anatomy & Physiology

Default

### 1.4.3 Expression

#### 1.4.3.1 Metabolizing Enzymes

None

#### 1.4.3.2 Transport Proteins

None

#### 1.4.3.3 Protein Binding Partners

VEGFA

Reference concentration: 3.86E-3  $\mu\text{mol/l}$

$t_{1/2}$  (liver): 36.00 h

$t_{1/2}$  (intestine): 23.00 h

Ontogeny/Variability like: Undefined

Localization: Interstitial, BloodCellsMembrane, VascMembraneTissueSide

Expression Levels

| Relative expression | Name | Value  |
|---------------------|------|--------|
| VEGFA               | 0.18 | 0.18 % |
| VEGFA               | 0.18 | 0.18 % |

**Table 1.16:** Expression Levels

# Chapter 2

## Compounds

### 2.1 Bevacizumab\_human

#### 2.1.1 Basic Physico-chemistry

Is small molecule: No

##### 2.1.1.1 Molecular weight

| Parameter                  | Value     | Unit  |
|----------------------------|-----------|-------|
| Molecular weight           | 150.00    | kDa   |
| Effective molecular weight | 150000.00 | g/mol |
| I                          | 0         |       |
| F                          | 0         |       |
| Cl                         | 0         |       |
| Br                         | 0         |       |

**Table 2.1:** Molecular weight

##### 2.1.1.2 Lipophilicity

| Experiment  | Lipophilicity [Log Units] |
|-------------|---------------------------|
| Measurement | −5.00                     |

**Table 2.2:** Lipophilicity

Table 2.2 lists lipophilicity values for compound Bevacizumab\_human.

##### 2.1.1.3 Fraction unbound (plasma, reference value)

| Experiment  | Fraction Unbound | Species |
|-------------|------------------|---------|
| Measurement | 1.00             | Human   |

**Table 2.3:** Fraction unbound (plasma, reference value)

Table 2.3 lists fraction unbound values for compound Bevacizumab\_human.

**2.1.1.4 Solubility**

| Experiment  | Ref-pH | Solubility at Ref-pH [mg/l] | Solubility gain per charge |
|-------------|--------|-----------------------------|----------------------------|
| Measurement | 7.00   | 9999.00                     | 1000.00                    |

**Table 2.4:** Solubility

Table 2.4 lists solubility values for compound Bevacizumab\_human.

**2.1.2 ADME****2.1.2.1 Absorption****Specific intestinal permeability**

| Experiment | Lipophilicity | Permeability [cm/min] |
|------------|---------------|-----------------------|
| Calculated | Measurement   | 0                     |

**Table 2.5:** Specific intestinal permeability

Table 2.5 lists intestinal permeability values for compound Bevacizumab\_human.

**2.1.2.2 Distribution****Specific organ permeability**

| Experiment | Lipophilicity | Permeability [cm/min] |
|------------|---------------|-----------------------|
| Calculated | Measurement   | 0                     |

**Table 2.6:** Specific organ permeability

Table 2.6 lists organ permeability values for compound Bevacizumab\_human.

**Calculation methods**

| Category                | Calculation methods |
|-------------------------|---------------------|
| Partition coefficients  | PK-Sim Standard     |
| Cellular permeabilities | PK-Sim Standard     |

**Table 2.7:** Calculation methods

VEGF 2-Paper 2

Process Type: Specific Binding

| Parameter | Value                 | Unit   |
|-----------|-----------------------|--------|
| koff      | $3.10 \times 10^{-5}$ | 1/s    |
| Kd        | 0.06                  | nmol/l |

**Table 2.8:** Parameters

VEGFA-Paper

Process Type: Specific Binding

| Parameter | Value                 | Unit   |
|-----------|-----------------------|--------|
| koff      | $3.10 \times 10^{-5}$ | 1/s    |
| Kd        | 0.06                  | nmol/l |

**Table 2.9:** Parameters

## 2.2 Bevacizumab

### 2.2.1 Basic Physico-chemistry

Is small molecule: No

#### 2.2.1.1 Molecular weight

| Parameter                  | Value     | Unit  |
|----------------------------|-----------|-------|
| Molecular weight           | 150.00    | kDa   |
| Effective molecular weight | 150000.00 | g/mol |
| I                          | 0         |       |
| F                          | 0         |       |
| Cl                         | 0         |       |
| Br                         | 0         |       |

**Table 2.10:** Molecular weight

#### 2.2.1.2 Lipophilicity

| Experiment  | Lipophilicity [Log Units] |
|-------------|---------------------------|
| Measurement | -5.00                     |

**Table 2.11:** Lipophilicity

Table 2.11 lists lipophilicity values for compound Bevacizumab.

#### 2.2.1.3 Fraction unbound (plasma, reference value)

| Experiment  | Fraction Unbound | Species |
|-------------|------------------|---------|
| Measurement | 1.00             | Human   |

**Table 2.12:** Fraction unbound (plasma, reference value)

Table 2.12 lists fraction unbound values for compound Bevacizumab.



## 2.2.1.4 Solubility

| Experiment  | Ref-pH | Solubility at Ref-pH [mg/l] | Solubility gain per charge |
|-------------|--------|-----------------------------|----------------------------|
| Measurement | 7.00   | 9999.00                     | 1000.00                    |

Table 2.13: Solubility

Table 2.13 lists solubility values for compound Bevacizumab.

## 2.2.2 ADME

## 2.2.2.1 Absorption

## Specific intestinal permeability

| Experiment | Lipophilicity | Permeability [cm/min] |
|------------|---------------|-----------------------|
| Calculated | Measurement   | 0                     |

Table 2.14: Specific intestinal permeability

Table 2.14 lists intestinal permeability values for compound Bevacizumab.

## 2.2.2.2 Distribution

## Specific organ permeability

| Experiment | Lipophilicity | Permeability [cm/min] |
|------------|---------------|-----------------------|
| Calculated | Measurement   | 0                     |

Table 2.15: Specific organ permeability

Table 2.15 lists organ permeability values for compound Bevacizumab.

## Calculation methods

| Category                | Calculation methods |
|-------------------------|---------------------|
| Partition coefficients  | PK-Sim Standard     |
| Cellular permeabilities | PK-Sim Standard     |

Table 2.16: Calculation methods

VEGF 2-Paper 2

Process Type: Specific Binding

| Parameter | Value                 | Unit   |
|-----------|-----------------------|--------|
| koff      | $3.10 \times 10^{-5}$ | 1/s    |
| Kd        | 0.06                  | nmol/l |

Table 2.17: Parameters

VEGFA-Paper

Process Type: Specific Binding

| Parameter | Value                 | Unit   |
|-----------|-----------------------|--------|
| koff      | $3.10 \times 10^{-5}$ | 1/s    |
| Kd        | 0.06                  | nmol/l |

**Table 2.18:** Parameters

## Chapter 3

# Protocols

### 3.1 Perfusion 90 min\_1mg/kg

| Property            | Value                |
|---------------------|----------------------|
| Process Type        | Simple protocol      |
| Administration type | Intravenous Infusion |
| Dosing interval     | Single               |

**Table 3.1**

| Parameter     | Value | Unit  |
|---------------|-------|-------|
| Dose          | 1.00  | mg/kg |
| Infusion time | 90.00 | min   |

**Table 3.2:** Parameters

### 3.2 Perfusion 90 min\_3mg/kg

| Property            | Value                |
|---------------------|----------------------|
| Process Type        | Simple protocol      |
| Administration type | Intravenous Infusion |
| Dosing interval     | Single               |

**Table 3.3**

| Parameter     | Value | Unit  |
|---------------|-------|-------|
| Dose          | 3.00  | mg/kg |
| Infusion time | 90.00 | min   |

**Table 3.4:** Parameters

### 3.3 Perfusion 90 min\_0.5mg/kg

| Property            | Value                |
|---------------------|----------------------|
| Process Type        | Simple protocol      |
| Administration type | Intravenous Infusion |
| Dosing interval     | Single               |

Table 3.5

| Parameter     | Value | Unit  |
|---------------|-------|-------|
| Dose          | 0.50  | mg/kg |
| Infusion time | 90.00 | min   |

Table 3.6: Parameters

### 3.4 Infusion 0.3mg/kg human

#### Schema 1

- Start time: 0 day(s)
- Number of Repetitions: 1.00
- Time Between Repetitions: 0 h
- **Dosing**
  - Start time: 0 h
  - Dose: 0.30 mg/kg
  - Administration type: Intravenous Infusion
  - **Parameters**
    - \* Dose: 0.30 mg/kg
    - \* Infusion time: 90.00 min

#### Schema 2

- Start time: 28.00 day(s)
- Number of Repetitions: 1.00
- Time Between Repetitions: 0 h
- **Dosing**
  - Start time: 0 h
  - Dose: 0.30 mg/kg
  - Administration type: Intravenous Infusion
  - **Parameters**
    - \* Dose: 0.30 mg/kg
    - \* Infusion time: 60.00 min

#### Schema 3

- Start time: 35.00 day(s)
- Number of Repetitions: 1.00

- Time Between Repetitions: 0 h
- **Dosing**
  - Start time: 0 h
  - Dose: 0.30 mg/kg
  - Administration type: Intravenous Infusion
  - **Parameters**
    - \* Dose: 0.30 mg/kg
    - \* Infusion time: 60.00 min

**Schema 4**

- Start time: 42.00 day(s)
- Number of Repetitions: 1.00
- Time Between Repetitions: 0 h
- **Dosing**
  - Start time: 0 h
  - Dose: 0.30 mg/kg
  - Administration type: Intravenous Infusion
  - **Parameters**
    - \* Dose: 0.30 mg/kg
    - \* Infusion time: 60.00 min

## 3.5 Infusion 10mg/kg human

**Schema 1**

- Start time: 0 h
- Number of Repetitions: 1.00
- Time Between Repetitions: 0 h
- **Dosing**
  - Start time: 0 h
  - Dose: 10.00 mg/kg
  - Administration type: Intravenous Infusion
  - **Parameters**
    - \* Dose: 10.00 mg/kg
    - \* Infusion time: 90.00 min

**Schema 2**

- Start time: 28.00 day(s)
- Number of Repetitions: 1.00
- Time Between Repetitions: 0 h
- **Dosing**
  - Start time: 0 h
  - Dose: 10.00 mg/kg
  - Administration type: Intravenous Infusion

- **Parameters**

- \* Dose: 10.00 mg/kg
- \* Infusion time: 60.00 min

**Schema 3**

- Start time: 35.00 day(s)
- Number of Repetitions: 1.00
- Time Between Repetitions: 0 h
- **Dosing**
  - Start time: 0 h
  - Dose: 10.00 mg/kg
  - Administration type: Intravenous Infusion
- **Parameters**
  - \* Dose: 10.00 mg/kg
  - \* Infusion time: 60.00 min

**Schema 4**

- Start time: 42.00 day(s)
- Number of Repetitions: 1.00
- Time Between Repetitions: 0 h
- **Dosing**
  - Start time: 0 h
  - Dose: 10.00 mg/kg
  - Administration type: Intravenous Infusion
- **Parameters**
  - \* Dose: 10.00 mg/kg
  - \* Infusion time: 60.00 min

## 3.6 Infusion 1mg/kg human

**Schema 1**

- Start time: 0 day(s)
- Number of Repetitions: 1.00
- Time Between Repetitions: 90.00 min
- **Dosing**
  - Start time: 0 h
  - Dose: 1.00 mg/kg
  - Administration type: Intravenous Infusion
- **Parameters**
  - \* Dose: 1.00 mg/kg
  - \* Infusion time: 90.00 min

**Schema 3**

- Start time: 28.00 day(s)

- Number of Repetitions: 1.00
- Time Between Repetitions: 90.00 min
- **Dosing**
  - Start time: 0 h
  - Dose: 1.00 mg/kg
  - Administration type: Intravenous Infusion
  - **Parameters**
    - \* Dose: 1.00 mg/kg
    - \* Infusion time: 60.00 min

#### Schema 4

- Start time: 35.00 day(s)
- Number of Repetitions: 1.00
- Time Between Repetitions: 90.00 min
- **Dosing**
  - Start time: 0 h
  - Dose: 1.00 mg/kg
  - Administration type: Intravenous Infusion
  - **Parameters**
    - \* Dose: 1.00 mg/kg
    - \* Infusion time: 60.00 min

#### Schema 5

- Start time: 42.00 day(s)
- Number of Repetitions: 1.00
- Time Between Repetitions: 90.00 min
- **Dosing**
  - Start time: 0 h
  - Dose: 1.00 mg/kg
  - Administration type: Intravenous Infusion
  - **Parameters**
    - \* Dose: 1.00 mg/kg
    - \* Infusion time: 60.00 min

## 3.7 Infusion 3mg/kg human

#### Schema 1

- Start time: 0 day(s)
- Number of Repetitions: 1.00
- Time Between Repetitions: 0 h
- **Dosing**
  - Start time: 0 h

- Dose: 3.00 mg/kg
- Administration type: Intravenous Infusion
- **Parameters**
  - \* Dose: 3.00 mg/kg
  - \* Infusion time: 60.00 min

**Schema 2**

- Start time: 28.00 day(s)
- Number of Repetitions: 1.00
- Time Between Repetitions: 0 h
- **Dosing**
  - Start time: 0 h
  - Dose: 3.00 mg/kg
  - Administration type: Intravenous Infusion
  - **Parameters**
    - \* Dose: 3.00 mg/kg
    - \* Infusion time: 60.00 min

**Schema 3**

- Start time: 35.00 day(s)
- Number of Repetitions: 1.00
- Time Between Repetitions: 0 h
- **Dosing**
  - Start time: 0 h
  - Dose: 3.00 mg/kg
  - Administration type: Intravenous Infusion
  - **Parameters**
    - \* Dose: 3.00 mg/kg
    - \* Infusion time: 60.00 min

**Schema 4**

- Start time: 42.00 day(s)
- Number of Repetitions: 1.00
- Time Between Repetitions: 0 h
- **Dosing**
  - Start time: 0 h
  - Dose: 3.00 mg/kg
  - Administration type: Intravenous Infusion
  - **Parameters**
    - \* Dose: 3.00 mg/kg
    - \* Infusion time: 60.00 min



### 3.8 5mpk\_every2weeks

#### Schema 1

- Start time: 0 h
- Number of Repetitions: 7.00
- Time Between Repetitions: 14.00 day(s)
- **Dosing**
  - Start time: 0 h
  - Dose: 5.00 mg/kg
  - Administration type: Intravenous Infusion
  - **Parameters**
    - \* Dose: 5.00 mg/kg
    - \* Infusion time: 60.00 min

### 3.9 Infusion\_5mg/kg

| Property            | Value                |
|---------------------|----------------------|
| Process Type        | Simple protocol      |
| Administration type | Intravenous Infusion |
| Dosing interval     | Single               |

**Table 3.7**

| Parameter     | Value | Unit  |
|---------------|-------|-------|
| Dose          | 5.00  | mg/kg |
| Infusion time | 60.00 | min   |

**Table 3.8:** Parameters

### 3.10 Infusion\_15mg/kg

| Property            | Value                |
|---------------------|----------------------|
| Process Type        | Simple protocol      |
| Administration type | Intravenous Infusion |
| Dosing interval     | Single               |

**Table 3.9**

| Parameter     | Value | Unit  |
|---------------|-------|-------|
| Dose          | 15.00 | mg/kg |
| Infusion time | 60.00 | min   |

**Table 3.10:** Parameters

## Part II

# Simulations

# Chapter 1

## HV\_1mg/kg

### 1.1 Used building blocks

| Building Block | Name                                                |
|----------------|-----------------------------------------------------|
| Individual     | HV1 (see section 1.1 in Part I)                     |
| Compound       | Bevacizumab (see section 2.2 in Part I)             |
| Protocol       | Perfusion 90 min_1mg/kg (see section 3.1 in Part I) |

**Table 1.1:** Building Block

### 1.2 Simulation Properties

#### 1.2.1 Model Structure

Allow aging

No

#### Calculation methods

| Category                  | Calculation methods   |
|---------------------------|-----------------------|
| Endothelial surface areas | Organ vascularization |
| Body surface area         | Mosteller             |

**Table 1.2:** Calculation methods

#### 1.2.2 Compounds

##### 1.2.2.1 Bevacizumab

#### Compound Configuration

| Parameter                                  | Alternative in compound | Value   | Unit      |
|--------------------------------------------|-------------------------|---------|-----------|
| Solubility                                 | Measurement             | 9999.00 | mg/l      |
| Lipophilicity                              | Measurement             | −5.00   | Log Units |
| Fraction unbound (plasma, reference value) | Measurement             | 1.00    |           |
| <i>continued on next page</i>              |                         |         |           |

| <i>continued from previous page</i> |                         |       |        |
|-------------------------------------|-------------------------|-------|--------|
| Parameter                           | Alternative in compound | Value | Unit   |
| Specific organ permeability         | Calculated              | 0     | cm/min |
| Specific intestinal permeability    | Calculated              | 0     | cm/min |

**Table 1.3:** Compound Configuration**Calculation methods**

| Category                | Calculation methods |
|-------------------------|---------------------|
| Partition coefficients  | PK-Sim Standard     |
| Cellular permeabilities | PK-Sim Standard     |

**Table 1.4:** Calculation methods**1.2.3 Processes****1.2.3.1 Bevacizumab****Specific Binding**

Mapping VEGFA with VEGFA-Paper

**1.2.4 Administration****1.2.4.1 Bevacizumab****Simple protocol**

Intravenous Infusion

Dosing interval: Single

Dose: 1.00 mg/kg

Infusion time: 90.00 min

**1.3 Charts**

### 1.3.1 Time Profile Analysis

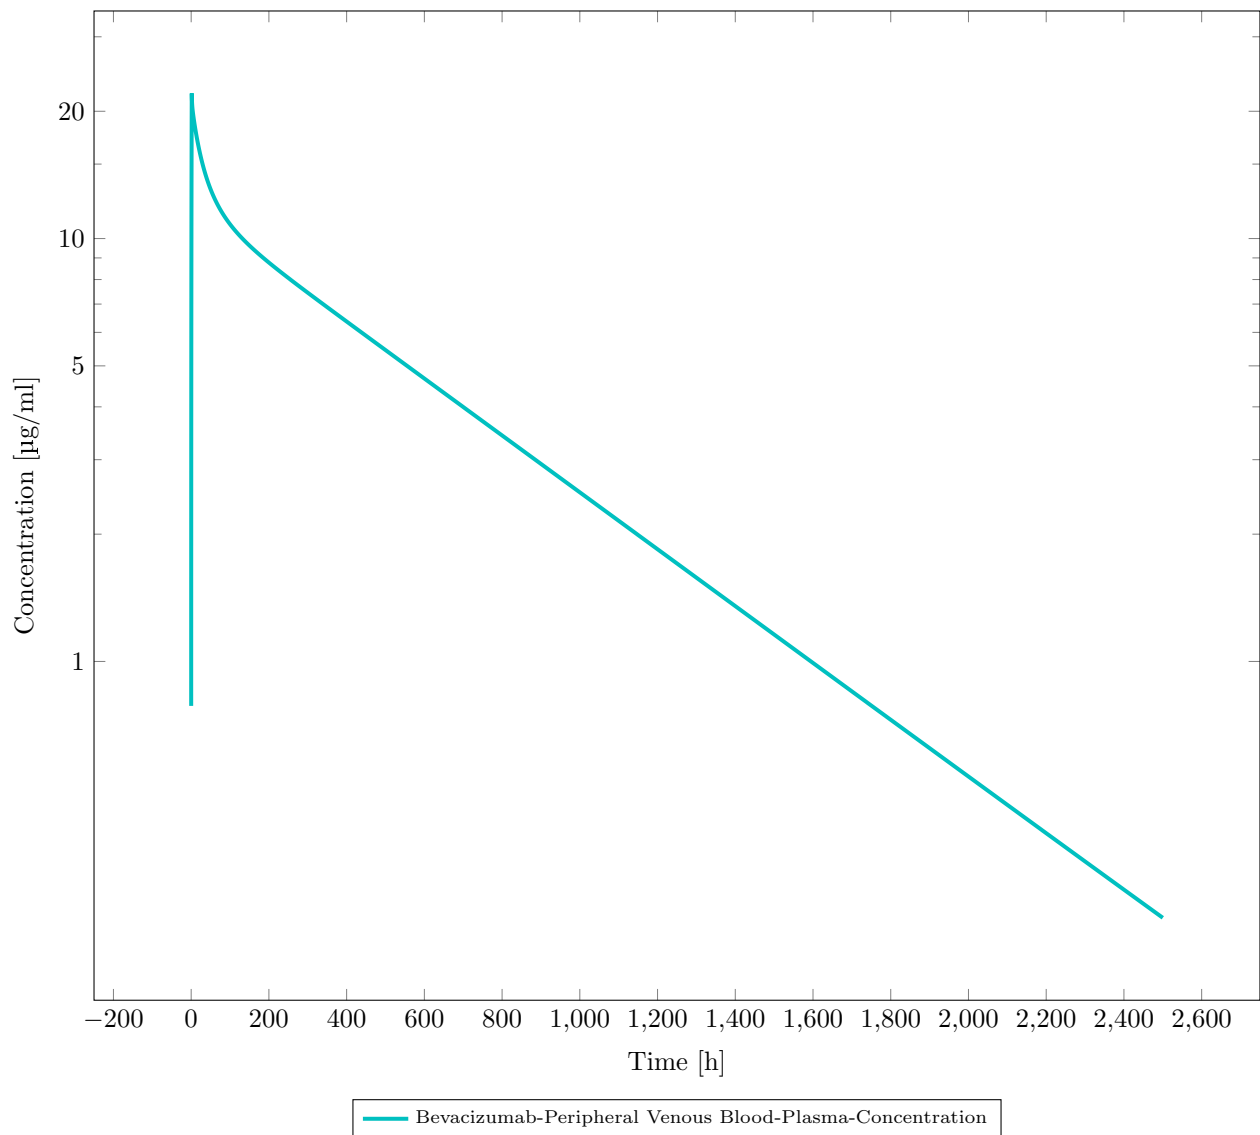

**Figure 1.1**

#### 1.3.1.1 Global PK-Analyses

| Parameter              | Compound    | Value                 | Unit      |
|------------------------|-------------|-----------------------|-----------|
| Vss (plasma)           | Bevacizumab | 78.17                 | ml/kg     |
| Vd (plasma)            | Bevacizumab | 82.14                 | ml/kg     |
| Vss (phys-chem)        | Bevacizumab | 623.05                | ml/kg     |
| Total plasma clearance | Bevacizumab | $2.09 \times 10^{-3}$ | ml/min/kg |

**Table 1.5:** Global PK-Analyses

#### 1.3.1.2 PK-Analyses

**Bevacizumab-Peripheral Venous Blood-Plasma-Concentration**

| Parameter                    | Value                 | Unit       |
|------------------------------|-----------------------|------------|
| C <sub>max</sub>             | 0.15                  | μmol/l     |
| C <sub>max_norm</sub>        | $2.20 \times 10^7$    | mg/l       |
| t <sub>max</sub>             | 1.50                  | h          |
| C <sub>tEnd</sub>            | $1.65 \times 10^{-3}$ | μmol/l     |
| AUC <sub>tEnd</sub>          | 3117.62               | μmol*min/l |
| AUC <sub>tEnd_norm</sub>     | $4.68 \times 10^{14}$ | μg*min/l   |
| AUC <sub>inf</sub>           | 3182.35               | μmol*min/l |
| AUC <sub>inf_norm</sub>      | $4.77 \times 10^{14}$ | μg*min/l   |
| MRT                          | 621.93                | h          |
| Half-Life                    | 452.95                | h          |
| % AUC (t <sub>last</sub> -∞) | 0.02                  |            |
| Total body clearance/F       | $2.09 \times 10^{-3}$ | ml/min/kg  |
| V <sub>ss</sub> (plasma)/F   | 78.17                 | ml/kg      |
| V <sub>d</sub> (plasma)/F    | 82.14                 | ml/kg      |

**Table 1.6:** PK-Analyses for Bevacizumab-Peripheral Venous Blood-Plasma-Concentration**Beva\_Demarchi2021\_HV\_1mpk..Human.iv perfusion.1.Bevacizumab\_human\_sim-Bevacizumab\_human\_-sim-Measurement**

| Parameter                    | Value                 | Unit       |
|------------------------------|-----------------------|------------|
| C <sub>max</sub>             | 0.15                  | μmol/l     |
| C <sub>max_norm</sub>        | NaN                   | mg/l       |
| t <sub>max</sub>             | 4.86                  | h          |
| C <sub>tEnd</sub>            | $7.71 \times 10^{-5}$ | μmol/l     |
| AUC <sub>tEnd</sub>          | 2942.18               | μmol*min/l |
| AUC <sub>tEnd_norm</sub>     | NaN                   | μg*min/l   |
| AUC <sub>inf</sub>           | 2942.77               | μmol*min/l |
| AUC <sub>inf_norm</sub>      | NaN                   | μg*min/l   |
| MRT                          | 448.08                | h          |
| Half-Life                    | 89.57                 | h          |
| % AUC (t <sub>last</sub> -∞) | $2.03 \times 10^{-4}$ |            |
| Total body clearance/F       | NaN                   | ml/min/kg  |
| V <sub>ss</sub> (plasma)/F   | NaN                   | ml/kg      |
| V <sub>d</sub> (plasma)/F    | NaN                   | ml/kg      |

**Table 1.7:** PK-Analyses for Beva\_Demarchi2021\_HV\_1mpk..Human.iv perfusion.1.Bevacizumab\_human\_sim-Bevacizumab\_human\_-sim-Measurement**Beva\_Hetema2017\_HV\_1mpk..Human.iv perfusion.1.Bevacizumab\_human\_sim-Bevacizumab\_human\_-sim-Measurement**

| Parameter                    | Value                 | Unit       |
|------------------------------|-----------------------|------------|
| C <sub>max</sub>             | 0.16                  | μmol/l     |
| C <sub>max_norm</sub>        | NaN                   | mg/l       |
| t <sub>max</sub>             | 0.64                  | h          |
| C <sub>tEnd</sub>            | $8.38 \times 10^{-3}$ | μmol/l     |
| AUC <sub>tEnd</sub>          | 2638.13               | μmol*min/l |
| AUC <sub>tEnd_norm</sub>     | NaN                   | μg*min/l   |
| AUC <sub>inf</sub>           | NaN                   | μmol*min/l |
| AUC <sub>inf_norm</sub>      | NaN                   | μg*min/l   |
| MRT                          | NaN                   | h          |
| Half-Life                    | Infinity              | h          |
| % AUC (t <sub>last</sub> -∞) | NaN                   |            |
| Total body clearance/F       | NaN                   | ml/min/kg  |
| V <sub>ss</sub> (plasma)/F   | NaN                   | ml/kg      |
| V <sub>d</sub> (plasma)/F    | NaN                   | ml/kg      |

**Table 1.8:** PK-Analyses for Beva\_Hetema2017\_HV\_1mpk..Human.iv perfusion.1.Bevacizumab\_human\_sim-Bevacizumab\_human\_sim-Measurement

**Beva\_Hummel2022\_HV\_1mpk..Human.iv perfusion.1.Bevacizumab\_human\_sim-Bevacizumab\_human\_sim-Measurement**

| Parameter                    | Value                 | Unit       |
|------------------------------|-----------------------|------------|
| C <sub>max</sub>             | 0.17                  | μmol/l     |
| C <sub>max_norm</sub>        | NaN                   | mg/l       |
| t <sub>max</sub>             | 1.50                  | h          |
| C <sub>tEnd</sub>            | $6.47 \times 10^{-4}$ | μmol/l     |
| AUC <sub>tEnd</sub>          | 3230.16               | μmol*min/l |
| AUC <sub>tEnd_norm</sub>     | NaN                   | μg*min/l   |
| AUC <sub>inf</sub>           | 3241.46               | μmol*min/l |
| AUC <sub>inf_norm</sub>      | NaN                   | μg*min/l   |
| MRT                          | 476.41                | h          |
| Half-Life                    | 201.77                | h          |
| % AUC (t <sub>last</sub> -∞) | $3.49 \times 10^{-3}$ |            |
| Total body clearance/F       | NaN                   | ml/min/kg  |
| V <sub>ss</sub> (plasma)/F   | NaN                   | ml/kg      |
| V <sub>d</sub> (plasma)/F    | NaN                   | ml/kg      |

**Table 1.9:** PK-Analyses for Beva\_Hummel2022\_HV\_1mpk..Human.iv perfusion.1.Bevacizumab\_human\_sim-Bevacizumab\_human\_sim-Measurement

**Beva\_wu2019\_HV\_1mpk..Human.iv perfusion.1.Bevacizumab\_human\_sim.1-Bevacizumab\_human\_sim-Measurement**

| Parameter                     | Value | Unit   |
|-------------------------------|-------|--------|
| C <sub>max</sub>              | 0.17  | μmol/l |
| <i>continued on next page</i> |       |        |

| <i>continued from previous page</i> |                       |                       |
|-------------------------------------|-----------------------|-----------------------|
| Parameter                           | Value                 | Unit                  |
| C_max_norm                          | NaN                   | mg/l                  |
| t_max                               | 1.50                  | h                     |
| C_tEnd                              | $1.18 \times 10^{-3}$ | $\mu\text{mol/l}$     |
| AUC_tEnd                            | 2779.89               | $\mu\text{mol*min/l}$ |
| AUC_tEnd_norm                       | NaN                   | $\mu\text{g*min/l}$   |
| AUC_inf                             | 2821.02               | $\mu\text{mol*min/l}$ |
| AUC_inf_norm                        | NaN                   | $\mu\text{g*min/l}$   |
| MRT                                 | 532.48                | h                     |
| Half-Life                           | 404.25                | h                     |
| % AUC (tlast- $\infty$ )            | 0.01                  |                       |
| Total body clearance/F              | NaN                   | ml/min/kg             |
| Vss (plasma)/F                      | NaN                   | ml/kg                 |
| Vd (plasma)/F                       | NaN                   | ml/kg                 |

**Table 1.10:** PK-Analyses for Beva\_wu2019\_HV\_1mpk..Human.iv perfusion.1.Bevacizumab\_human\_sim.1-Bevacizumab\_human\_sim-Measurement

**Beva\_wu2019\_HV\_1mpk..Human.iv perfusion.1.Bevacizumab\_human\_sim.2-Bevacizumab\_human\_sim-Measurement**

| Parameter                | Value                 | Unit                  |
|--------------------------|-----------------------|-----------------------|
| C_max                    | 0.12                  | $\mu\text{mol/l}$     |
| C_max_norm               | NaN                   | mg/l                  |
| t_max                    | 14.58                 | h                     |
| C_tEnd                   | $2.20 \times 10^{-4}$ | $\mu\text{mol/l}$     |
| AUC_tEnd                 | 2257.21               | $\mu\text{mol*min/l}$ |
| AUC_tEnd_norm            | NaN                   | $\mu\text{g*min/l}$   |
| AUC_inf                  | NaN                   | $\mu\text{mol*min/l}$ |
| AUC_inf_norm             | NaN                   | $\mu\text{g*min/l}$   |
| MRT                      | NaN                   | h                     |
| Half-Life                | Infinity              | h                     |
| % AUC (tlast- $\infty$ ) | NaN                   |                       |
| Total body clearance/F   | NaN                   | ml/min/kg             |
| Vss (plasma)/F           | NaN                   | ml/kg                 |
| Vd (plasma)/F            | NaN                   | ml/kg                 |

**Table 1.11:** PK-Analyses for Beva\_wu2019\_HV\_1mpk..Human.iv perfusion.1.Bevacizumab\_human\_sim.2-Bevacizumab\_human\_sim-Measurement

**Beva\_wu2019\_HV\_1mpk..Human.iv perfusion.1.Bevacizumab\_human\_sim.3-Bevacizumab\_human\_sim-Measurement**

| Parameter                     | Value | Unit              |
|-------------------------------|-------|-------------------|
| C_max                         | 0.12  | $\mu\text{mol/l}$ |
| <i>continued on next page</i> |       |                   |



| continued from previous page |                       |                       |
|------------------------------|-----------------------|-----------------------|
| Parameter                    | Value                 | Unit                  |
| C_max_norm                   | NaN                   | mg/l                  |
| t_max                        | 14.58                 | h                     |
| C_tEnd                       | $2.48 \times 10^{-3}$ | $\mu\text{mol/l}$     |
| AUC_tEnd                     | 2995.12               | $\mu\text{mol*min/l}$ |
| AUC_tEnd_norm                | NaN                   | $\mu\text{g*min/l}$   |
| AUC_inf                      | NaN                   | $\mu\text{mol*min/l}$ |
| AUC_inf_norm                 | NaN                   | $\mu\text{g*min/l}$   |
| MRT                          | NaN                   | h                     |
| Half-Life                    | Infinity              | h                     |
| % AUC (tlast- $\infty$ )     | NaN                   |                       |
| Total body clearance/F       | NaN                   | ml/min/kg             |
| Vss (plasma)/F               | NaN                   | ml/kg                 |
| Vd (plasma)/F                | NaN                   | ml/kg                 |

**Table 1.12:** PK-Analyses for Beva\_wu2019\_HV\_1mpk..Human.iv perfusion.1.Bevacizumab\_human\_sim.3-Bevacizumab\_human\_sim-Measurement

## Chapter 2

# HV\_3mg/kg

### 2.1 Used building blocks

| Building Block | Name                                                |
|----------------|-----------------------------------------------------|
| Individual     | HV1 (see section 1.1 in Part I)                     |
| Compound       | Bevacizumab (see section 2.2 in Part I)             |
| Protocol       | Perfusion 90 min_3mg/kg (see section 3.2 in Part I) |

**Table 2.1:** Building Block

### 2.2 Simulation Properties

#### 2.2.1 Model Structure

Allow aging

No

#### Calculation methods

| Category                  | Calculation methods   |
|---------------------------|-----------------------|
| Endothelial surface areas | Organ vascularization |
| Body surface area         | Mosteller             |

**Table 2.2:** Calculation methods

#### 2.2.2 Compounds

##### 2.2.2.1 Bevacizumab

#### Compound Configuration

| Parameter                                  | Alternative in compound | Value   | Unit      |
|--------------------------------------------|-------------------------|---------|-----------|
| Solubility                                 | Measurement             | 9999.00 | mg/l      |
| Lipophilicity                              | Measurement             | −5.00   | Log Units |
| Fraction unbound (plasma, reference value) | Measurement             | 1.00    |           |
| <i>continued on next page</i>              |                         |         |           |

| <i>continued from previous page</i> |                         |       |        |
|-------------------------------------|-------------------------|-------|--------|
| Parameter                           | Alternative in compound | Value | Unit   |
| Specific organ permeability         | Calculated              | 0     | cm/min |
| Specific intestinal permeability    | Calculated              | 0     | cm/min |

**Table 2.3:** Compound Configuration**Calculation methods**

| Category                | Calculation methods |
|-------------------------|---------------------|
| Partition coefficients  | PK-Sim Standard     |
| Cellular permeabilities | PK-Sim Standard     |

**Table 2.4:** Calculation methods**2.2.3 Processes****2.2.3.1 Bevacizumab****Specific Binding**

Mapping VEGFA with VEGFA-Paper

**2.2.4 Administration****2.2.4.1 Bevacizumab****Simple protocol**

Intravenous Infusion

Dosing interval: Single

Dose: 3.00 mg/kg

Infusion time: 90.00 min

**2.3 Charts**

### 2.3.1 Time Profile Analysis

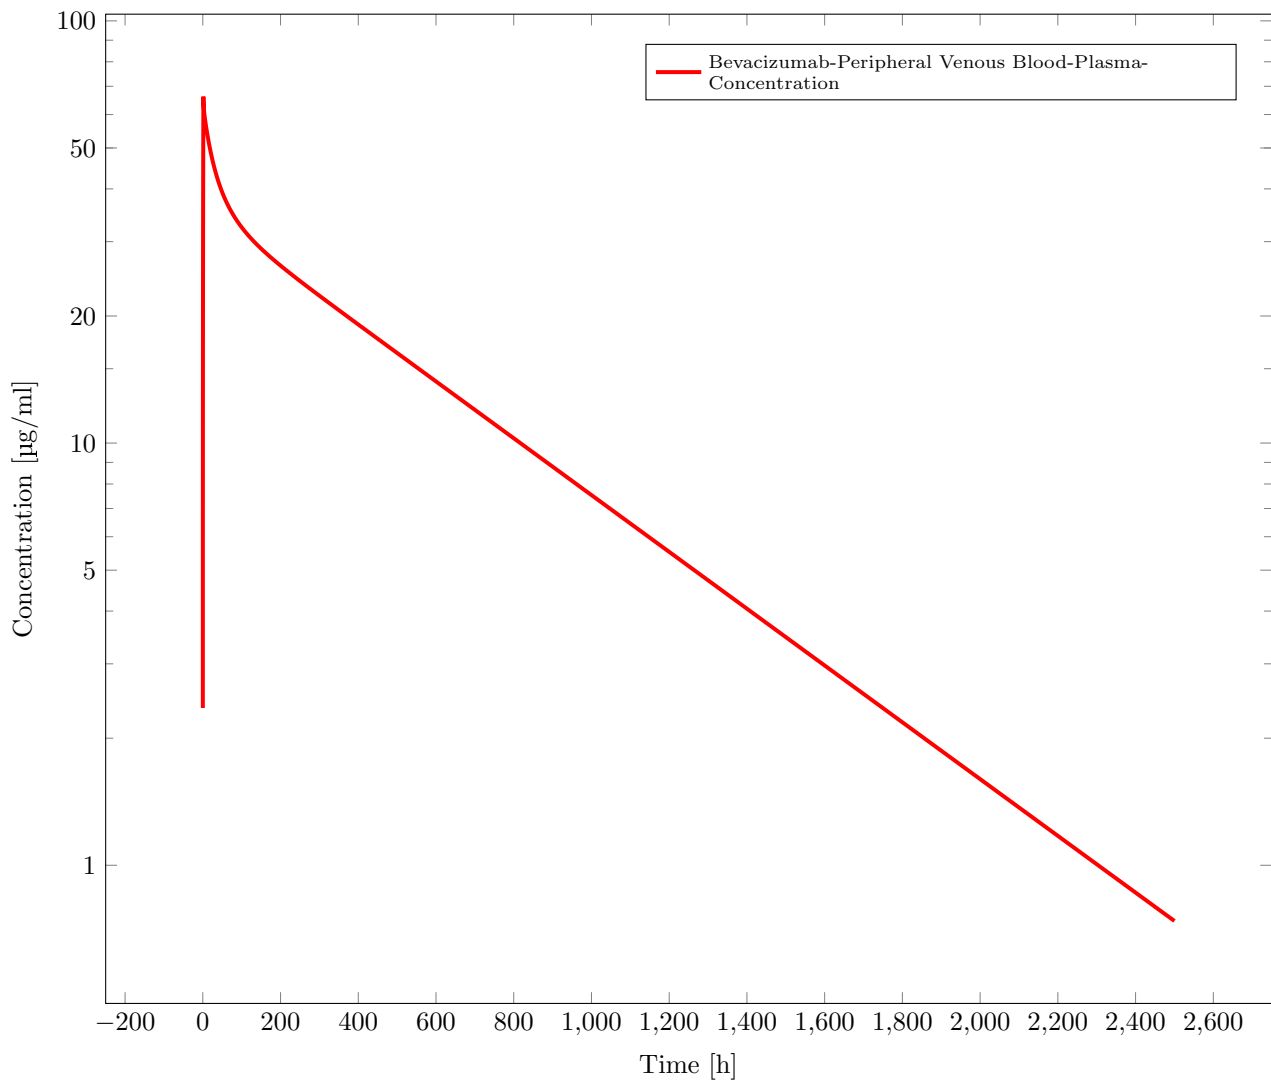

Figure 2.1

#### 2.3.1.1 Global PK-Analyses

| Parameter              | Compound    | Value                 | Unit      |
|------------------------|-------------|-----------------------|-----------|
| Vss (plasma)           | Bevacizumab | 78.05                 | ml/kg     |
| Vd (plasma)            | Bevacizumab | 81.35                 | ml/kg     |
| Vss (phys-chem)        | Bevacizumab | 623.05                | ml/kg     |
| Total plasma clearance | Bevacizumab | $2.10 \times 10^{-3}$ | ml/min/kg |

Table 2.5: Global PK-Analyses

#### 2.3.1.2 PK-Analyses

**Bevacizumab-Peripheral Venous Blood-Plasma-Concentration**

| Parameter                    | Value                 | Unit       |
|------------------------------|-----------------------|------------|
| C <sub>max</sub>             | 0.44                  | μmol/l     |
| C <sub>max_norm</sub>        | $2.21 \times 10^7$    | mg/l       |
| t <sub>max</sub>             | 1.50                  | h          |
| C <sub>tEnd</sub>            | $4.92 \times 10^{-3}$ | μmol/l     |
| AUC <sub>tEnd</sub>          | 9350.65               | μmol*min/l |
| AUC <sub>tEnd_norm</sub>     | $4.68 \times 10^{14}$ | μg*min/l   |
| AUC <sub>inf</sub>           | 9541.60               | μmol*min/l |
| AUC <sub>inf_norm</sub>      | $4.77 \times 10^{14}$ | μg*min/l   |
| MRT                          | 620.64                | h          |
| Half-Life                    | 448.34                | h          |
| % AUC (t <sub>last</sub> -∞) | 0.02                  |            |
| Total body clearance/F       | $2.10 \times 10^{-3}$ | ml/min/kg  |
| V <sub>ss</sub> (plasma)/F   | 78.05                 | ml/kg      |
| V <sub>d</sub> (plasma)/F    | 81.35                 | ml/kg      |

**Table 2.6:** PK-Analyses for Bevacizumab-Peripheral Venous Blood-Plasma-Concentration**Beva\_sinn2021\_HV\_3mpk..Human.iv perfusion.3.Bevacizumab\_human\_sim-Bevacizumab\_human\_-sim-Measurement**

| Parameter                    | Value                 | Unit       |
|------------------------------|-----------------------|------------|
| C <sub>max</sub>             | 0.56                  | μmol/l     |
| C <sub>max_norm</sub>        | NaN                   | mg/l       |
| t <sub>max</sub>             | 0.94                  | h          |
| C <sub>tEnd</sub>            | $6.84 \times 10^{-3}$ | μmol/l     |
| AUC <sub>tEnd</sub>          | 13496.98              | μmol*min/l |
| AUC <sub>tEnd_norm</sub>     | NaN                   | μg*min/l   |
| AUC <sub>inf</sub>           | 13722.24              | μmol*min/l |
| AUC <sub>inf_norm</sub>      | NaN                   | μg*min/l   |
| MRT                          | 569.85                | h          |
| Half-Life                    | 380.52                | h          |
| % AUC (t <sub>last</sub> -∞) | 0.02                  |            |
| Total body clearance/F       | NaN                   | ml/min/kg  |
| V <sub>ss</sub> (plasma)/F   | NaN                   | ml/kg      |
| V <sub>d</sub> (plasma)/F    | NaN                   | ml/kg      |

**Table 2.7:** PK-Analyses for Beva\_sinn2021\_HV\_3mpk..Human.iv perfusion.3.Bevacizumab\_human\_sim-Bevacizumab\_human\_-sim-Measurement**Beva\_shin2020\_HV\_3mpk..Human.iv perfusion.3.Bevacizumab\_human\_sim.3-Bevacizumab\_human\_-sim-Measurement**

| Parameter                    | Value    | Unit       |
|------------------------------|----------|------------|
| C <sub>max</sub>             | 0.39     | μmol/l     |
| C <sub>max_norm</sub>        | NaN      | mg/l       |
| t <sub>max</sub>             | 47.73    | h          |
| C <sub>tEnd</sub>            | 0.02     | μmol/l     |
| AUC <sub>tEnd</sub>          | 12330.29 | μmol*min/l |
| AUC <sub>tEnd_norm</sub>     | NaN      | μg*min/l   |
| AUC <sub>inf</sub>           | NaN      | μmol*min/l |
| AUC <sub>inf_norm</sub>      | NaN      | μg*min/l   |
| MRT                          | NaN      | h          |
| Half-Life                    | Infinity | h          |
| % AUC (t <sub>last</sub> -∞) | NaN      |            |
| Total body clearance/F       | NaN      | ml/min/kg  |
| V <sub>ss</sub> (plasma)/F   | NaN      | ml/kg      |
| V <sub>d</sub> (plasma)/F    | NaN      | ml/kg      |

**Table 2.8:** PK-Analyses for Beva\_shin2020\_HV\_3mpk..Human.iv perfusion.3.Bevacizumab\_human\_sim.3-Bevacizumab\_human\_sim-Measurement

**Beva\_shin2020\_HV\_3mpk..Human.iv perfusion.3.Bevacizumab\_human\_sim.2-Bevacizumab\_human\_sim-Measurement**

| Parameter                    | Value                 | Unit       |
|------------------------------|-----------------------|------------|
| C <sub>max</sub>             | 0.27                  | μmol/l     |
| C <sub>max_norm</sub>        | NaN                   | mg/l       |
| t <sub>max</sub>             | 47.73                 | h          |
| C <sub>tEnd</sub>            | $7.79 \times 10^{-3}$ | μmol/l     |
| AUC <sub>tEnd</sub>          | 7591.91               | μmol*min/l |
| AUC <sub>tEnd_norm</sub>     | NaN                   | μg*min/l   |
| AUC <sub>inf</sub>           | NaN                   | μmol*min/l |
| AUC <sub>inf_norm</sub>      | NaN                   | μg*min/l   |
| MRT                          | NaN                   | h          |
| Half-Life                    | Infinity              | h          |
| % AUC (t <sub>last</sub> -∞) | NaN                   |            |
| Total body clearance/F       | NaN                   | ml/min/kg  |
| V <sub>ss</sub> (plasma)/F   | NaN                   | ml/kg      |
| V <sub>d</sub> (plasma)/F    | NaN                   | ml/kg      |

**Table 2.9:** PK-Analyses for Beva\_shin2020\_HV\_3mpk..Human.iv perfusion.3.Bevacizumab\_human\_sim.2-Bevacizumab\_human\_sim-Measurement

**Beva\_shin2020\_HV\_3mpk..Human.iv perfusion.3.Bevacizumab\_human\_sim.1-Bevacizumab\_human\_sim-Measurement**

| Parameter        | Value | Unit   |
|------------------|-------|--------|
| C <sub>max</sub> | 0.50  | μmol/l |

*continued on next page*

| continued from previous page |          |            |
|------------------------------|----------|------------|
| Parameter                    | Value    | Unit       |
| C_max_norm                   | NaN      | mg/l       |
| t_max                        | 1.50     | h          |
| C_tEnd                       | 0.01     | μmol/l     |
| AUC_tEnd                     | 11014.24 | μmol*min/l |
| AUC_tEnd_norm                | NaN      | μg*min/l   |
| AUC_inf                      | NaN      | μmol*min/l |
| AUC_inf_norm                 | NaN      | μg*min/l   |
| MRT                          | NaN      | h          |
| Half-Life                    | Infinity | h          |
| % AUC (tlast-∞)              | NaN      |            |
| Total body clearance/F       | NaN      | ml/min/kg  |
| Vss (plasma)/F               | NaN      | ml/kg      |
| Vd (plasma)/F                | NaN      | ml/kg      |

**Table 2.10:** PK-Analyses for Beva\_shin2020\_HV\_3mpk..Human.iv perfusion.3.Bevacizumab\_human\_sim.1-Bevacizumab\_human\_sim-Measurement

## Chapter 3

# HV\_0.5 mg/kg\_chinese

### 3.1 Used building blocks

| Building Block | Name                                                  |
|----------------|-------------------------------------------------------|
| Individual     | HV_chinese (see section 1.2 in Part I)                |
| Compound       | Bevacizumab (see section 2.2 in Part I)               |
| Protocol       | Perfusion 90 min_0.5mg/kg (see section 3.3 in Part I) |

**Table 3.1:** Building Block

### 3.2 Simulation Properties

#### 3.2.1 Model Structure

Allow aging

No

#### Calculation methods

| Category                  | Calculation methods   |
|---------------------------|-----------------------|
| Endothelial surface areas | Organ vascularization |
| Body surface area         | Mosteller             |

**Table 3.2:** Calculation methods

#### 3.2.2 Compounds

##### 3.2.2.1 Bevacizumab

#### Compound Configuration

| Parameter                                  | Alternative in compound | Value   | Unit      |
|--------------------------------------------|-------------------------|---------|-----------|
| Solubility                                 | Measurement             | 9999.00 | mg/l      |
| Lipophilicity                              | Measurement             | −5.00   | Log Units |
| Fraction unbound (plasma, reference value) | Measurement             | 1.00    |           |
| <i>continued on next page</i>              |                         |         |           |



| continued from previous page     |                         |       |        |
|----------------------------------|-------------------------|-------|--------|
| Parameter                        | Alternative in compound | Value | Unit   |
| Specific organ permeability      | Calculated              | 0     | cm/min |
| Specific intestinal permeability | Calculated              | 0     | cm/min |

**Table 3.3:** Compound Configuration**Calculation methods**

| Category                | Calculation methods |
|-------------------------|---------------------|
| Partition coefficients  | PK-Sim Standard     |
| Cellular permeabilities | PK-Sim Standard     |

**Table 3.4:** Calculation methods**3.2.3 Processes****3.2.3.1 Bevacizumab****Specific Binding**

Mapping VEGFA with VEGFA-Paper

**3.2.4 Administration****3.2.4.1 Bevacizumab****Simple protocol**

Intravenous Infusion

Dosing interval: Single

Dose: 0.50 mg/kg

Infusion time: 90.00 min

**3.3 Charts**

### 3.3.1 Time Profile Analysis

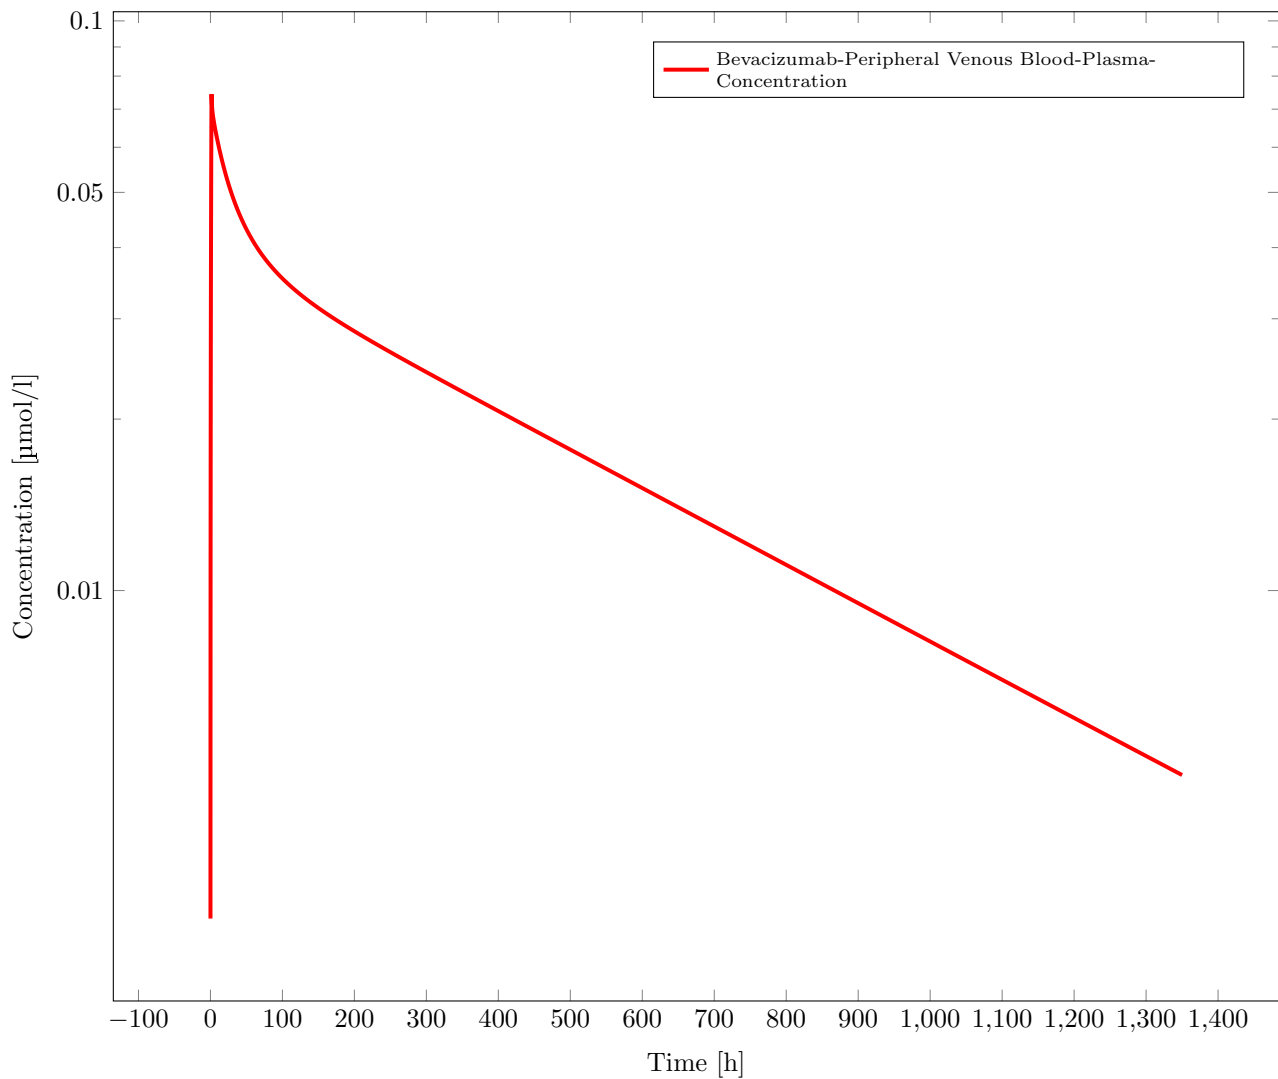

**Figure 3.1**

#### 3.3.1.1 Global PK-Analyses

| Parameter              | Compound    | Value                 | Unit      |
|------------------------|-------------|-----------------------|-----------|
| Vss (plasma)           | Bevacizumab | 79.80                 | ml/kg     |
| Vd (plasma)            | Bevacizumab | 83.77                 | ml/kg     |
| Vss (phys-chem)        | Bevacizumab | 616.73                | ml/kg     |
| Total plasma clearance | Bevacizumab | $2.14 \times 10^{-3}$ | ml/min/kg |

**Table 3.5:** Global PK-Analyses

#### 3.3.1.2 PK-Analyses

**Bevacizumab-Peripheral Venous Blood-Plasma-Concentration**

| Parameter                    | Value                 | Unit       |
|------------------------------|-----------------------|------------|
| C <sub>max</sub>             | 0.07                  | μmol/l     |
| C <sub>max_norm</sub>        | $2.23 \times 10^7$    | mg/l       |
| t <sub>max</sub>             | 1.50                  | h          |
| C <sub>tEnd</sub>            | $4.74 \times 10^{-3}$ | μmol/l     |
| AUC <sub>tEnd</sub>          | 1370.41               | μmol*min/l |
| AUC <sub>tEnd_norm</sub>     | $4.11 \times 10^{14}$ | μg*min/l   |
| AUC <sub>inf</sub>           | 1555.93               | μmol*min/l |
| AUC <sub>inf_norm</sub>      | $4.67 \times 10^{14}$ | μg*min/l   |
| MRT                          | 620.78                | h          |
| Half-Life                    | 451.72                | h          |
| % AUC (t <sub>last</sub> -∞) | 0.12                  |            |
| Total body clearance/F       | $2.14 \times 10^{-3}$ | ml/min/kg  |
| V <sub>ss</sub> (plasma)/F   | 79.80                 | ml/kg      |
| V <sub>d</sub> (plasma)/F    | 83.77                 | ml/kg      |

**Table 3.6:** PK-Analyses for Bevacizumab-Peripheral Venous Blood-Plasma-Concentration**Beva\_li2017\_HV\_0.5mpk..Human.iv perfusion.0.5.Bevacizumab\_human\_sim.1-Bevacizumab\_human\_-sim-Measurement**

| Parameter                    | Value                 | Unit       |
|------------------------------|-----------------------|------------|
| C <sub>max</sub>             | 0.04                  | μmol/l     |
| C <sub>max_norm</sub>        | NaN                   | mg/l       |
| t <sub>max</sub>             | 2.00                  | h          |
| C <sub>tEnd</sub>            | $1.00 \times 10^{-3}$ | μmol/l     |
| AUC <sub>tEnd</sub>          | 889.66                | μmol*min/l |
| AUC <sub>tEnd_norm</sub>     | NaN                   | μg*min/l   |
| AUC <sub>inf</sub>           | NaN                   | μmol*min/l |
| AUC <sub>inf_norm</sub>      | NaN                   | μg*min/l   |
| MRT                          | NaN                   | h          |
| Half-Life                    | Infinity              | h          |
| % AUC (t <sub>last</sub> -∞) | NaN                   |            |
| Total body clearance/F       | NaN                   | ml/min/kg  |
| V <sub>ss</sub> (plasma)/F   | NaN                   | ml/kg      |
| V <sub>d</sub> (plasma)/F    | NaN                   | ml/kg      |

**Table 3.7:** PK-Analyses for Beva\_li2017\_HV\_0.5mpk..Human.iv perfusion.0.5.Bevacizumab\_human\_sim.1-Bevacizumab\_human\_sim-Measurement**Beva\_li2017\_HV\_0.5mpk..Human.iv perfusion.0.5.Bevacizumab\_human\_sim.2-Bevacizumab\_human\_-sim-Measurement**

| Parameter                  | Value                 | Unit       |
|----------------------------|-----------------------|------------|
| C <sub>max</sub>           | 0.04                  | μmol/l     |
| C <sub>max_norm</sub>      | NaN                   | mg/l       |
| t <sub>max</sub>           | 2.00                  | h          |
| C <sub>tEnd</sub>          | $5.21 \times 10^{-4}$ | μmol/l     |
| AUC <sub>tEnd</sub>        | 538.67                | μmol*min/l |
| AUC <sub>tEnd_norm</sub>   | NaN                   | μg*min/l   |
| AUC <sub>inf</sub>         | NaN                   | μmol*min/l |
| AUC <sub>inf_norm</sub>    | NaN                   | μg*min/l   |
| MRT                        | NaN                   | h          |
| Half-Life                  | Infinity              | h          |
| % AUC (tlast-∞)            | NaN                   |            |
| Total body clearance/F     | NaN                   | ml/min/kg  |
| V <sub>ss</sub> (plasma)/F | NaN                   | ml/kg      |
| V <sub>d</sub> (plasma)/F  | NaN                   | ml/kg      |

**Table 3.8:** PK-Analyses for Beva\_li2017\_HV\_0.5mpk..Human.iv perfusion.0.5.Bevacizumab\_human\_sim.2-Bevacizumab\_human\_sim-Measurement

**Beva\_li2017\_HV\_0.5mpk..Human.iv perfusion.0.5.Bevacizumab\_human\_sim.3-Bevacizumab\_human\_sim-Measurement**

| Parameter                  | Value                 | Unit       |
|----------------------------|-----------------------|------------|
| C <sub>max</sub>           | 0.05                  | μmol/l     |
| C <sub>max_norm</sub>      | NaN                   | mg/l       |
| t <sub>max</sub>           | 2.00                  | h          |
| C <sub>tEnd</sub>          | $7.56 \times 10^{-4}$ | μmol/l     |
| AUC <sub>tEnd</sub>        | 1054.14               | μmol*min/l |
| AUC <sub>tEnd_norm</sub>   | NaN                   | μg*min/l   |
| AUC <sub>inf</sub>         | NaN                   | μmol*min/l |
| AUC <sub>inf_norm</sub>    | NaN                   | μg*min/l   |
| MRT                        | NaN                   | h          |
| Half-Life                  | Infinity              | h          |
| % AUC (tlast-∞)            | NaN                   |            |
| Total body clearance/F     | NaN                   | ml/min/kg  |
| V <sub>ss</sub> (plasma)/F | NaN                   | ml/kg      |
| V <sub>d</sub> (plasma)/F  | NaN                   | ml/kg      |

**Table 3.9:** PK-Analyses for Beva\_li2017\_HV\_0.5mpk..Human.iv perfusion.0.5.Bevacizumab\_human\_sim.3-Bevacizumab\_human\_sim-Measurement

**Beva\_li2017\_HV\_0.5mpk..Human.iv perfusion.0.5.Bevacizumab\_human\_sim.4-Bevacizumab\_human\_sim-Measurement**

| Parameter                     | Value | Unit   |
|-------------------------------|-------|--------|
| C <sub>max</sub>              | 0.05  | μmol/l |
| <i>continued on next page</i> |       |        |

| continued from previous page |                       |                       |
|------------------------------|-----------------------|-----------------------|
| Parameter                    | Value                 | Unit                  |
| C_max_norm                   | NaN                   | mg/l                  |
| t_max                        | 2.00                  | h                     |
| C_tEnd                       | $1.17 \times 10^{-3}$ | $\mu\text{mol/l}$     |
| AUC_tEnd                     | 914.90                | $\mu\text{mol*min/l}$ |
| AUC_tEnd_norm                | NaN                   | $\mu\text{g*min/l}$   |
| AUC_inf                      | NaN                   | $\mu\text{mol*min/l}$ |
| AUC_inf_norm                 | NaN                   | $\mu\text{g*min/l}$   |
| MRT                          | NaN                   | h                     |
| Half-Life                    | Infinity              | h                     |
| % AUC (tlast- $\infty$ )     | NaN                   |                       |
| Total body clearance/F       | NaN                   | ml/min/kg             |
| Vss (plasma)/F               | NaN                   | ml/kg                 |
| Vd (plasma)/F                | NaN                   | ml/kg                 |

**Table 3.10:** PK-Analyses for Beva\_li2017\_HV\_0.5mpk..Human.iv perfusion.0.5.Bevacizumab\_human\_sim.4-Bevacizumab\_human\_sim-Measurement

Beva\_li2017\_HV\_0.5mpk..Human.iv perfusion.0.5.Bevacizumab\_human\_sim.5-Bevacizumab\_human\_sim-Measurement

| Parameter                | Value                 | Unit                  |
|--------------------------|-----------------------|-----------------------|
| C_max                    | 0.05                  | $\mu\text{mol/l}$     |
| C_max_norm               | NaN                   | mg/l                  |
| t_max                    | 2.00                  | h                     |
| C_tEnd                   | $1.08 \times 10^{-3}$ | $\mu\text{mol/l}$     |
| AUC_tEnd                 | 766.72                | $\mu\text{mol*min/l}$ |
| AUC_tEnd_norm            | NaN                   | $\mu\text{g*min/l}$   |
| AUC_inf                  | NaN                   | $\mu\text{mol*min/l}$ |
| AUC_inf_norm             | NaN                   | $\mu\text{g*min/l}$   |
| MRT                      | NaN                   | h                     |
| Half-Life                | Infinity              | h                     |
| % AUC (tlast- $\infty$ ) | NaN                   |                       |
| Total body clearance/F   | NaN                   | ml/min/kg             |
| Vss (plasma)/F           | NaN                   | ml/kg                 |
| Vd (plasma)/F            | NaN                   | ml/kg                 |

**Table 3.11:** PK-Analyses for Beva\_li2017\_HV\_0.5mpk..Human.iv perfusion.0.5.Bevacizumab\_human\_sim.5-Bevacizumab\_human\_sim-Measurement

## Chapter 4

# Sim\_Patient\_1mg/kg

### 4.1 Used building blocks

| Building Block | Name                                              |
|----------------|---------------------------------------------------|
| Individual     | Patient1 (see section 1.3 in Part I)              |
| Compound       | Bevacizumab (see section 2.2 in Part I)           |
| Protocol       | Infusion 1mg/kg human (see section 3.6 in Part I) |

**Table 4.1:** Building Block

### 4.2 Simulation Properties

#### 4.2.1 Model Structure

Allow aging

No

#### Calculation methods

| Category                  | Calculation methods   |
|---------------------------|-----------------------|
| Endothelial surface areas | Organ vascularization |
| Body surface area         | Mosteller             |

**Table 4.2:** Calculation methods

#### 4.2.2 Compounds

##### 4.2.2.1 Bevacizumab

#### Compound Configuration

| Parameter                                  | Alternative in compound | Value   | Unit      |
|--------------------------------------------|-------------------------|---------|-----------|
| Solubility                                 | Measurement             | 9999.00 | mg/l      |
| Lipophilicity                              | Measurement             | −5.00   | Log Units |
| Fraction unbound (plasma, reference value) | Measurement             | 1.00    |           |
| <i>continued on next page</i>              |                         |         |           |

| <i>continued from previous page</i> |                         |       |        |
|-------------------------------------|-------------------------|-------|--------|
| Parameter                           | Alternative in compound | Value | Unit   |
| Specific organ permeability         | Calculated              | 0     | cm/min |
| Specific intestinal permeability    | Calculated              | 0     | cm/min |

**Table 4.3:** Compound Configuration**Calculation methods**

| Category                | Calculation methods |
|-------------------------|---------------------|
| Partition coefficients  | PK-Sim Standard     |
| Cellular permeabilities | PK-Sim Standard     |

**Table 4.4:** Calculation methods**4.2.3 Processes****4.2.3.1 Bevacizumab****Specific Binding**

Mapping VEGFA with VEGFA-Paper

**4.2.4 Administration****4.2.4.1 Bevacizumab****Schema Item 1**

Intravenous Infusion

Start time: 0 h

Dose: 1.00 mg/kg

Infusion time: 90.00 min

**Schema Item 1**

Intravenous Infusion

Start time: 0 h

Dose: 1.00 mg/kg

Infusion time: 60.00 min

**Schema Item 1**

Intravenous Infusion

Start time: 0 h

Dose: 1.00 mg/kg

Infusion time: 60.00 min

**Schema Item 1**

Intravenous Infusion

Start time: 0 h

Dose: 1.00 mg/kg

Infusion time: 60.00 min

## 4.3 Charts

### 4.3.1 Time Profile Analysis

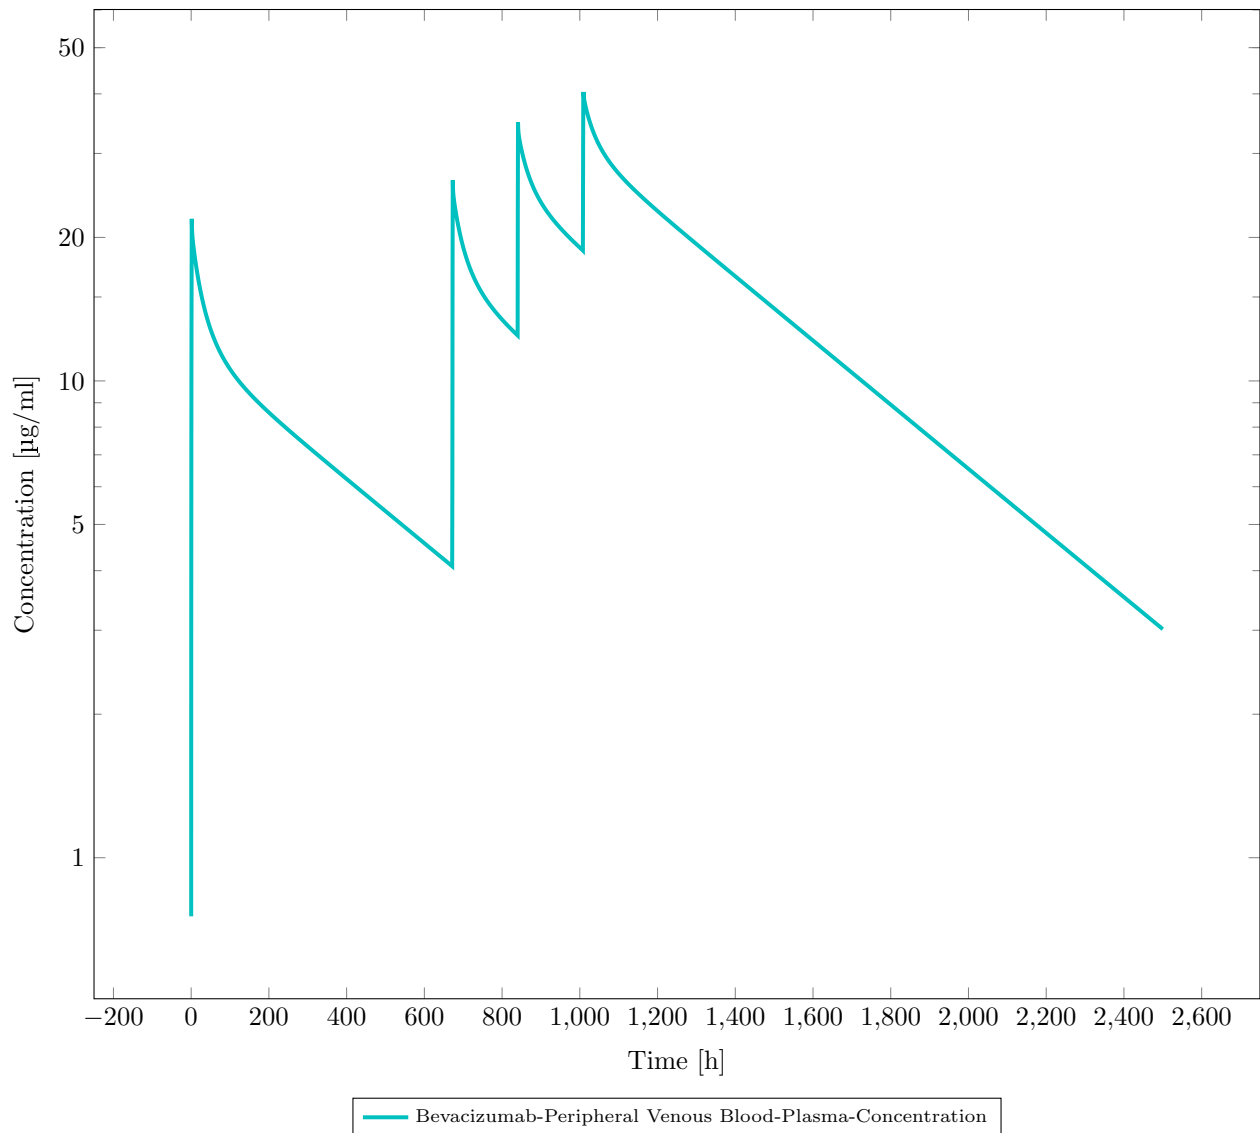

**Figure 4.1**

#### 4.3.1.1 PK-Analyses

##### Becavizumab-Peripheral Venous Blood-Plasma-Concentration

| Parameter                         | Value              | Unit   |
|-----------------------------------|--------------------|--------|
| C <sub>max</sub>                  | 0.27               | µmol/l |
| C <sub>max_norm</sub>             | $1.01 \times 10^7$ | mg/l   |
| C <sub>max_tD1-tD2</sub>          | 0.15               | µmol/l |
| C <sub>max_tD1-tD2_norm</sub>     | $2.19 \times 10^7$ | mg/l   |
| C <sub>max_tDlast-tEnd</sub>      | 0.27               | µmol/l |
| C <sub>max_tDLast-tEnd_norm</sub> | $4.04 \times 10^7$ | mg/l   |
| t <sub>max</sub>                  | 1009.40            | h      |
| t <sub>max_tD1-tD2</sub>          | 1.50               | h      |

*continued on next page*



| continued from previous page |                       |            |
|------------------------------|-----------------------|------------|
| Parameter                    | Value                 | Unit       |
| t_max.tDlast-tEnd            | 1009.40               | h          |
| C_trough.tD2                 | 0.04                  | μmol/l     |
| C_trough.tDlast              | 0.02                  | μmol/l     |
| AUC.tD1-tD2                  | 2060.15               | μmol*min/l |
| AUC.tD1-tD2_norm             | $3.09 \times 10^{14}$ | μg*min/l   |
| AUC.tDlast-1.tDlast          | 1556.16               | μmol*min/l |
| AUC.tDlast-1.tDlast_norm     | $2.33 \times 10^{14}$ | μg*min/l   |
| AUC_inf.tD1                  | 0                     | μmol*min/l |
| AUC_inf.tD1_norm             | 0                     | μg*min/l   |
| AUC_inf.tDlast               | 7984.57               | μmol*min/l |
| AUC_inf.tDlast_norm          | $1.20 \times 10^{15}$ | μg*min/l   |
| MRT                          | NaN                   | h          |
| Half-Life                    | -0.77                 | h          |
| Half-Life.tDlast-tEnd        | 448.10                | h          |

**Table 4.5:** PK-Analyses for Bevacizumab-Peripheral Venous Blood-Plasma-Concentration**Beva\_Gordon2001\_patients\_1mpk..Human.iv perfusion.1.Bevacizumab-Bevacizumab-Measurement**

| Parameter              | Value                 | Unit       |
|------------------------|-----------------------|------------|
| C_max                  | 0.30                  | μmol/l     |
| C_max_norm             | $1.14 \times 10^7$    | mg/l       |
| t_max                  | 1006.87               | h          |
| C.tEnd                 | 0.06                  | μmol/l     |
| AUC.tEnd               | 10839.74              | μmol*min/l |
| AUC.tEnd_norm          | $4.06 \times 10^{14}$ | μg*min/l   |
| AUC_inf                | NaN                   | μmol*min/l |
| AUC_inf_norm           | NaN                   | μg*min/l   |
| MRT                    | NaN                   | h          |
| Half-Life              | Infinity              | h          |
| % AUC (tlast-∞)        | NaN                   |            |
| Total body clearance/F | NaN                   | ml/min/kg  |
| Vss (plasma)/F         | NaN                   | ml/kg      |
| Vd (plasma)/F          | NaN                   | ml/kg      |

**Table 4.6:** PK-Analyses for Beva\_Gordon2001\_patients\_1mpk..Human.iv perfusion.1.Bevacizumab-Bevacizumab-Measurement

## Chapter 5

# Sim\_Patient\_3mg/kg

### 5.1 Used building blocks

| Building Block | Name                                              |
|----------------|---------------------------------------------------|
| Individual     | Patient1 (see section 1.3 in Part I)              |
| Compound       | Bevacizumab (see section 2.2 in Part I)           |
| Protocol       | Infusion 3mg/kg human (see section 3.7 in Part I) |

**Table 5.1:** Building Block

### 5.2 Simulation Properties

#### 5.2.1 Model Structure

Allow aging

No

#### Calculation methods

| Category                  | Calculation methods   |
|---------------------------|-----------------------|
| Endothelial surface areas | Organ vascularization |
| Body surface area         | Mosteller             |

**Table 5.2:** Calculation methods

#### 5.2.2 Compounds

##### 5.2.2.1 Bevacizumab

#### Compound Configuration

| Parameter                                  | Alternative in compound | Value   | Unit      |
|--------------------------------------------|-------------------------|---------|-----------|
| Solubility                                 | Measurement             | 9999.00 | mg/l      |
| Lipophilicity                              | Measurement             | −5.00   | Log Units |
| Fraction unbound (plasma, reference value) | Measurement             | 1.00    |           |
| <i>continued on next page</i>              |                         |         |           |

| continued from previous page     |                         |       |        |
|----------------------------------|-------------------------|-------|--------|
| Parameter                        | Alternative in compound | Value | Unit   |
| Specific organ permeability      | Calculated              | 0     | cm/min |
| Specific intestinal permeability | Calculated              | 0     | cm/min |

**Table 5.3:** Compound Configuration**Calculation methods**

| Category                | Calculation methods |
|-------------------------|---------------------|
| Partition coefficients  | PK-Sim Standard     |
| Cellular permeabilities | PK-Sim Standard     |

**Table 5.4:** Calculation methods**5.2.3 Processes****5.2.3.1 Bevacizumab****Specific Binding**

Mapping VEGFA with VEGFA-Paper

**5.2.4 Administration****5.2.4.1 Bevacizumab****Schema Item 1**

Intravenous Infusion

Start time: 0 h

Dose: 3.00 mg/kg

Infusion time: 60.00 min

**Schema Item 1**

Intravenous Infusion

Start time: 0 h

Dose: 3.00 mg/kg

Infusion time: 60.00 min

**Schema Item 1**

Intravenous Infusion

Start time: 0 h

Dose: 3.00 mg/kg

Infusion time: 60.00 min

**Schema Item 1**

Intravenous Infusion

Start time: 0 h

Dose: 3.00 mg/kg

Infusion time: 60.00 min

## 5.3 Charts

### 5.3.1 Time Profile Analysis

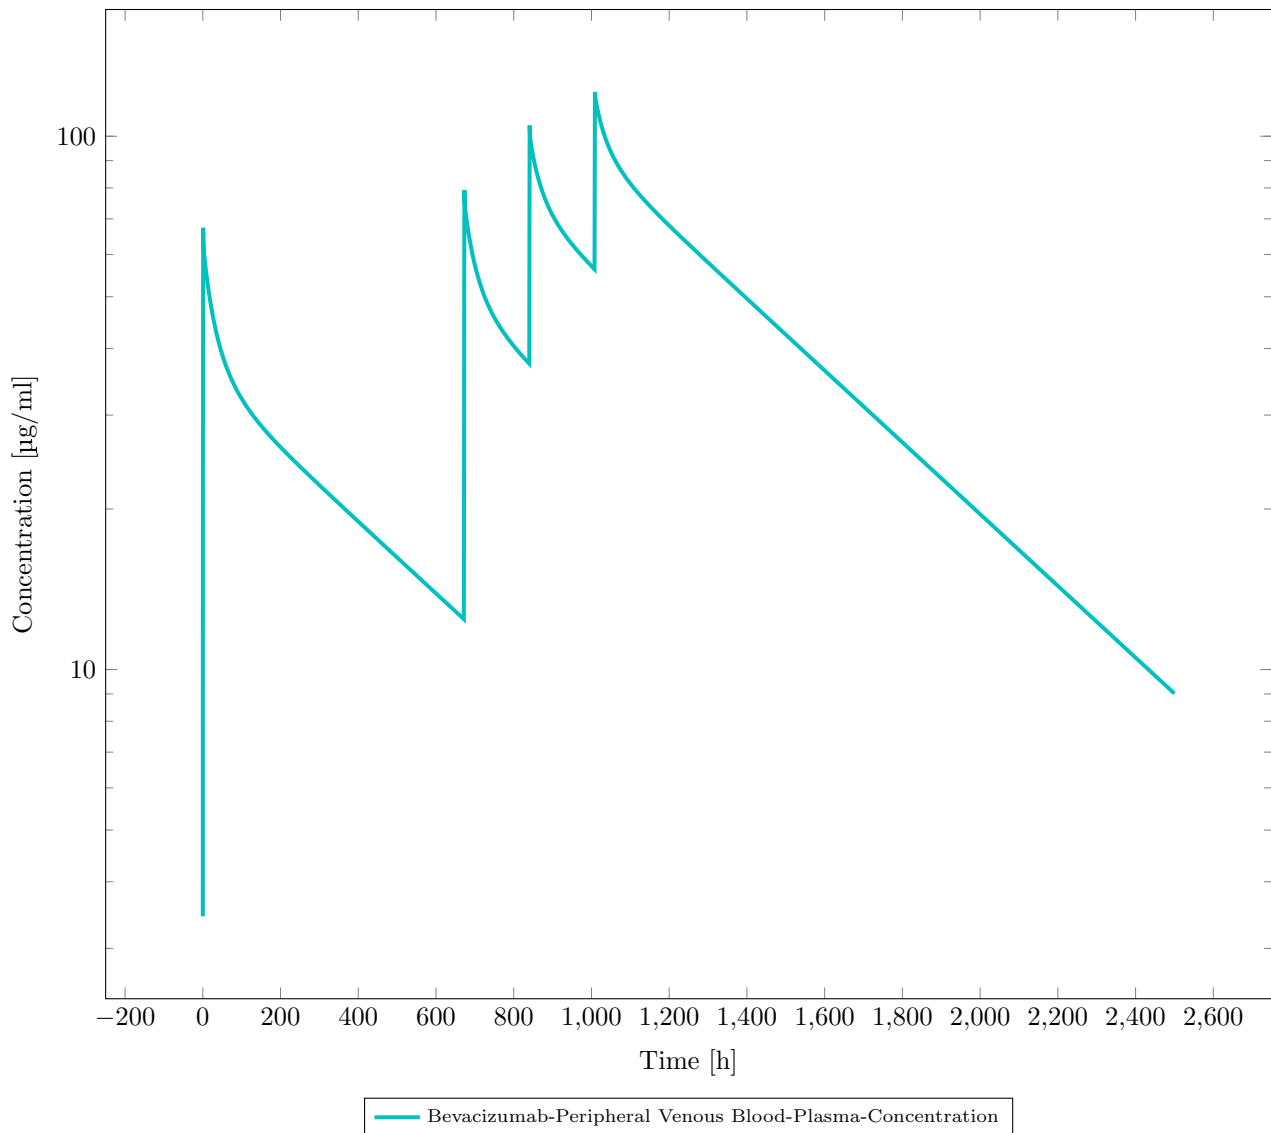

**Figure 5.1**

#### 5.3.1.1 PK-Analyses

##### Bevacizumab-Peripheral Venous Blood-Plasma-Concentration

| Parameter                         | Value              | Unit   |
|-----------------------------------|--------------------|--------|
| C <sub>max</sub>                  | 0.81               | µmol/l |
| C <sub>max_norm</sub>             | $1.01 \times 10^7$ | mg/l   |
| C <sub>max_tD1-tD2</sub>          | 0.45               | µmol/l |
| C <sub>max_tD1-tD2_norm</sub>     | $2.25 \times 10^7$ | mg/l   |
| C <sub>max_tDlast-tEnd</sub>      | 0.81               | µmol/l |
| C <sub>max_tDLast-tEnd_norm</sub> | $4.04 \times 10^7$ | mg/l   |
| t <sub>max</sub>                  | 1009.40            | h      |
| t <sub>max_tD1-tD2</sub>          | 1.00               | h      |

*continued on next page*

| continued from previous page |                       |            |
|------------------------------|-----------------------|------------|
| Parameter                    | Value                 | Unit       |
| t_max_tDlast-tEnd            | 1009.40               | h          |
| C_trough_tD2                 | 0.13                  | μmol/l     |
| C_trough_tDlast              | 0.06                  | μmol/l     |
| AUC_tD1-tD2                  | 6267.91               | μmol*min/l |
| AUC_tD1-tD2_norm             | $3.13 \times 10^{14}$ | μg*min/l   |
| AUC_tDlast-1_tDlast          | 4667.69               | μmol*min/l |
| AUC_tDlast-1_tDlast_norm     | $2.33 \times 10^{14}$ | μg*min/l   |
| AUC_inf_tD1                  | 0                     | μmol*min/l |
| AUC_inf_tD1_norm             | 0                     | μg*min/l   |
| AUC_inf_tDLast               | 23890.55              | μmol*min/l |
| AUC_inf_tDLast_norm          | $1.19 \times 10^{15}$ | μg*min/l   |
| MRT                          | NaN                   | h          |
| Half-Life                    | -0.77                 | h          |
| Half-Life_tDlast-tEnd        | 447.50                | h          |

**Table 5.5:** PK-Analyses for Bevacizumab-Peripheral Venous Blood-Plasma-Concentration**Beva\_Gordon2001\_patients\_3mpk..Human.iv perfusion.3.Bevacizumab-Bevacizumab-Measurement**

| Parameter              | Value                 | Unit       |
|------------------------|-----------------------|------------|
| C_max                  | 1.14                  | μmol/l     |
| C_max_norm             | $1.42 \times 10^7$    | mg/l       |
| t_max                  | 1008.57               | h          |
| C_tEnd                 | 0.14                  | μmol/l     |
| AUC_tEnd               | 34293.29              | μmol*min/l |
| AUC_tEnd_norm          | $4.29 \times 10^{14}$ | μg*min/l   |
| AUC_inf                | NaN                   | μmol*min/l |
| AUC_inf_norm           | NaN                   | μg*min/l   |
| MRT                    | NaN                   | h          |
| Half-Life              | Infinity              | h          |
| % AUC (tlast-∞)        | NaN                   |            |
| Total body clearance/F | NaN                   | ml/min/kg  |
| Vss (plasma)/F         | NaN                   | ml/kg      |
| Vd (plasma)/F          | NaN                   | ml/kg      |

**Table 5.6:** PK-Analyses for Beva\_Gordon2001\_patients\_3mpk..Human.iv perfusion.3.Bevacizumab-Bevacizumab-Measurement

# Chapter 6

## Sim\_Patient\_10mg/kg

### 6.1 Used building blocks

| Building Block | Name                                               |
|----------------|----------------------------------------------------|
| Individual     | Patient1 (see section 1.3 in Part I)               |
| Compound       | Bevacizumab (see section 2.2 in Part I)            |
| Protocol       | Infusion 10mg/kg human (see section 3.5 in Part I) |

Table 6.1: Building Block

### 6.2 Simulation Properties

#### 6.2.1 Model Structure

Allow aging

No

#### Calculation methods

| Category                  | Calculation methods   |
|---------------------------|-----------------------|
| Endothelial surface areas | Organ vascularization |
| Body surface area         | Mosteller             |

Table 6.2: Calculation methods

#### 6.2.2 Compounds

##### 6.2.2.1 Bevacizumab

#### Compound Configuration

| Parameter                                  | Alternative in compound | Value   | Unit      |
|--------------------------------------------|-------------------------|---------|-----------|
| Solubility                                 | Measurement             | 9999.00 | mg/l      |
| Lipophilicity                              | Measurement             | −5.00   | Log Units |
| Fraction unbound (plasma, reference value) | Measurement             | 1.00    |           |
| continued on next page                     |                         |         |           |

| continued from previous page     |                         |       |        |
|----------------------------------|-------------------------|-------|--------|
| Parameter                        | Alternative in compound | Value | Unit   |
| Specific organ permeability      | Calculated              | 0     | cm/min |
| Specific intestinal permeability | Calculated              | 0     | cm/min |

**Table 6.3:** Compound Configuration**Calculation methods**

| Category                | Calculation methods |
|-------------------------|---------------------|
| Partition coefficients  | PK-Sim Standard     |
| Cellular permeabilities | PK-Sim Standard     |

**Table 6.4:** Calculation methods**6.2.3 Processes****6.2.3.1 Bevacizumab****Specific Binding**

Mapping VEGFA with VEGFA-Paper

**6.2.4 Administration****6.2.4.1 Bevacizumab****Schema Item 1**

Intravenous Infusion

Start time: 0 h

Dose: 10.00 mg/kg

Infusion time: 90.00 min

**Schema Item 1**

Intravenous Infusion

Start time: 0 h

Dose: 10.00 mg/kg

Infusion time: 60.00 min

**Schema Item 1**

Intravenous Infusion

Start time: 0 h

Dose: 10.00 mg/kg

Infusion time: 60.00 min

**Schema Item 1**

Intravenous Infusion

Start time: 0 h

Dose: 10.00 mg/kg

Infusion time: 60.00 min

## 6.3 Charts

### 6.3.1 Time Profile Analysis

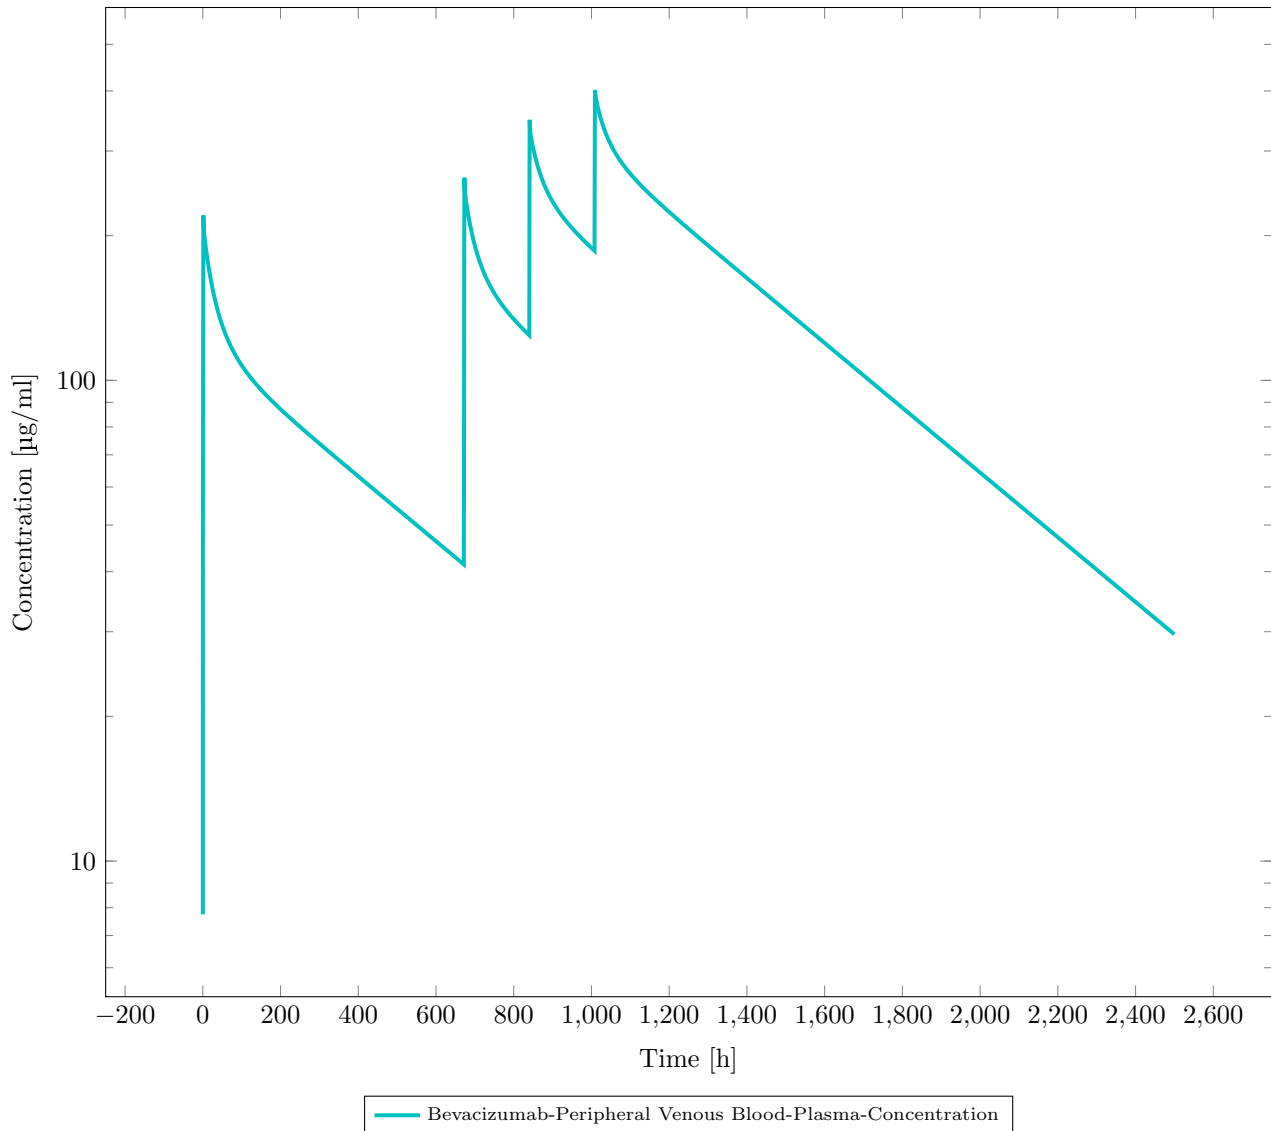

**Figure 6.1**

#### 6.3.1.1 PK-Analyses

##### Bevacizumab-Peripheral Venous Blood-Plasma-Concentration

| Parameter                         | Value              | Unit   |
|-----------------------------------|--------------------|--------|
| C <sub>max</sub>                  | 2.68               | µmol/l |
| C <sub>max_norm</sub>             | $1.00 \times 10^7$ | mg/l   |
| C <sub>max_tD1-tD2</sub>          | 1.47               | µmol/l |
| C <sub>max_tD1-tD2_norm</sub>     | $2.20 \times 10^7$ | mg/l   |
| C <sub>max_tDlast-tEnd</sub>      | 2.68               | µmol/l |
| C <sub>max_tDLast-tEnd_norm</sub> | $4.02 \times 10^7$ | mg/l   |
| t <sub>max</sub>                  | 1009.40            | h      |
| t <sub>max_tD1-tD2</sub>          | 1.50               | h      |

*continued on next page*



| continued from previous page |                       |            |
|------------------------------|-----------------------|------------|
| Parameter                    | Value                 | Unit       |
| t_max_tDlast-tEnd            | 1009.40               | h          |
| C_trough_tD2                 | 0.43                  | μmol/l     |
| C_trough_tDlast              | 0.20                  | μmol/l     |
| AUC_tD1-tD2                  | 20891.18              | μmol*min/l |
| AUC_tD1-tD2_norm             | $3.13 \times 10^{14}$ | μg*min/l   |
| AUC_tDlast-1_tDlast          | 15454.22              | μmol*min/l |
| AUC_tDlast-1_tDlast_norm     | $2.32 \times 10^{14}$ | μg*min/l   |
| AUC_inf_tD1                  | 0                     | μmol*min/l |
| AUC_inf_tD1_norm             | 0                     | μg*min/l   |
| AUC_inf_tDLast               | 78648.48              | μmol*min/l |
| AUC_inf_tDLast_norm          | $1.18 \times 10^{15}$ | μg*min/l   |
| MRT                          | NaN                   | h          |
| Half-Life                    | -0.77                 | h          |
| Half-Life_tDlast-tEnd        | 447.26                | h          |

**Table 6.5:** PK-Analyses for Bevacizumab-Peripheral Venous Blood-Plasma-Concentration**Beva\_Gordon2001\_patients\_10mpk..Human.iv perfusion.10.Bevacizumab-Bevacizumab-Measurement**

| Parameter              | Value                 | Unit       |
|------------------------|-----------------------|------------|
| C_max                  | 2.85                  | μmol/l     |
| C_max_norm             | $1.07 \times 10^7$    | mg/l       |
| t_max                  | 1006.87               | h          |
| C_tEnd                 | 0.61                  | μmol/l     |
| AUC_tEnd               | 111357.59             | μmol*min/l |
| AUC_tEnd_norm          | $4.18 \times 10^{14}$ | μg*min/l   |
| AUC_inf                | NaN                   | μmol*min/l |
| AUC_inf_norm           | NaN                   | μg*min/l   |
| MRT                    | NaN                   | h          |
| Half-Life              | Infinity              | h          |
| % AUC (tlast-∞)        | NaN                   |            |
| Total body clearance/F | NaN                   | ml/min/kg  |
| Vss (plasma)/F         | NaN                   | ml/kg      |
| Vd (plasma)/F          | NaN                   | ml/kg      |

**Table 6.6:** PK-Analyses for Beva\_Gordon2001\_patients\_10mpk..Human.iv perfusion.10.Bevacizumab-Bevacizumab-Measurement

# Chapter 7

## Sim\_Patient\_5mg/kg

### 7.1 Used building blocks

| Building Block | Name                                         |
|----------------|----------------------------------------------|
| Individual     | Patient1 (see section 1.3 in Part I)         |
| Compound       | Bevacizumab (see section 2.2 in Part I)      |
| Protocol       | 5mpk_every2weeks (see section 3.8 in Part I) |

**Table 7.1:** Building Block

### 7.2 Simulation Properties

#### 7.2.1 Model Structure

Allow aging

No

#### Calculation methods

| Category                  | Calculation methods   |
|---------------------------|-----------------------|
| Endothelial surface areas | Organ vascularization |
| Body surface area         | Mosteller             |

**Table 7.2:** Calculation methods

#### 7.2.2 Compounds

##### 7.2.2.1 Bevacizumab

#### Compound Configuration

| Parameter                                  | Alternative in compound | Value   | Unit      |
|--------------------------------------------|-------------------------|---------|-----------|
| Solubility                                 | Measurement             | 9999.00 | mg/l      |
| Lipophilicity                              | Measurement             | −5.00   | Log Units |
| Fraction unbound (plasma, reference value) | Measurement             | 1.00    |           |
| <i>continued on next page</i>              |                         |         |           |

| <i>continued from previous page</i> |                         |       |        |
|-------------------------------------|-------------------------|-------|--------|
| Parameter                           | Alternative in compound | Value | Unit   |
| Specific organ permeability         | Calculated              | 0     | cm/min |
| Specific intestinal permeability    | Calculated              | 0     | cm/min |

**Table 7.3:** Compound Configuration**Calculation methods**

| Category                | Calculation methods |
|-------------------------|---------------------|
| Partition coefficients  | PK-Sim Standard     |
| Cellular permeabilities | PK-Sim Standard     |

**Table 7.4:** Calculation methods**7.2.3 Processes****7.2.3.1 Bevacizumab****Specific Binding**

Mapping VEGFA with VEGFA-Paper

**7.2.4 Administration****7.2.4.1 Bevacizumab****Schema Item 1**

Intravenous Infusion

Start time: 0 h

Dose: 5.00 mg/kg

Infusion time: 60.00 min

**7.3 Charts**

### 7.3.1 Time Profile Analysis

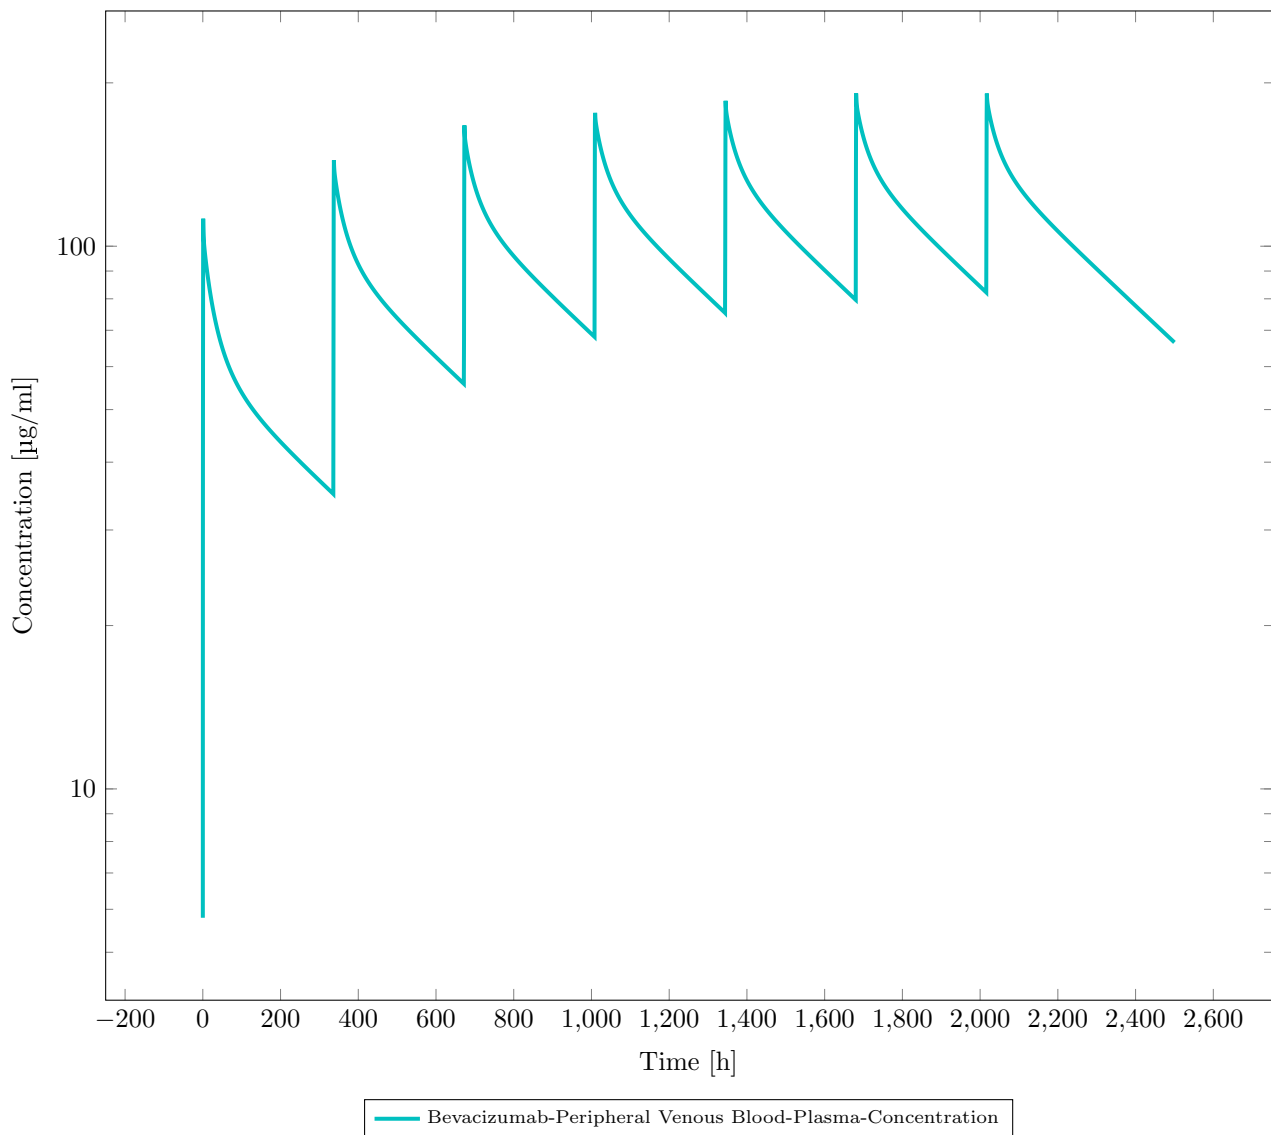

**Figure 7.1**

#### 7.3.1.1 PK-Analyses

##### Bevacizumab-Peripheral Venous Blood-Plasma-Concentration

| Parameter                         | Value              | Unit   |
|-----------------------------------|--------------------|--------|
| C <sub>max</sub>                  | 1.28               | µmol/l |
| C <sub>max_norm</sub>             | $5.46 \times 10^6$ | mg/l   |
| C <sub>max_tD1-tD2</sub>          | 0.75               | µmol/l |
| C <sub>max_tD1-tD2_norm</sub>     | $2.25 \times 10^7$ | mg/l   |
| C <sub>max_tDlast-tEnd</sub>      | 1.27               | µmol/l |
| C <sub>max_tDLast-tEnd_norm</sub> | $3.82 \times 10^7$ | mg/l   |
| t <sub>max</sub>                  | 1680.99            | h      |
| t <sub>max_tD1-tD2</sub>          | 1.00               | h      |
| t <sub>max_tDlast-tEnd</sub>      | 2017.29            | h      |

*continued on next page*

| continued from previous page |                       |                       |
|------------------------------|-----------------------|-----------------------|
| Parameter                    | Value                 | Unit                  |
| C_trough_tD2                 | 0.47                  | $\mu\text{mol/l}$     |
| C_trough_tDlast              | 0.44                  | $\mu\text{mol/l}$     |
| AUC_tD1-tD2                  | 6810.80               | $\mu\text{mol*min/l}$ |
| AUC_tD1-tD2_norm             | $2.04 \times 10^{14}$ | $\mu\text{g*min/l}$   |
| AUC_tDlast-1_tDlast          | 15137.61              | $\mu\text{mol*min/l}$ |
| AUC_tDlast-1_tDlast_norm     | $4.54 \times 10^{14}$ | $\mu\text{g*min/l}$   |
| AUC_inf_tD1                  | 0                     | $\mu\text{mol*min/l}$ |
| AUC_inf_tD1_norm             | 0                     | $\mu\text{g*min/l}$   |
| AUC_inf_tDlast               | 36960.51              | $\mu\text{mol*min/l}$ |
| AUC_inf_tDlast_norm          | $1.11 \times 10^{15}$ | $\mu\text{g*min/l}$   |
| MRT                          | NaN                   | h                     |
| Half-Life                    | -0.50                 | h                     |
| Half-Life_tDlast-tEnd        | 446.60                | h                     |

**Table 7.5:** PK-Analyses for Bevacizumab-Peripheral Venous Blood-Plasma-Concentration**Beva\_Romera2018\_patients\_5mpk..Human.iv perfusion.5.Bevacizumab-Bevacizumab-Measurement**

| Parameter                | Value                 | Unit                  |
|--------------------------|-----------------------|-----------------------|
| C_max                    | 1.27                  | $\mu\text{mol/l}$     |
| C_max_norm               | $5.44 \times 10^6$    | mg/l                  |
| t_max                    | 2022.79               | h                     |
| C_tEnd                   | 0.52                  | $\mu\text{mol/l}$     |
| AUC_tEnd                 | 90708.27              | $\mu\text{mol*min/l}$ |
| AUC_tEnd_norm            | $3.89 \times 10^{14}$ | $\mu\text{g*min/l}$   |
| AUC_inf                  | 107670.11             | $\mu\text{mol*min/l}$ |
| AUC_inf_norm             | $4.61 \times 10^{14}$ | $\mu\text{g*min/l}$   |
| MRT                      | 1897.54               | h                     |
| Half-Life                | 376.53                | h                     |
| % AUC (tlast- $\infty$ ) | 0.16                  |                       |
| Total body clearance/F   | $2.17 \times 10^{-3}$ | ml/min/kg             |
| Vss (plasma)/F           | 246.73                | ml/kg                 |
| Vd (plasma)/F            | 70.63                 | ml/kg                 |

**Table 7.6:** PK-Analyses for Beva\_Romera2018\_patients\_5mpk..Human.iv perfusion.5.Bevacizumab-Bevacizumab-Measurement

## Chapter 8

# Sim\_Patient\_0.3mg/kg

### 8.1 Used building blocks

| Building Block | Name                                                |
|----------------|-----------------------------------------------------|
| Individual     | Patient1 (see section 1.3 in Part I)                |
| Compound       | Bevacizumab (see section 2.2 in Part I)             |
| Protocol       | Infusion 0.3mg/kg human (see section 3.4 in Part I) |

**Table 8.1:** Building Block

### 8.2 Simulation Properties

#### 8.2.1 Model Structure

Allow aging

No

#### Calculation methods

| Category                  | Calculation methods   |
|---------------------------|-----------------------|
| Endothelial surface areas | Organ vascularization |
| Body surface area         | Mosteller             |

**Table 8.2:** Calculation methods

#### 8.2.2 Compounds

##### 8.2.2.1 Bevacizumab

#### Compound Configuration

| Parameter                                  | Alternative in compound | Value   | Unit      |
|--------------------------------------------|-------------------------|---------|-----------|
| Solubility                                 | Measurement             | 9999.00 | mg/l      |
| Lipophilicity                              | Measurement             | −5.00   | Log Units |
| Fraction unbound (plasma, reference value) | Measurement             | 1.00    |           |
| <i>continued on next page</i>              |                         |         |           |

| continued from previous page     |                         |       |        |
|----------------------------------|-------------------------|-------|--------|
| Parameter                        | Alternative in compound | Value | Unit   |
| Specific organ permeability      | Calculated              | 0     | cm/min |
| Specific intestinal permeability | Calculated              | 0     | cm/min |

**Table 8.3:** Compound Configuration**Calculation methods**

| Category                | Calculation methods |
|-------------------------|---------------------|
| Partition coefficients  | PK-Sim Standard     |
| Cellular permeabilities | PK-Sim Standard     |

**Table 8.4:** Calculation methods**8.2.3 Processes****8.2.3.1 Bevacizumab****Specific Binding**

Mapping VEGFA with VEGFA-Paper

**8.2.4 Administration****8.2.4.1 Bevacizumab****Schema Item 1**

Intravenous Infusion

Start time: 0 h

Dose: 0.30 mg/kg

Infusion time: 90.00 min

**Schema Item 1**

Intravenous Infusion

Start time: 0 h

Dose: 0.30 mg/kg

Infusion time: 60.00 min

**Schema Item 1**

Intravenous Infusion

Start time: 0 h

Dose: 0.30 mg/kg

Infusion time: 60.00 min

**Schema Item 1**

Intravenous Infusion

Start time: 0 h

Dose: 0.30 mg/kg

Infusion time: 60.00 min

## 8.3 Charts

### 8.3.1 Time Profile Analysis

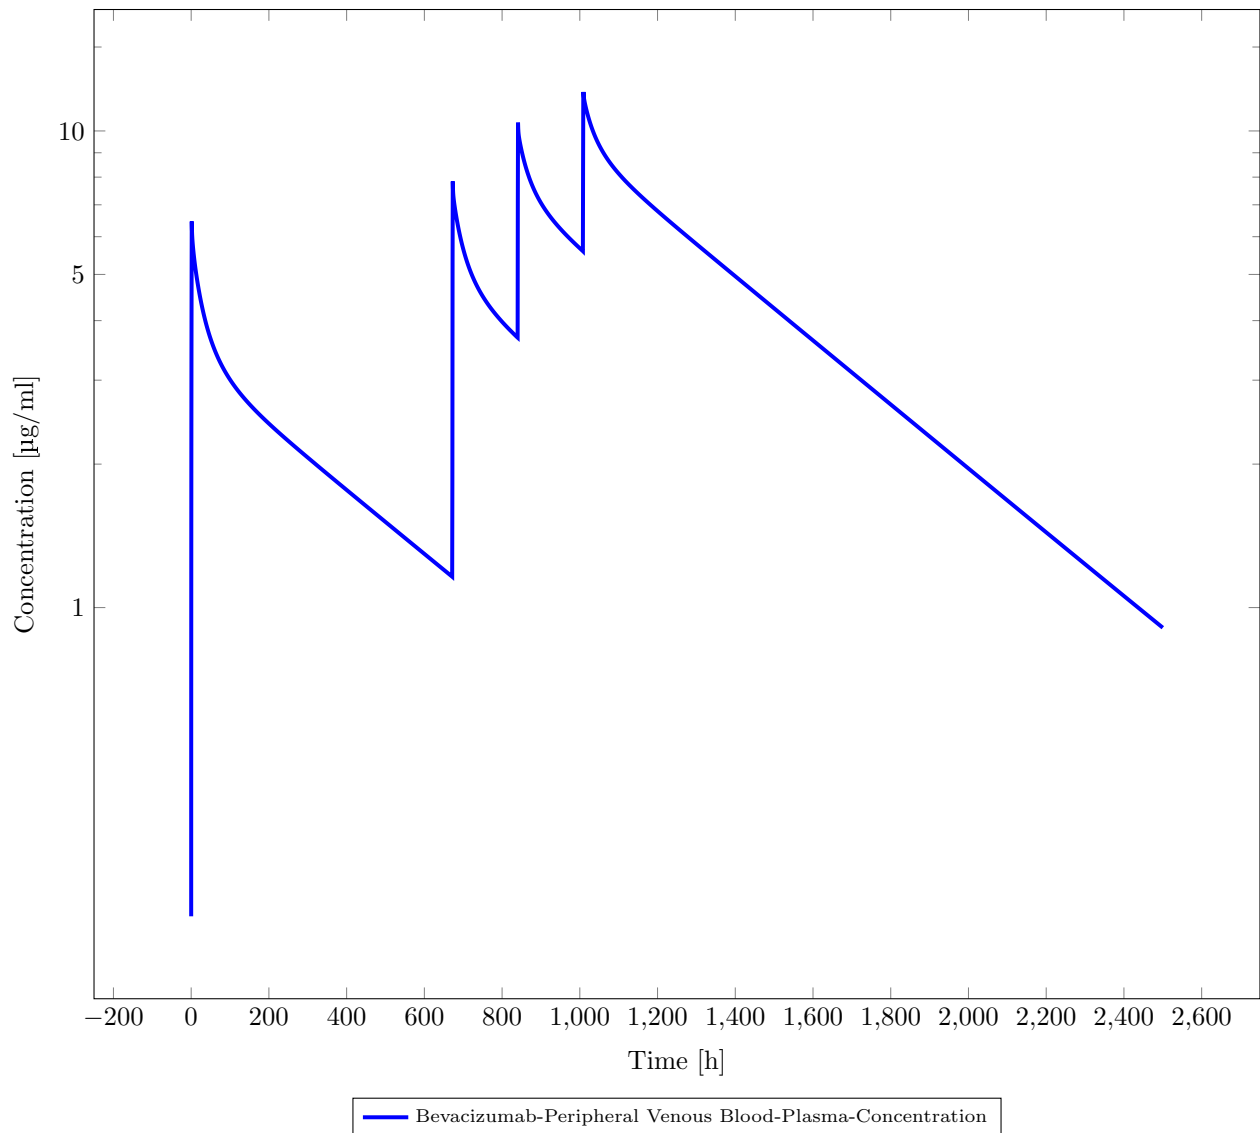

**Figure 8.1**

#### 8.3.1.1 PK-Analyses

##### Bevacizumab-Peripheral Venous Blood-Plasma-Concentration

| Parameter                         | Value              | Unit   |
|-----------------------------------|--------------------|--------|
| C <sub>max</sub>                  | 0.08               | µmol/l |
| C <sub>max_norm</sub>             | $1.01 \times 10^7$ | mg/l   |
| C <sub>max_tD1-tD2</sub>          | 0.04               | µmol/l |
| C <sub>max_tD1-tD2_norm</sub>     | $2.15 \times 10^7$ | mg/l   |
| C <sub>max_tDlast-tEnd</sub>      | 0.08               | µmol/l |
| C <sub>max_tDLast-tEnd_norm</sub> | $4.02 \times 10^7$ | mg/l   |
| t <sub>max</sub>                  | 1009.40            | h      |
| t <sub>max_tD1-tD2</sub>          | 1.50               | h      |

*continued on next page*



| continued from previous page |                       |            |
|------------------------------|-----------------------|------------|
| Parameter                    | Value                 | Unit       |
| t_max_tDlast-tEnd            | 1009.40               | h          |
| C_trough_tD2                 | 0.01                  | μmol/l     |
| C_trough_tDlast              | $6.05 \times 10^{-3}$ | μmol/l     |
| AUC_tD1-tD2                  | 585.81                | μmol*min/l |
| AUC_tD1-tD2_norm             | $2.93 \times 10^{14}$ | μg*min/l   |
| AUC_tDlast-1_tDlast          | 463.83                | μmol*min/l |
| AUC_tDlast-1_tDlast_norm     | $2.32 \times 10^{14}$ | μg*min/l   |
| AUC_inf_tD1                  | 0                     | μmol*min/l |
| AUC_inf_tD1_norm             | 0                     | μg*min/l   |
| AUC_inf_tDLast               | 2392.41               | μmol*min/l |
| AUC_inf_tDLast_norm          | $1.20 \times 10^{15}$ | μg*min/l   |
| MRT                          | NaN                   | h          |
| Half-Life                    | -0.73                 | h          |
| Half-Life_tDlast-tEnd        | 453.27                | h          |

**Table 8.5:** PK-Analyses for Bevacizumab-Peripheral Venous Blood-Plasma-Concentration**Beva\_Gordon2001\_patients\_0.3mpk..Human.iv perfusion.0.3.Bevacizumab-Bevacizumab-Measurement**

| Parameter              | Value                 | Unit       |
|------------------------|-----------------------|------------|
| C_max                  | 0.07                  | μmol/l     |
| C_max_norm             | $8.38 \times 10^6$    | mg/l       |
| t_max                  | 1008.57               | h          |
| C_tEnd                 | $3.12 \times 10^{-3}$ | μmol/l     |
| AUC_tEnd               | 2314.57               | μmol*min/l |
| AUC_tEnd_norm          | $2.89 \times 10^{14}$ | μg*min/l   |
| AUC_inf                | NaN                   | μmol*min/l |
| AUC_inf_norm           | NaN                   | μg*min/l   |
| MRT                    | NaN                   | h          |
| Half-Life              | Infinity              | h          |
| % AUC (tlast-∞)        | NaN                   |            |
| Total body clearance/F | NaN                   | ml/min/kg  |
| Vss (plasma)/F         | NaN                   | ml/kg      |
| Vd (plasma)/F          | NaN                   | ml/kg      |

**Table 8.6:** PK-Analyses for Beva\_Gordon2001\_patients\_0.3mpk..Human.iv perfusion.0.3.Bevacizumab-Bevacizumab-Measurement

## Chapter 9

# Sim\_patient\_ped\_5mg/kg

### 9.1 Used building blocks

| Building Block | Name                                        |
|----------------|---------------------------------------------|
| Individual     | Patient_ped (see section 1.4 in Part I)     |
| Compound       | Bevacizumab (see section 2.2 in Part I)     |
| Protocol       | Infusion_5mg/kg (see section 3.9 in Part I) |

**Table 9.1:** Building Block

### 9.2 Simulation Properties

#### 9.2.1 Model Structure

Allow aging

No

#### Calculation methods

| Category                  | Calculation methods   |
|---------------------------|-----------------------|
| Endothelial surface areas | Organ vascularization |
| Body surface area         | Mosteller             |

**Table 9.2:** Calculation methods

#### 9.2.2 Compounds

##### 9.2.2.1 Bevacizumab

#### Compound Configuration

| Parameter                                  | Alternative in compound | Value   | Unit      |
|--------------------------------------------|-------------------------|---------|-----------|
| Solubility                                 | Measurement             | 9999.00 | mg/l      |
| Lipophilicity                              | Measurement             | −5.00   | Log Units |
| Fraction unbound (plasma, reference value) | Measurement             | 1.00    |           |
| <i>continued on next page</i>              |                         |         |           |

| continued from previous page     |                         |       |        |
|----------------------------------|-------------------------|-------|--------|
| Parameter                        | Alternative in compound | Value | Unit   |
| Specific organ permeability      | Calculated              | 0     | cm/min |
| Specific intestinal permeability | Calculated              | 0     | cm/min |

**Table 9.3:** Compound Configuration**Calculation methods**

| Category                | Calculation methods |
|-------------------------|---------------------|
| Partition coefficients  | PK-Sim Standard     |
| Cellular permeabilities | PK-Sim Standard     |

**Table 9.4:** Calculation methods**9.2.3 Processes****9.2.3.1 Bevacizumab****Specific Binding**

Mapping VEGFA with VEGFA-Paper

**9.2.4 Administration****9.2.4.1 Bevacizumab****Simple protocol**

Intravenous Infusion

Dosing interval: Single

Dose: 5.00 mg/kg

Infusion time: 60.00 min

**9.3 Charts**

### 9.3.1 Time Profile Analysis

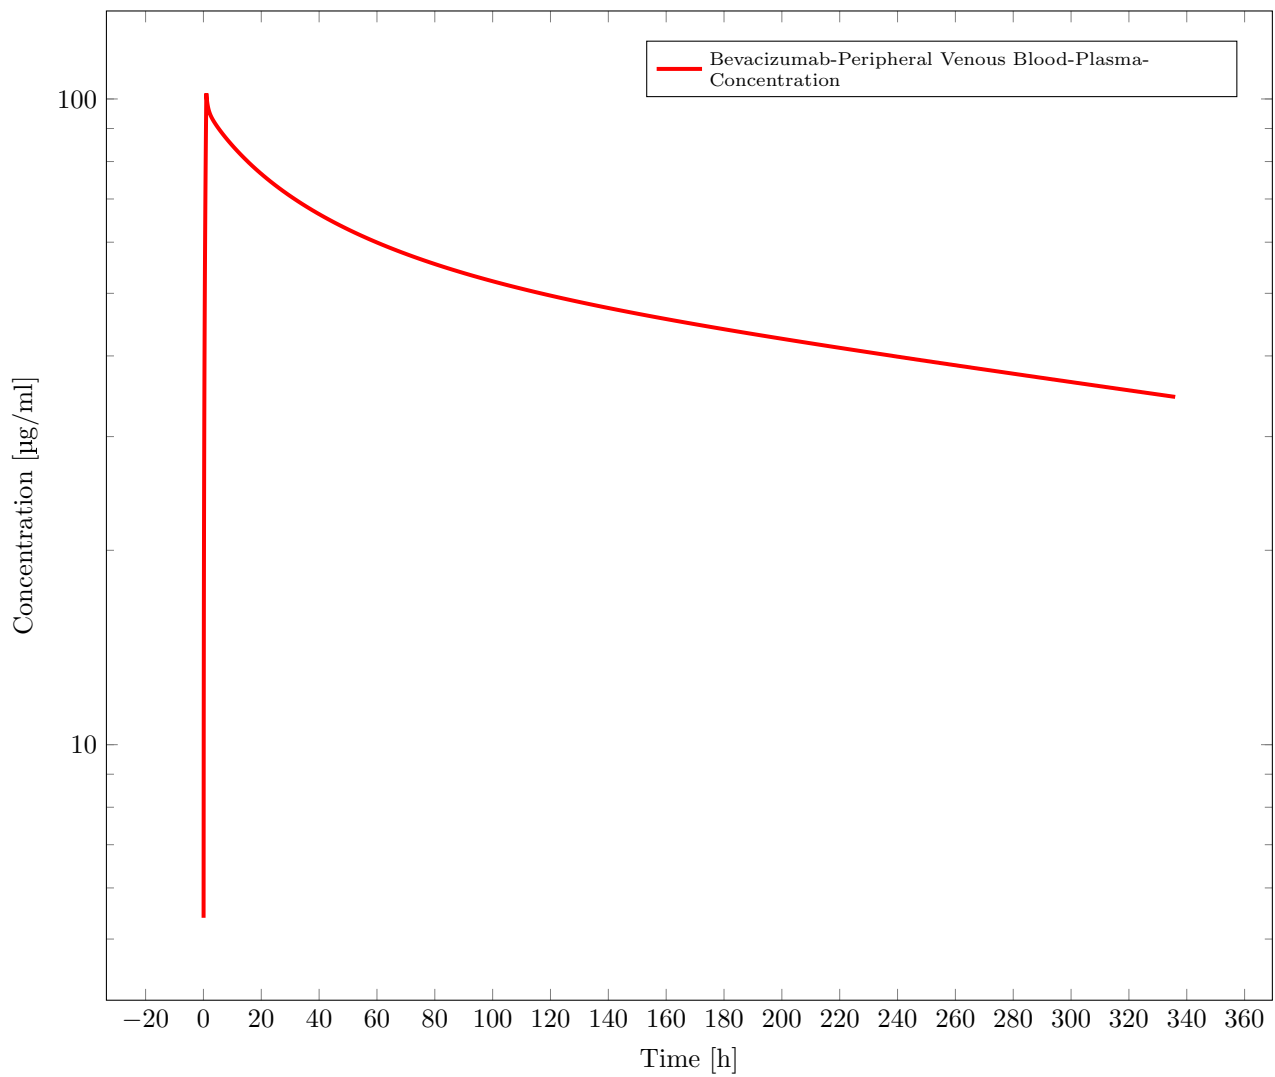

Figure 9.1

#### 9.3.1.1 Global PK-Analyses

| Parameter              | Compound    | Value                 | Unit      |
|------------------------|-------------|-----------------------|-----------|
| Vss (plasma)           | Bevacizumab | 82.20                 | ml/kg     |
| Vd (plasma)            | Bevacizumab | 85.17                 | ml/kg     |
| Vss (phys-chem)        | Bevacizumab | 650.79                | ml/kg     |
| Total plasma clearance | Bevacizumab | $2.08 \times 10^{-3}$ | ml/min/kg |

Table 9.5: Global PK-Analyses

#### 9.3.1.2 PK-Analyses

**Bevacizumab-Peripheral Venous Blood-Plasma-Concentration**

| Parameter                    | Value                 | Unit       |
|------------------------------|-----------------------|------------|
| C <sub>max</sub>             | 0.68                  | μmol/l     |
| C <sub>max_norm</sub>        | $2.04 \times 10^7$    | mg/l       |
| t <sub>max</sub>             | 1.00                  | h          |
| C <sub>tEnd</sub>            | 0.23                  | μmol/l     |
| AUC <sub>tEnd</sub>          | 6586.24               | μmol*min/l |
| AUC <sub>tEnd_norm</sub>     | $1.98 \times 10^{14}$ | μg*min/l   |
| AUC <sub>inf</sub>           | 16013.58              | μmol*min/l |
| AUC <sub>inf_norm</sub>      | $4.80 \times 10^{14}$ | μg*min/l   |
| MRT                          | 658.14                | h          |
| Half-Life                    | 472.66                | h          |
| % AUC (t <sub>last</sub> -∞) | 0.59                  |            |
| Total body clearance/F       | $2.08 \times 10^{-3}$ | ml/min/kg  |
| V <sub>ss</sub> (plasma)/F   | 82.20                 | ml/kg      |
| V <sub>d</sub> (plasma)/F    | 85.17                 | ml/kg      |

**Table 9.6:** PK-Analyses for Bevacizumab-Peripheral Venous Blood-Plasma-Concentration

## Chapter 10

# Sim\_patient\_ped\_15mg/kg

### 10.1 Used building blocks

| Building Block | Name                                          |
|----------------|-----------------------------------------------|
| Individual     | Patient_ped (see section 1.4 in Part I)       |
| Compound       | Bevacizumab (see section 2.2 in Part I)       |
| Protocol       | Infusion_15mg/kg (see section 3.10 in Part I) |

**Table 10.1:** Building Block

### 10.2 Simulation Properties

#### 10.2.1 Model Structure

Allow aging

No

#### Calculation methods

| Category                  | Calculation methods   |
|---------------------------|-----------------------|
| Endothelial surface areas | Organ vascularization |
| Body surface area         | Mosteller             |

**Table 10.2:** Calculation methods

#### 10.2.2 Compounds

##### 10.2.2.1 Bevacizumab

#### Compound Configuration

| Parameter                                  | Alternative in compound | Value   | Unit      |
|--------------------------------------------|-------------------------|---------|-----------|
| Solubility                                 | Measurement             | 9999.00 | mg/l      |
| Lipophilicity                              | Measurement             | −5.00   | Log Units |
| Fraction unbound (plasma, reference value) | Measurement             | 1.00    |           |
| <i>continued on next page</i>              |                         |         |           |

| <i>continued from previous page</i> |                         |       |        |
|-------------------------------------|-------------------------|-------|--------|
| Parameter                           | Alternative in compound | Value | Unit   |
| Specific organ permeability         | Calculated              | 0     | cm/min |
| Specific intestinal permeability    | Calculated              | 0     | cm/min |

**Table 10.3:** Compound Configuration**Calculation methods**

| Category                | Calculation methods |
|-------------------------|---------------------|
| Partition coefficients  | PK-Sim Standard     |
| Cellular permeabilities | PK-Sim Standard     |

**Table 10.4:** Calculation methods**10.2.3 Processes****10.2.3.1 Bevacizumab****Specific Binding**

Mapping VEGFA with VEGFA-Paper

**10.2.4 Administration****10.2.4.1 Bevacizumab****Simple protocol**

Intravenous Infusion

Dosing interval: Single

Dose: 15.00 mg/kg

Infusion time: 60.00 min

**10.3 Charts**

### 10.3.1 Time Profile Analysis

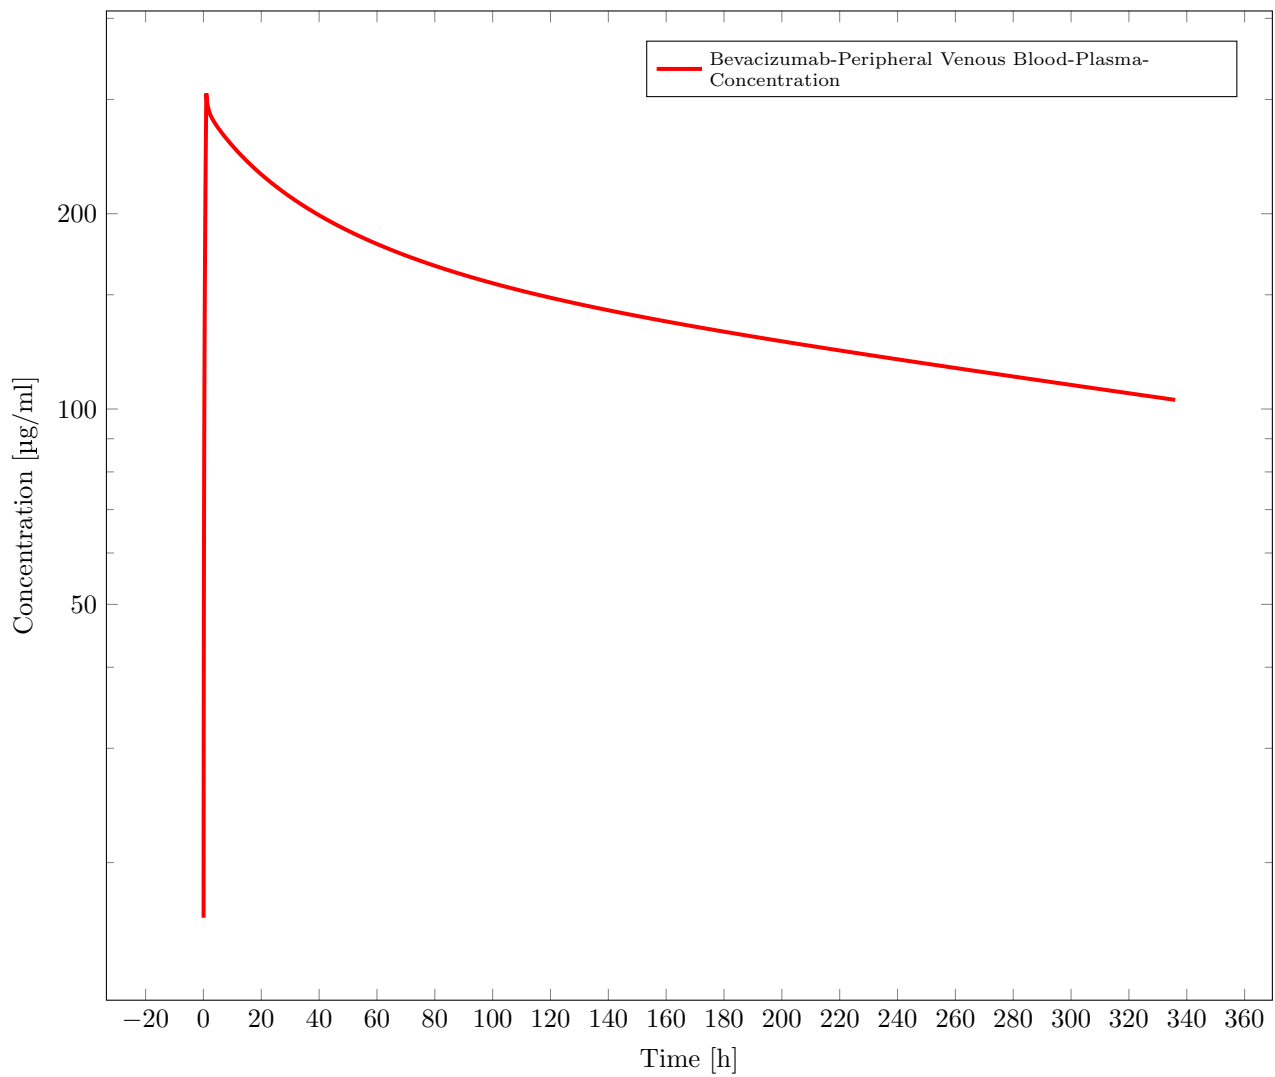

Figure 10.1

#### 10.3.1.1 Global PK-Analyses

| Parameter              | Compound    | Value                 | Unit      |
|------------------------|-------------|-----------------------|-----------|
| Vss (plasma)           | Bevacizumab | 82.32                 | ml/kg     |
| Vd (plasma)            | Bevacizumab | 85.34                 | ml/kg     |
| Vss (phys-chem)        | Bevacizumab | 650.79                | ml/kg     |
| Total plasma clearance | Bevacizumab | $2.09 \times 10^{-3}$ | ml/min/kg |

Table 10.5: Global PK-Analyses

#### 10.3.1.2 PK-Analyses



**Bevacizumab-Peripheral Venous Blood-Plasma-Concentration**

| Parameter                    | Value                 | Unit       |
|------------------------------|-----------------------|------------|
| C <sub>max</sub>             | 2.04                  | μmol/l     |
| C <sub>max_norm</sub>        | $2.04 \times 10^7$    | mg/l       |
| t <sub>max</sub>             | 1.00                  | h          |
| C <sub>tEnd</sub>            | 0.69                  | μmol/l     |
| AUC <sub>tEnd</sub>          | 19721.20              | μmol*min/l |
| AUC <sub>tEnd_norm</sub>     | $1.97 \times 10^{14}$ | μg*min/l   |
| AUC <sub>inf</sub>           | 47833.70              | μmol*min/l |
| AUC <sub>inf_norm</sub>      | $4.78 \times 10^{14}$ | μg*min/l   |
| MRT                          | 656.31                | h          |
| Half-Life                    | 471.61                | h          |
| % AUC (t <sub>last</sub> -∞) | 0.59                  |            |
| Total body clearance/F       | $2.09 \times 10^{-3}$ | ml/min/kg  |
| V <sub>ss</sub> (plasma)/F   | 82.32                 | ml/kg      |
| V <sub>d</sub> (plasma)/F    | 85.34                 | ml/kg      |

**Table 10.6:** PK-Analyses for Bevacizumab-Peripheral Venous Blood-Plasma-Concentration

## Part III

# Observed Data

# Chapter 1

## Beva\_Demarchi2021\_HV\_- 1mpk..Human.iv perfusion.1.Bevacizumab\_human\_sim

Observed Data

Beva\_Demarchi2021\_HV\_1mpk..Human.iv perfusion.1.Bevacizumab\_human\_sim

Source: J:\PhInC\Suivi\_Echanges\Stage\Salih Benamara\_2022\Gastro Plus\Bevacizumab\_all\_Raw\_Data\Donne  
propres\Beva\_Demarchi2021\_HV\_1mpk.csv

Sheet:

Species: Human

Route: iv perfusion

Dose: 1

Molecule: Bevacizumab\_human\_sim

| Time [h] | Measurement [ $\mu\text{g/ml}$ ] |
|----------|----------------------------------|
| 0        | 0.06                             |
| 0.75     | 12.00                            |
| 4.86     | 23.00                            |
| 16.21    | 22.50                            |
| 25.93    | 22.00                            |
| 43.75    | 19.00                            |
| 58.34    | 14.69                            |
| 71.30    | 13.08                            |
| 95.61    | 12.19                            |
| 183.12   | 8.90                             |
| 358.14   | 6.06                             |
| 526.67   | 5.85                             |
| 696.83   | 3.23                             |
| 862.12   | 2.47                             |
| 1030.65  | 1.84                             |
| 1199.19  | 1.41                             |
| 1534.64  | 0.76                             |
| 1704.79  | 0.49                             |
| 1871.71  | 0.27                             |
| 2278.46  | 0.01                             |

**Table 1.1:** Beva\_Demarchi2021\_HV\_1mpk..Hu

## Chapter 2

# Beva\_Hetema2017\_HV\_- 1mpk..Human.iv perfusion.1.Bevacizumab\_human\_sim

Observed Data

Beva\_Hetema2017\_HV\_1mpk..Human.iv perfusion.1.Bevacizumab\_human\_sim

Source: J:\PhInC\Suivi\_Echanges\Stage\Salih Benamara\_2022\Gastro Plus\Bevacizumab\_all\_Raw\_Data\Donne  
propres\Beva\_Hetema2017\_HV\_1mpk.csv

Sheet:

Species: Human

Route: iv perfusion

Dose: 1

Molecule: Bevacizumab\_human\_sim

| Time [h] | Measurement [ $\mu\text{g/ml}$ ] |
|----------|----------------------------------|
| 0.64     | 24.50                            |
| 1.29     | 22.93                            |
| 1.93     | 21.48                            |
| 2.57     | 21.06                            |
| 24.44    | 18.23                            |
| 46.95    | 14.39                            |
| 91.32    | 11.39                            |
| 169.14   | 9.88                             |
| 333.78   | 7.08                             |
| 502.29   | 5.12                             |
| 838.00   | 2.53                             |
| 1179.50  | 1.26                             |

**Table 2.1:** Beva\_Hetema2017\_HV\_1mpk..Huma

## Chapter 3

# Beva\_Hummel2022\_HV\_- 1mpk..Human.iv perfusion.1.Bevacizumab\_human\_sim

Observed Data

Beva\_Hummel2022\_HV\_1mpk..Human.iv perfusion.1.Bevacizumab\_human\_sim

Source: J:\PhInC\Suivi\_Echanges\Stage\Salih Benamara\_2022\Gastro Plus\Bevacizumab\_all\_Raw\_Data\Donne  
propres\Beva\_Hummel2022\_HV\_1mpk.csv

Sheet:

Species: Human

Route: iv perfusion

Dose: 1

Molecule: Bevacizumab\_human\_sim

| Time [h] | Measurement [ $\mu\text{g/ml}$ ] |
|----------|----------------------------------|
| 0.33     | 5.00                             |
| 1.00     | 15.00                            |
| 1.50     | 25.00                            |
| 2.00     | 24.90                            |
| 3.00     | 24.80                            |
| 4.00     | 24.60                            |
| 5.00     | 24.50                            |
| 6.00     | 24.40                            |
| 8.00     | 24.20                            |
| 20.05    | 24.07                            |
| 30.74    | 20.16                            |
| 41.43    | 17.65                            |
| 60.14    | 15.46                            |
| 81.52    | 13.73                            |
| 102.90   | 12.39                            |
| 134.97   | 11.25                            |
| 163.04   | 10.30                            |
| 204.46   | 9.50                             |
| 273.95   | 8.76                             |
| 350.13   | 7.61                             |
| 510.49   | 5.22                             |
| 672.19   | 4.00                             |

*continued on next page*

| <i>continued from previous page</i> |                                                  |
|-------------------------------------|--------------------------------------------------|
| <b>Time [h]</b>                     | <b>Measurement [<math>\mu\text{g/ml}</math>]</b> |
| 1014.30                             | 2.20                                             |
| 1348.39                             | 1.15                                             |
| 1679.81                             | 0.63                                             |
| 2013.90                             | 0.31                                             |
| 2353.34                             | 0.10                                             |

**Table 3.1:** Beva\_Hummel2022\_HV\_1mpk..Huma

## Chapter 4

# Beva\_wu2019\_HV\_1mpk..Human.iv perfusion.1.Bevacizumab\_human\_sim.1

Observed Data

Beva\_wu2019\_HV\_1mpk..Human.iv perfusion.1.Bevacizumab\_human\_sim.1

Source: J:\PhInC\Suivi\_Echanges\Stage\Salih Benamara\_2022\Gastro Plus\Bevacizumab\_all\_Raw\_Data\Donne  
propres\Beva\_wu2019\_HV\_1mpk.csv

Sheet:

Species: Human

Route: iv perfusion

Dose: 1

Molecule: Bevacizumab\_human\_sim

Subject Id: 1

| Time [h] | Measurement [ $\mu\text{g/ml}$ ] |
|----------|----------------------------------|
| 0.75     | 12.00                            |
| 1.50     | 25.00                            |
| 2.50     | 24.50                            |
| 3.50     | 24.00                            |
| 5.50     | 22.50                            |
| 9.50     | 20.00                            |
| 14.58    | 18.09                            |
| 19.92    | 16.04                            |
| 46.98    | 13.86                            |
| 94.96    | 11.28                            |
| 168.77   | 8.42                             |
| 237.64   | 7.40                             |
| 336.02   | 6.29                             |
| 503.26   | 4.86                             |
| 671.74   | 3.69                             |
| 840.22   | 2.62                             |
| 1007.47  | 1.97                             |
| 1344.42  | 1.13                             |
| 1680.16  | 0.60                             |
| 2015.89  | 0.31                             |
| 2351.62  | 0.18                             |

**Table 4.1:** Beva\_wu2019\_HV\_1mpk..Human.iv

## Chapter 5

# Beva\_wu2019\_HV\_1mpk..Human.iv perfusion.1.Bevacizumab\_human\_sim.2

Observed Data

Beva\_wu2019\_HV\_1mpk..Human.iv perfusion.1.Bevacizumab\_human\_sim.2

Source: J:\PhInC\Suivi\_Echanges\Stage\Salih Benamara\_2022\Gastro Plus\Bevacizumab\_all\_Raw\_Data\Donne  
propres\Beva\_wu2019\_HV\_1mpk.csv

Sheet:

Species: Human

Route: iv perfusion

Dose: 1

Molecule: Bevacizumab\_human\_sim

Subject Id: 2

| Time [h] | Measurement [ $\mu\text{g/ml}$ ] |
|----------|----------------------------------|
| 14.58    | 18.09                            |
| 19.92    | 16.04                            |
| 46.98    | 13.86                            |
| 94.96    | 11.28                            |
| 168.77   | 8.42                             |
| 237.64   | 7.40                             |
| 336.02   | 4.99                             |
| 503.26   | 3.92                             |
| 671.74   | 2.98                             |
| 840.22   | 2.04                             |
| 1007.47  | 1.40                             |
| 1344.42  | 0.74                             |
| 1680.16  | 0.30                             |
| 2015.89  | 0.10                             |
| 2351.62  | 0.03                             |

**Table 5.1:** Beva\_wu2019\_HV\_1mpk..Human.iv



## Chapter 6

# Beva\_wu2019\_HV\_1mpk..Human.iv perfusion.1.Bevacizumab\_human\_sim.3

Observed Data

Beva\_wu2019\_HV\_1mpk..Human.iv perfusion.1.Bevacizumab\_human\_sim.3

Source: J:\PhInC\Suivi\_Echanges\Stage\Salih Benamara\_2022\Gastro Plus\Bevacizumab\_all\_Raw\_Data\Donne  
propres\Beva\_wu2019\_HV\_1mpk.csv

Sheet:

Species: Human

Route: iv perfusion

Dose: 1

Molecule: Bevacizumab\_human\_sim

Subject Id: 3

| Time [h] | Measurement [ $\mu\text{g/ml}$ ] |
|----------|----------------------------------|
| 14.58    | 18.09                            |
| 19.92    | 16.04                            |
| 46.98    | 13.86                            |
| 94.96    | 11.28                            |
| 168.77   | 8.42                             |
| 237.64   | 7.40                             |
| 336.02   | 7.66                             |
| 503.26   | 5.92                             |
| 671.74   | 4.35                             |
| 840.22   | 3.14                             |
| 1007.47  | 2.26                             |
| 1344.42  | 1.35                             |
| 1680.16  | 0.65                             |
| 2015.89  | 0.53                             |
| 2351.62  | 0.37                             |

**Table 6.1:** Beva\_wu2019\_HV\_1mpk..Human.iv

## Chapter 7

# Beva\_shin2020\_HV\_3mpk..Human.iv perfusion.3.Bevacizumab\_human\_sim.1

Observed Data

Beva\_shin2020\_HV\_3mpk..Human.iv perfusion.3.Bevacizumab\_human\_sim.1

Source: J:\PhInC\Suivi\_Echanges\Stage\Salih Benamara\_2022\Gastro Plus\Bevacizumab\_all\_Raw\_Data\Donne  
propres\Beva\_shin2020\_HV\_3mpk.csv

Sheet:

Species: Human

Route: iv perfusion

Dose: 3

Molecule: Bevacizumab\_human\_sim

Subject Id: 1

| Time [h] | Measurement [ $\mu\text{g/ml}$ ] |
|----------|----------------------------------|
| 0.75     | 33.20                            |
| 1.50     | 75.45                            |
| 4.15     | 74.26                            |
| 8.30     | 65.68                            |
| 12.45    | 59.41                            |
| 24.90    | 55.56                            |
| 47.73    | 49.14                            |
| 96.49    | 40.42                            |
| 168.09   | 31.80                            |
| 335.14   | 23.01                            |
| 506.33   | 18.61                            |
| 672.35   | 14.89                            |
| 1006.44  | 9.21                             |
| 1344.69  | 5.83                             |
| 1679.83  | 3.69                             |
| 2016.00  | 2.14                             |

**Table 7.1:** Beva\_shin2020\_HV\_3mpk..Human.

## Chapter 8

# Beva\_shin2020\_HV\_3mpk..Human.iv perfusion.3.Bevacizumab\_human\_sim.2

Observed Data

Beva\_shin2020\_HV\_3mpk..Human.iv perfusion.3.Bevacizumab\_human\_sim.2

Source: J:\PhInC\Suivi\_Echanges\Stage\Salih Benamara\_2022\Gastro Plus\Bevacizumab\_all\_Raw\_Data\Donne  
propres\Beva\_shin2020\_HV\_3mpk.csv

Sheet:

Species: Human

Route: iv perfusion

Dose: 3

Molecule: Bevacizumab\_human\_sim

Subject Id: 2

| Time [h] | Measurement [ $\mu\text{g/ml}$ ] |
|----------|----------------------------------|
| 47.73    | 41.10                            |
| 96.49    | 33.25                            |
| 168.09   | 25.72                            |
| 335.14   | 18.61                            |
| 506.33   | 15.06                            |
| 672.35   | 11.14                            |
| 1006.44  | 6.59                             |
| 1344.69  | 3.90                             |
| 1679.83  | 2.11                             |
| 2016.00  | 1.17                             |

**Table 8.1:** Beva\_shin2020\_HV\_3mpk..Human.

## Chapter 9

# Beva\_shin2020\_HV\_3mpk..Human.iv perfusion.3.Bevacizumab\_human\_sim.3

Observed Data

Beva\_shin2020\_HV\_3mpk..Human.iv perfusion.3.Bevacizumab\_human\_sim.3

Source: J:\PhInC\Suivi\_Echanges\Stage\Salih Benamara\_2022\Gastro Plus\Bevacizumab\_all\_Raw\_Data\Donne  
propres\Beva\_shin2020\_HV\_3mpk.csv

Sheet:

Species: Human

Route: iv perfusion

Dose: 3

Molecule: Bevacizumab\_human\_sim

Subject Id: 3

| Time [h] | Measurement [ $\mu\text{g/ml}$ ] |
|----------|----------------------------------|
| 47.73    | 58.75                            |
| 96.49    | 45.96                            |
| 168.09   | 37.59                            |
| 335.14   | 27.20                            |
| 506.33   | 22.50                            |
| 672.35   | 18.61                            |
| 1006.44  | 12.32                            |
| 1344.69  | 7.79                             |
| 1679.83  | 5.33                             |
| 2016.00  | 3.21                             |

**Table 9.1:** Beva\_shin2020\_HV\_3mpk..Human.

## Chapter 10

# Beva\_sinn2021\_HV\_3mpk..Human.iv perfusion.3.Bevacizumab\_human\_sim

Observed Data

Beva\_sinn2021\_HV\_3mpk..Human.iv perfusion.3.Bevacizumab\_human\_sim

Source: J:\PhInC\Suivi\_Echanges\Stage\Salih Benamara\_2022\Gastro Plus\Bevacizumab\_all\_Raw\_Data\Donne  
propres\Beva\_sinn2021\_HV\_3mpk.csv

Sheet:

Species: Human

Route: iv perfusion

Dose: 3

Molecule: Bevacizumab\_human\_sim

| Time [h] | Measurement [ $\mu\text{g/ml}$ ] |
|----------|----------------------------------|
| 0.94     | 83.47                            |
| 2.00     | 83.00                            |
| 3.00     | 82.50                            |
| 4.00     | 82.00                            |
| 5.00     | 81.00                            |
| 6.00     | 80.50                            |
| 8.00     | 76.00                            |
| 19.75    | 73.15                            |
| 36.67    | 64.10                            |
| 52.65    | 57.75                            |
| 78.04    | 51.32                            |
| 106.25   | 49.56                            |
| 132.57   | 46.24                            |
| 159.84   | 43.43                            |
| 184.29   | 41.08                            |
| 222.84   | 38.06                            |
| 301.82   | 33.59                            |
| 473.88   | 24.06                            |
| 639.37   | 17.84                            |
| 984.44   | 10.60                            |
| 1307.88  | 6.38                             |
| 1840.06  | 2.70                             |
| 2370.36  | 1.03                             |

*continued on next page*

| continued from previous page |                                  |
|------------------------------|----------------------------------|
| Time [h]                     | Measurement [ $\mu\text{g/ml}$ ] |

**Table 10.1:** Beva\_sinn2021\_HV\_3mpk..Human.

## Chapter 11

# Beva\_li2017\_HV\_0.5mpk..Human.iv perfusion.0.5.Bevacizumab\_human\_ sim.1

Observed Data

Beva\_li2017\_HV\_0.5mpk..Human.iv perfusion.0.5.Bevacizumab\_human\_sim.1

Source: J:\PhInC\Suivi\_Echanges\Stage\Salih Benamara\_2022\Gastro Plus\Bevacizumab\_all\_Raw\_Data\Donne  
propres\Beva\_li2017\_HV\_0.5mpk.csv

Sheet:

Species: Human

Route: iv perfusion

Dose: 0.5

Molecule: Bevacizumab\_human\_sim

Subject Id: 1

| Time [h] | Measurement [mg/l] |
|----------|--------------------|
| 2.00     | 6.74               |
| 6.00     | 6.50               |
| 16.73    | 6.30               |
| 24.00    | 6.00               |
| 39.03    | 4.70               |
| 64.13    | 4.55               |
| 114.31   | 3.64               |
| 161.71   | 3.40               |
| 329.00   | 2.45               |
| 663.57   | 1.32               |
| 833.64   | 0.86               |
| 1000.93  | 0.50               |
| 1168.22  | 0.25               |
| 1335.50  | 0.15               |

**Table 11.1:** Beva\_li2017\_HV\_0.5mpk..Human.

## Chapter 12

# Beva\_li2017\_HV\_0.5mpk..Human.iv perfusion.0.5.Bevacizumab\_human\_ sim.2

Observed Data

Beva\_li2017\_HV\_0.5mpk..Human.iv perfusion.0.5.Bevacizumab\_human\_sim.2

Source: J:\PhInC\Suivi\_Echanges\Stage\Salih Benamara\_2022\Gastro Plus\Bevacizumab\_all\_Raw\_Data\Donne  
propres\Beva\_li2017\_HV\_0.5mpk.csv

Sheet:

Species: Human

Route: iv perfusion

Dose: 0.5

Molecule: Bevacizumab\_human\_sim

Subject Id: 2

| Time [h] | Measurement [mg/l] |
|----------|--------------------|
| 2.00     | 5.58               |
| 8.38     | 4.62               |
| 12.00    | 4.70               |
| 24.00    | 4.50               |
| 39.11    | 3.58               |
| 64.25    | 3.28               |
| 111.73   | 3.01               |
| 162.01   | 2.10               |
| 326.82   | 1.37               |
| 662.01   | 0.64               |
| 829.61   | 0.45               |
| 1000.00  | 0.23               |
| 1170.39  | 0.10               |
| 1337.99  | 0.08               |

**Table 12.1:** Beva\_li2017\_HV\_0.5mpk..Human.



## Chapter 13

# Beva\_li2017\_HV\_0.5mpk..Human.iv perfusion.0.5.Bevacizumab\_human\_sim.3

Observed Data

Beva\_li2017\_HV\_0.5mpk..Human.iv perfusion.0.5.Bevacizumab\_human\_sim.3

Source: J:\PhInC\Suivi\_Echanges\Stage\Salih Benamara\_2022\Gastro Plus\Bevacizumab\_all\_Raw\_Data\Donne  
propres\Beva\_li2017\_HV\_0.5mpk.csv

Sheet:

Species: Human

Route: iv perfusion

Dose: 0.5

Molecule: Bevacizumab\_human\_sim

Subject Id: 3

| Time [h] | Measurement [mg/l] |
|----------|--------------------|
| 2.00     | 8.14               |
| 5.50     | 7.52               |
| 19.27    | 6.40               |
| 24.00    | 6.30               |
| 41.28    | 6.19               |
| 66.06    | 5.21               |
| 112.84   | 4.92               |
| 162.39   | 4.01               |
| 330.28   | 3.26               |
| 663.30   | 1.35               |
| 833.94   | 0.90               |
| 999.08   | 0.51               |
| 1166.97  | 0.21               |
| 1337.61  | 0.11               |

**Table 13.1:** Beva\_li2017\_HV\_0.5mpk..Human.

## Chapter 14

# Beva\_li2017\_HV\_0.5mpk..Human.iv perfusion.0.5.Bevacizumab\_human\_ sim.4

Observed Data

Beva\_li2017\_HV\_0.5mpk..Human.iv perfusion.0.5.Bevacizumab\_human\_sim.4

Source: J:\PhInC\Suivi\_Echanges\Stage\Salih Benamara\_2022\Gastro Plus\Bevacizumab\_all\_Raw\_Data\Donne  
propres\Beva\_li2017\_HV\_0.5mpk.csv

Sheet:

Species: Human

Route: iv perfusion

Dose: 0.5

Molecule: Bevacizumab\_human\_sim

Subject Id: 4

| Time [h] | Measurement [mg/l] |
|----------|--------------------|
| 2.00     | 7.52               |
| 5.51     | 6.26               |
| 13.79    | 6.05               |
| 24.00    | 6.00               |
| 41.36    | 4.76               |
| 66.18    | 4.55               |
| 113.05   | 4.01               |
| 162.68   | 3.42               |
| 330.88   | 2.51               |
| 664.52   | 1.18               |
| 835.48   | 0.88               |
| 1000.92  | 0.71               |
| 1169.12  | 0.36               |
| 1337.32  | 0.18               |

**Table 14.1:** Beva\_li2017\_HV\_0.5mpk..Human.

## Chapter 15

# Beva\_li2017\_HV\_0.5mpk..Human.iv perfusion.0.5.Bevacizumab\_human\_ sim.5

Observed Data

Beva\_li2017\_HV\_0.5mpk..Human.iv perfusion.0.5.Bevacizumab\_human\_sim.5

Source: J:\PhInC\Suivi\_Echanges\Stage\Salih Benamara\_2022\Gastro Plus\Bevacizumab\_all\_Raw\_Data\Donne  
propres\Beva\_li2017\_HV\_0.5mpk.csv

Sheet:

Species: Human

Route: iv perfusion

Dose: 0.5

Molecule: Bevacizumab\_human\_sim

Subject Id: 5

| Time [h] | Measurement [mg/l] |
|----------|--------------------|
| 2.00     | 6.85               |
| 2.75     | 5.70               |
| 19.27    | 5.32               |
| 24.00    | 5.20               |
| 41.28    | 4.74               |
| 66.06    | 3.95               |
| 115.60   | 3.40               |
| 165.14   | 3.03               |
| 330.28   | 1.89               |
| 663.30   | 0.98               |
| 833.94   | 0.71               |
| 1001.83  | 0.59               |
| 1169.72  | 0.36               |
| 1334.86  | 0.16               |

**Table 15.1:** Beva\_li2017\_HV\_0.5mpk..Human.

## Chapter 16

# Beva\_Gordon2001\_patients\_- 3mpk..Human.iv perfusion.3.Bevacizumab

Observed Data

Beva\_Gordon2001\_patients\_3mpk..Human.iv perfusion.3.Bevacizumab

Source: J:\PhInC\Suivi\_Echanges\Stage\Salih Benamara\_2022\Gastro Plus\Bevacizumab\_all\_Raw\_Data\Donne  
propres\Beva\_Gordon2001\_patients\_3mpk.csv

Sheet:

Species: Human

Route: iv perfusion

Dose: 3

Molecule: Bevacizumab

| Time [h] | Measurement [ $\mu\text{g/ml}$ ] |
|----------|----------------------------------|
| 2.83     | 77.29                            |
| 17.00    | 63.47                            |
| 45.33    | 58.82                            |
| 90.66    | 44.09                            |
| 161.48   | 32.55                            |
| 235.14   | 29.70                            |
| 334.30   | 26.29                            |
| 504.28   | 17.70                            |
| 671.43   | 13.66                            |
| 674.27   | 92.14                            |
| 835.75   | 44.47                            |
| 841.42   | 134.36                           |
| 1005.73  | 57.44                            |
| 1008.57  | 170.96                           |
| 1056.73  | 110.13                           |
| 1172.88  | 70.90                            |
| 1345.70  | 44.94                            |
| 1507.18  | 28.49                            |
| 1728.16  | 21.64                            |

**Table 16.1:** Beva\_Gordon2001\_patients\_3mpk

## Chapter 17

# Beva\_Gordon2001\_patients\_- 0.3mpk..Human.iv perfusion.0.3.Bevacizumab

Observed Data

Beva\_Gordon2001\_patients\_0.3mpk..Human.iv perfusion.0.3.Bevacizumab

Source: J:\PhInC\Suivi\_Echanges\Stage\Salih Benamara\_2022\Gastro Plus\Bevacizumab\_all\_Raw\_Data\Donne  
propres\Beva\_Gordon2001\_patients\_0.3mpk.csv

Sheet:

Species: Human

Route: iv perfusion

Dose: 0.3

Molecule: Bevacizumab

| Time [h] | Measurement [ $\mu\text{g/ml}$ ] |
|----------|----------------------------------|
| 5.67     | 6.07                             |
| 19.83    | 5.21                             |
| 45.33    | 4.28                             |
| 90.66    | 3.02                             |
| 161.48   | 2.33                             |
| 235.14   | 1.75                             |
| 331.47   | 1.31                             |
| 501.45   | 0.72                             |
| 671.00   | 0.73                             |
| 672.00   | 7.57                             |
| 835.75   | 2.91                             |
| 841.42   | 9.92                             |
| 1005.73  | 3.99                             |
| 1008.57  | 10.06                            |
| 1056.73  | 8.91                             |
| 1172.88  | 5.00                             |
| 1342.87  | 2.94                             |
| 1510.02  | 1.75                             |
| 1728.16  | 0.47                             |

**Table 17.1:** Beva\_Gordon2001\_patients\_0.3m

## Chapter 18

# Beva\_Gordon2001\_patients\_- 1mpk..Human.iv perfusion.1.Bevacizumab

Observed Data

Beva\_Gordon2001\_patients\_1mpk..Human.iv perfusion.1.Bevacizumab

Source: J:\PhInC\Suivi\_Echanges\Stage\Salih Benamara\_2022\Gastro Plus\Bevacizumab\_all\_Raw\_Data\Donne  
propres\Beva\_Gordon2001\_patients\_1mpk.csv

Sheet:

Species: Human

Route: iv perfusion

Dose: 1

Molecule: Bevacizumab

| Time [h] | Measurement [ $\mu\text{g/ml}$ ] |
|----------|----------------------------------|
| 2.83     | 24.82                            |
| 19.80    | 21.65                            |
| 45.25    | 17.25                            |
| 90.51    | 13.13                            |
| 161.21   | 10.15                            |
| 234.75   | 7.85                             |
| 330.91   | 6.16                             |
| 500.61   | 4.28                             |
| 667.47   | 2.64                             |
| 670.30   | 27.59                            |
| 837.17   | 11.81                            |
| 840.00   | 39.69                            |
| 1004.04  | 18.33                            |
| 1006.87  | 45.49                            |
| 1054.95  | 31.62                            |
| 1170.91  | 26.77                            |
| 1340.61  | 16.74                            |
| 1507.47  | 12.18                            |
| 1725.25  | 8.99                             |

**Table 18.1:** Beva\_Gordon2001\_patients\_1mpk

## Chapter 19

# Beva\_Gordon2001\_patients\_- 10mpk..Human.iv perfusion.10.Bevacizumab

Observed Data

Beva\_Gordon2001\_patients\_10mpk..Human.iv perfusion.10.Bevacizumab

Source: J:\PhInC\Suivi\_Echanges\Stage\Salih Benamara\_2022\Gastro Plus\Bevacizumab\_all\_Raw\_Data\Donne  
propres\Beva\_Gordon2001\_patients\_10mpk.csv

Sheet:

Species: Human

Route: iv perfusion

Dose: 10

Molecule: Bevacizumab

| Time [h] | Measurement [ $\mu\text{g/ml}$ ] |
|----------|----------------------------------|
| 2.83     | 233.57                           |
| 22.63    | 183.30                           |
| 48.08    | 177.83                           |
| 90.51    | 135.39                           |
| 164.04   | 109.52                           |
| 237.58   | 95.56                            |
| 333.74   | 76.13                            |
| 500.61   | 52.13                            |
| 667.47   | 36.80                            |
| 673.13   | 284.41                           |
| 834.34   | 114.61                           |
| 840.00   | 379.27                           |
| 1004.04  | 188.94                           |
| 1006.87  | 428.13                           |
| 1054.95  | 396.90                           |
| 1173.74  | 226.60                           |
| 1343.43  | 175.15                           |
| 1507.47  | 119.94                           |
| 1725.25  | 91.31                            |

**Table 19.1:** Beva\_Gordon2001\_patients\_10mp

## Chapter 20

# Beva\_Romera2018\_patients\_- 5mpk..Human.iv perfusion.5.Bevacizumab

Observed Data

Beva\_Romera2018\_patients\_5mpk..Human.iv perfusion.5.Bevacizumab

Source: J:\PhInC\Suivi\_Echanges\Stage\Salih Benamara\_2022\Gastro Plus\Bevacizumab\_all\_Raw\_Data\Donne  
propres\Beva\_Romera2018\_patients\_5mpk.csv

Sheet:

Species: Human

Route: iv perfusion

Dose: 5

Molecule: Bevacizumab

| Time [h] | Measurement [ $\mu\text{g/ml}$ ] |
|----------|----------------------------------|
| 0.82     | 97.77                            |
| 1.64     | 108.28                           |
| 6.36     | 114.33                           |
| 24.82    | 87.26                            |
| 49.03    | 71.18                            |
| 73.23    | 64.81                            |
| 121.23   | 50.00                            |
| 169.03   | 43.47                            |
| 241.64   | 35.35                            |
| 338.46   | 30.41                            |
| 2016.62  | 173.72                           |
| 2017.44  | 181.63                           |
| 2022.79  | 190.56                           |
| 2040.47  | 160.97                           |
| 2064.94  | 146.43                           |
| 2089.20  | 134.18                           |
| 2138.35  | 118.37                           |
| 2186.47  | 106.12                           |
| 2257.20  | 93.37                            |
| 2354.47  | 78.06                            |

**Table 20.1:** Beva\_Romera2018\_patients\_5mpk
